# Supplementary material for: In silico comparative genomic analysis unravels a new candidate protein arsenal specifically associated with Fusarium oxysporum f. sp. albedinis pathogenesis
Source: PubMed Central journal article supplement (PMC9646873; doi:10.1038/s41598-022-21858-1), 2022-11-09
Supplement: 41598_2022_21858_MOESM1_ESM.pdf [file 41598_2022_21858_MOESM1_ESM.pdf]

**Supplementary data 1-Table 1 : strains of the formae speciales belonging to *Fusarium oxysporum* species complex used in this study**

| <b>Strains</b>                                            | <b>Accession Number</b> | <b>Host</b>                | <b>Isolation_Source</b> | <b>Country</b> |
|-----------------------------------------------------------|-------------------------|----------------------------|-------------------------|----------------|
| <i>Fusarium oxysporum</i> . f.sp.albedinis 133            | JAAVJG000000000.1       | date palm                  | wilt plant tissue       | Morocco        |
| <i>Fusarium oxysporum</i> . f.sp.albedinis 9              | JAKELM000000000.1       | date palm                  | diseased palm tree      | Morocco        |
| <i>Fusarium oxysporum</i> . f.sp.apii 207                 | JAAOOO000000000.1       | <i>Apium graveolens</i>    | agricultural field      | USA            |
| <i>Fusarium oxysporum</i> . f.sp.apii NRRL38295           | JAAOOP000000000.1       | <i>Apium graveolens</i>    | agricultural field      | USA            |
| <i>Fusarium oxysporum</i> . f.sp.cepae FoC125             | MRCV000000000.1         | <i>Allium cepa</i>         | Organic material        | United Kingdom |
| <i>Fusarium oxysporum</i> . f.sp.cepae FoCFus2            | MRCU000000000.1         | <i>Allium cepa</i>         | Organic material        | United Kingdom |
| <i>Fusarium oxysporum</i> . f.sp.ciceris 38-1             | MEHF000000000.1         | Chickpea                   |                         | India          |
| <i>Fusarium oxysporum</i> . f.sp.Conglutinans 58385       | NRHZ000000000.1         | <i>Brassica oleracea</i>   | root                    | USA            |
| <i>Fusarium oxysporum</i> . f.sp.conglutinans FGL03-6     | NRIA000000000.2         | <i>Brassica oleracea</i>   | root                    | China          |
| <i>Fusarium oxysporum</i> . f.sp.conglutinans race 254008 | AGNF000000000.1         |                            |                         |                |
| <i>Fusarium oxysporum</i> . f.sp.Coriandrii 3-2           | JAAOON000000000.1       | <i>Coriandrum sativum</i>  | agricultural field      | USA            |
| <i>Fusarium oxysporum</i> . f.sp.Coriandrii G306          | JAAOOM000000000.1       | <i>Coriandrum sativum</i>  | agricultural field      | USA            |
| <i>Fusarium oxysporum</i> . f.sp.cubense 160527           | SRMI000000000.1         | banana                     | infected banana         | Japan          |
| <i>Fusarium oxysporum</i> . f.sp.cubense C1HIR9889        | MBFV000000000.1         | <i>Musa acuminata</i>      | roots                   | Malaysia       |
| <i>Fusarium oxysporum</i> . f.sp.cucumerinum Foc018       | MABM000000000.1         |                            |                         | Greece         |
| <i>Fusarium oxysporum</i> . f.sp.cucumerinum Foc030       | MABN000000000.1         |                            |                         | Israel         |
| <i>Fusarium oxysporum</i> . f.sp.fragariae 160609         | WINB000000000.1         | <i>Fragaria x ananassa</i> | plant matter            | South Korea    |
| <i>Fusarium oxysporum</i> . f.sp.fragariae BRIP5168a      | WIMZ000000000.1         | <i>Fragaria x ananassa</i> | plant matter            | Australia      |
| <i>Fusarium oxysporum</i> . f.sp.gladioli G2              | NJCL000000000.1         | <i>Gladiolus</i>           | <i>Gladiolus</i> sp     | France         |
| <i>Fusarium oxysporum</i> . f.sp.gladioli G76             | NJCK000000000.1         | <i>Gladiolus</i>           | <i>Gladiolus</i> sp     | Italy          |
| <i>Fusarium oxysporum</i> . f.sp.koaei 44                 | CP052908.1-CP052907.1   | <i>Acacia koa</i>          | Plant                   | USA            |
| <i>Fusarium oxysporum</i> . f.sp.lagenariae 01-03008      | NJCJ000000000.1         | <i>Lagenaria</i>           | <i>Lagenaria</i> sp     | Japan          |
| <i>Fusarium oxysporum</i> . f.sp.lagenariae Lag3-1        | NJCH000000000.1         | <i>Lagenaria</i>           | <i>Lagenaria</i> sp     | Japan          |

|                                                         |                   |                     |                                                 |                |
|---------------------------------------------------------|-------------------|---------------------|-------------------------------------------------|----------------|
| Fusarium oxysporum. f.sp.lilii Fol39                    | NJCF00000000.1    | Lilium              | Lilium sp                                       | Netherlands    |
| Fusarium oxysporum. f.sp.lini F282                      | JABJUB000000000.1 | Linum usitatissimum | flax root                                       | Russia         |
| Fusarium oxysporum. f.sp.lini F324                      | JABJUD000000000.1 | Linum usitatissimum | flax root                                       | Russia         |
| Fusarium oxysporum. f.sp.lycopersici Fol014             | MALJ00000000.1    |                     |                                                 | USA            |
| Fusarium oxysporum. f.sp.lycopersici Fol074             | MALS00000000.1    |                     |                                                 | USA            |
| Fusarium oxysporum. f.sp.matthiolae PHW726              | WJXY00000000.1    | Matthiola incana    |                                                 | USA            |
| Fusarium oxysporum. f.sp.medicaginis Fom-5190a          | LSNI00000000.1    | Medicago sativa     | wilting leaves in a field of<br>Medicago sativa | Australia      |
| Fusarium oxysporum. f.sp.melongenae J-71                | NJCC00000000.1    |                     | Solanum melongena                               |                |
| Fusarium oxysporum. f.sp.melonis 26406                  | AGNE00000000.1    |                     |                                                 |                |
| Fusarium oxysporum. f.sp.melonis Fom005                 | MALY00000000.2    |                     |                                                 | Spain          |
| Fusarium oxysporum. f.sp.momordicae 90NF2-1             | NJCA00000000.1    | Momordica           | Momordica sp                                    | Japan          |
| Fusarium oxysporum. f.sp.momordicae NRRL26413           | NJCB00000000.1    | Momordica           | Momordica sp                                    | Taiwan         |
| Fusarium oxysporum. f.sp.narcissi N139                  | MQTW00000000.1    | Narcissus           | plant bulb                                      | United Kingdom |
| Fusarium oxysporum. f.sp.narcissi Na5                   | NJCV00000000.1    | Narcissus           | Narcissus sp                                    | Netherlands    |
| Fusarium oxysporum. f.sp.nicotianae Ft-1512             | NJCU00000000.1    | Nicotiana           | Nicotiana sp                                    | USA            |
| Fusarium oxysporum. f.sp.nicotianae Ft-Rob              | NJBX00000000.1    | Nicotiana           | Nicotiana sp                                    | USA            |
| Fusarium oxysporum. f.sp.niveum Fon002                  | MALA00000000.1    |                     |                                                 | Israel         |
| Fusarium oxysporum. f.sp.niveum R1                      | JACRUY000000000.1 | Citrullus lanatus   | Watermelon plant                                | USA            |
| Fusarium oxysporum. f.sp.pisi HDV247                    | AGBI00000000.1    |                     |                                                 |                |
| Fusarium oxysporum. f.sp.radicis-cucumerinum<br>Forc024 | MABR00000000.1    |                     |                                                 | Greece         |
| Fusarium oxysporum. f.sp.radicis-cucumerinum<br>Forc031 | MABS00000000.1    |                     |                                                 | Greece         |
| Fusarium oxysporum. f.sp.radicis-lycopersici 26381      | AGNB00000000.1    |                     |                                                 |                |
| Fusarium oxysporum. f.sp.raphani 54005                  | AGNG00000000.1    |                     |                                                 |                |
| Fusarium oxysporum. f.sp.spinaciae Fus254               | JAALGI000000000.1 | Spinacia oleracea   | spinach                                         | USA            |

|                                                 |                   |                   |                     |             |
|-------------------------------------------------|-------------------|-------------------|---------------------|-------------|
| Fusarium oxysporum. f.sp.spinaciae MF15         | JABCQZ000000000.1 | Spinacia oleracea |                     | USA         |
| Fusarium oxysporum. f.sp.tulipaeTu67            | NJBS000000000.1   | tulip bulb        | infected tulip bulb | Netherlands |
| Fusarium oxysporum. f.sp.Vasinflectum LA1E      | VINN000000000.1   |                   | Mycellium           | USA         |
| Fusarium oxysporum. f.sp.Vasinflectum NRRL31665 | JAANYM000000000.1 | cotton            | cotton roots        |             |
