# Supplementary material for: In silico comparative genomic analysis unravels a new candidate protein arsenal specifically associated with Fusarium oxysporum f. sp. albedinis pathogenesis
Source: PubMed Central journal article supplement (PMC9646873; doi:10.1038/s41598-022-21858-1), 2022-11-09
Supplement: 41598_2022_21858_MOESM2_ESM.pdf [file 41598_2022_21858_MOESM2_ESM.pdf]

**Supplementary data 2-Table 1 : predicted gene content of the analyzed formae speciales belonging to Fusarium oxysporum species complex.**

| Stains                          | Pan-genome                  |                           | Core-genome                 |                           | Accessory genome            |                           | Unique-genome               |                           |
|---------------------------------|-----------------------------|---------------------------|-----------------------------|---------------------------|-----------------------------|---------------------------|-----------------------------|---------------------------|
|                                 | Genes with Unknown function | Genes with Known function | Genes with Unknown function | Genes with Known function | Genes with Unknown function | Genes with Known function | Genes with Unknown function | Genes with Known function |
| F.o.f.sp.apiiNRRL38295          | 5977                        | 13308                     | 939                         | 4269                      | 4754                        | 8585                      | 284                         | 454                       |
| F.o.f.sp.corianarii3-2          | 6057                        | 13366                     | 940                         | 4262                      | 5036                        | 9030                      | 81                          | 74                        |
| F.o.f.sp.corianariiGL306        | 5974                        | 13413                     | 941                         | 4273                      | 4943                        | 9014                      | 90                          | 126                       |
| F.o.f.sp.vasinfestumLA1E        | 4818                        | 11655                     | 957                         | 4272                      | 3405                        | 6457                      | 706                         | 676                       |
| F.o.f.sp.spinaciaeFus254        | 5107                        | 12348                     | 956                         | 4272                      | 3672                        | 7183                      | 479                         | 893                       |
| F.o.f.sp.momordicae90NF2-1      | 4721                        | 11132                     | 945                         | 4258                      | 3670                        | 6783                      | 104                         | 91                        |
| F.o.f.sp.momordicaeNRRL26413    | 4807                        | 11181                     | 945                         | 4260                      | 3765                        | 6839                      | 97                          | 82                        |
| F.o.f.sp.lagenariae01-03008     | 5105                        | 11509                     | 939                         | 4266                      | 3764                        | 6851                      | 397                         | 392                       |
| F.o.f.sp.fragariae160609        | 5122                        | 11526                     | 943                         | 4259                      | 3840                        | 6972                      | 339                         | 295                       |
| F.o.f.sp.niveumR1               | 6126                        | 13884                     | 945                         | 4257                      | 4151                        | 6885                      | 1017                        | 2742                      |
| F.o.f.sp.spinaciaeMF15          | 5379                        | 11706                     | 935                         | 4249                      | 3818                        | 6852                      | 623                         | 605                       |
| F.o.f.sp.nicotianaeFt-1512      | 4665                        | 11226                     | 950                         | 4249                      | 3386                        | 6644                      | 327                         | 333                       |
| F.o.f.sp.vasinfestumNRRL31665   | 5112                        | 11760                     | 979                         | 4370                      | 3574                        | 6714                      | 559                         | 676                       |
| F.o.f.sp.liliiFol39             | 5054                        | 11530                     | 936                         | 4254                      | 3540                        | 6720                      | 576                         | 556                       |
| F.o.f.sp.fragariaeBRIP5168a     | 4255                        | 10721                     | 945                         | 4246                      | 3058                        | 6233                      | 252                         | 242                       |
| F.o.f.sp.LagenariaeLag3-1       | 4387                        | 10819                     | 927                         | 4235                      | 2953                        | 6101                      | 503                         | 483                       |
| F.o.f.sp.koae44                 | 3786                        | 10045                     | 939                         | 4233                      | 2360                        | 5322                      | 487                         | 490                       |
| F.o.f.sp.conglutinans58385      | 5845                        | 11789                     | 951                         | 4278                      | 4601                        | 7356                      | 292                         | 155                       |
| F.o.f.sp.conglutinansFGL03-6    | 5629                        | 13077                     | 944                         | 4266                      | 4329                        | 8002                      | 355                         | 809                       |
| F.o.f.sp.conglutinansrace254008 | 5327                        | 11488                     | 951                         | 4276                      | 4240                        | 7126                      | 135                         | 86                        |
| F.o.f.sp.melonisFom005          | 5201                        | 11713                     | 942                         | 4261                      | 3663                        | 6799                      | 595                         | 653                       |
| F.o.f.sp.niveumFon002           | 5017                        | 11251                     | 953                         | 4268                      | 3444                        | 6450                      | 616                         | 533                       |

|                                     |      |       |     |      |      |      |      |      |
|-------------------------------------|------|-------|-----|------|------|------|------|------|
| F.o.f.sp.cucumerinumFoc018          | 5671 | 11964 | 948 | 4285 | 4341 | 7362 | 369  | 317  |
| F.o.f.sp.cucumerinumFoc030          | 5575 | 11918 | 950 | 4288 | 4317 | 7362 | 304  | 268  |
| F.o.f.sp.Raphani54005               | 5344 | 11401 | 957 | 4279 | 3771 | 6456 | 614  | 666  |
| F.o.f.sp.MelongenaeJ-71             | 4948 | 11390 | 954 | 4256 | 3346 | 6395 | 645  | 739  |
| F.o.f.sp.pisiHDV247                 | 5206 | 12075 | 951 | 4263 | 3763 | 7168 | 490  | 644  |
| F.o.f.sp.liniF282                   | 4533 | 11063 | 994 | 4537 | 3271 | 6142 | 254  | 384  |
| F.o.f.sp.liniF324                   | 4567 | 10812 | 980 | 4360 | 3256 | 6020 | 305  | 432  |
| F.o.f.sp.cubense160527              | 4584 | 11277 | 934 | 4208 | 2663 | 5950 | 986  | 1119 |
| F.o.f.sp.ciceris38-1                | 5113 | 11256 | 960 | 4248 | 2510 | 5251 | 1642 | 1757 |
| F.o.f.sp.gladioliG76                | 5457 | 11703 | 949 | 4231 | 3143 | 5971 | 1362 | 1501 |
| F.o.f.sp.lycopersiciFol014          | 4839 | 11103 | 923 | 4222 | 3719 | 6722 | 195  | 159  |
| F.o.f.sp.lycopersiciFol074          | 5065 | 11298 | 925 | 4219 | 3862 | 6889 | 276  | 190  |
| F.o.f.sp.Melonis26406               | 4047 | 12712 | 925 | 4222 | 3808 | 7238 | 821  | 1252 |
| F.o.f.sp.albedinis133               | 5522 | 11938 | 931 | 4247 | 4380 | 7504 | 209  | 187  |
| F.o.f.sp.albedinis9                 | 5835 | 13679 | 926 | 4232 | 4489 | 8384 | 420  | 1063 |
| F.o.f.sp.matthiolaePHW726           | 5299 | 12175 | 917 | 4233 | 3928 | 7219 | 454  | 723  |
| F.o.f.sp.tulipaeTu67                | 5096 | 11618 | 916 | 4228 | 3679 | 6804 | 499  | 586  |
| F.o.f.sp.apii207                    | 5919 | 13443 | 901 | 4247 | 3863 | 7523 | 1139 | 1689 |
| F.o.f.sp.radicis-cucumerinumForc024 | 4468 | 11037 | 914 | 4223 | 3493 | 6713 | 59   | 101  |
| F.o.f.sp.radicis-cucumerinumForc031 | 4484 | 11021 | 912 | 4225 | 3492 | 6707 | 78   | 89   |
| F.o.f.sp.gladioliG2                 | 4991 | 11571 | 911 | 4226 | 3642 | 6848 | 435  | 497  |
| F.o.f.sp.cepaeFoC125                | 4872 | 11458 | 919 | 4240 | 3850 | 7091 | 103  | 127  |
| F.o.f.sp.cepaeFoCFus2               | 4579 | 11994 | 911 | 4233 | 3552 | 7354 | 116  | 407  |
| F.o.f.sp.medicaginisFom-5190a       | 4699 | 11184 | 930 | 4237 | 3290 | 6458 | 478  | 489  |
| F.o.f.sp.Radice-lycopersici26381    | 4538 | 11040 | 914 | 4208 | 3102 | 6211 | 522  | 621  |
| F.o.f.sp.nicotianaeFt-Rob           | 4507 | 11132 | 914 | 4226 | 3247 | 6450 | 346  | 456  |
| F.o.f.sp.narcissiN139               | 5992 | 12354 | 916 | 4230 | 4562 | 7654 | 511  | 470  |
| F.o.f.sp.narcissiNa5                | 5481 | 11896 | 913 | 4233 | 4158 | 7300 | 400  | 363  |
| F.o.f.sp.cubenseC1HIR9889           | 4524 | 10630 | 997 | 4330 | 2063 | 4711 | 1462 | 1589 |

| <b>Supplementary data 2-Table 2 : predicted core-gene families of <i>Fusarium oxysporum</i>. f. sp <i>albedinis</i> strains.</b> |                                                               |                                                             |
|----------------------------------------------------------------------------------------------------------------------------------|---------------------------------------------------------------|-------------------------------------------------------------|
| <b>Gene families</b>                                                                                                             | <b><i>Fusarium oxysporum</i>. f. sp. <i>albedinis</i> 133</b> | <b><i>Fusarium oxysporum</i>. f. sp. <i>albedinis</i> 9</b> |
|                                                                                                                                  | <b>Gene count</b>                                             | <b>Gene count</b>                                           |
| Transketolase,thiaminediphosphatebindingdomain                                                                                   | 3                                                             | 3                                                           |
| PeptidasefamilyM28                                                                                                               | 15                                                            | 15                                                          |
| Vacuolarmembrane-associatedproteinIml1                                                                                           | 1                                                             | 1                                                           |
| Ubiquitincarboxyl-terminalhydrolase                                                                                              | 21                                                            | 21                                                          |
| NAT,N-acetyltransferase,ofN-acetylglutamatesynthase                                                                              | 1                                                             | 1                                                           |
| Fasciclindomain                                                                                                                  | 5                                                             | 3                                                           |
| ABCtransporter                                                                                                                   | 44                                                            | 44                                                          |
| Ferricreductaseliketranstranmembranecomponent                                                                                    | 7                                                             | 7                                                           |
| Nse4C-terminal                                                                                                                   | 1                                                             | 1                                                           |
| Acyl-CoAdehydrogenase,C-terminaldomain                                                                                           | 11                                                            | 11                                                          |
| Calcium-dependentchannel,7TMregion,putativephosphate                                                                             | 5                                                             | 5                                                           |
| DEAD/DEAHboxhelicase                                                                                                             | 36                                                            | 37                                                          |
| D-isomerspecific2-hydroxyaciddehydrogenase,NADbindingdomain                                                                      | 17                                                            | 19                                                          |
| MajorFacilitatorSuperfamily                                                                                                      | 207                                                           | 200                                                         |
| AMP-bindingenzyme                                                                                                                | 39                                                            | 39                                                          |
| non-haemdioxygenaseinmorphinesynthesisN-terminal                                                                                 | 3                                                             | 3                                                           |
| Fattyacidssaturase                                                                                                               | 7                                                             | 7                                                           |
| AlcoholdehydrogenaseGroES-likedomain                                                                                             | 29                                                            | 29                                                          |
| Mre11DNA-bindingpresumeddomain                                                                                                   | 1                                                             | 1                                                           |
| Copperamineoxidase,enzymedomain                                                                                                  | 7                                                             | 7                                                           |
| DNApolymerasealpha/epsilonsubunitB                                                                                               | 3                                                             | 3                                                           |
| RNALigase                                                                                                                        | 5                                                             | 5                                                           |
| DnaJCterminaldomain                                                                                                              | 9                                                             | 9                                                           |
| AdaptinNterminalregion                                                                                                           | 11                                                            | 11                                                          |
| Ubiquitin-bindingdomain                                                                                                          | 1                                                             | 1                                                           |

|                                                           |     |     |
|-----------------------------------------------------------|-----|-----|
| NMDA receptor-regulated protein 1                         | 1   | 1   |
| Ankyrin repeats (3 copies)                                | 11  | 11  |
| BCS1 N-terminal                                           | 5   | 5   |
| Vacuolar sorting protein 9 (VPS9) domain                  | 3   | 3   |
| Protein of unknown function (DUF933)                      | 1   | 1   |
| Transferrin receptor-like dimerisation domain             | 5   | 5   |
| Domain of unknown function (DUF3402)                      | 1   | 1   |
| Fungal specific transcription factor domain               | 127 | 127 |
| Glycosyl hydrolase family 43                              | 17  | 16  |
| Regulator of G protein signaling domain                   | 3   | 3   |
| ATP-NAD kinase C-terminal domain                          | 3   | 3   |
| Domain of unknown function (DUF1929)                      | 3   | 3   |
| Transcription factor TFIID (or TATA-binding protein, TBP) | 1   | 1   |
| Mediator complex subunit 13 C-terminal domain             | 1   | 1   |
| NUC153 domain                                             | 3   | 3   |
| Elongation factor Tu GTP binding domain                   | 15  | 15  |
| 26S proteasome subunit RPN7                               | 3   | 1   |
| EF hand associated                                        | 1   | 1   |
| Formamidopyrimidine-DNA glycosylase H2TH domain           | 1   | 1   |
| FAD binding domain                                        | 67  | 65  |
| E1-E2 ATPase                                              | 11  | 11  |
| C2HE/C2H2/C2HC zinc-binding finger                        | 1   | 1   |
| Helicase associated domain (HA2)                          | 7   | 7   |
| Thiolase, N-terminal domain                               | 9   | 11  |
| Importin beta binding domain                              | 1   | 1   |
| ssDNA-binding domain of telomere protection protein       | 1   | 1   |
| Surfeit locus protein 6                                   | 1   | 1   |
| Hint-domain                                               | 1   | 1   |
| Acetyl-CoA hydrolase/transferase N-terminal domain        | 1   | 1   |
| Mitochondrial carrier protein                             | 60  | 60  |

|                                                    |     |     |
|----------------------------------------------------|-----|-----|
| Dynaminfamily                                      | 7   | 7   |
| MethyltransferaseinvolvedinWilliams-Beurensyndrome | 1   | 1   |
| Thioredoxin-like                                   | 5   | 5   |
| Cupin                                              | 27  | 27  |
| PQlooprepeat                                       | 7   | 7   |
| SNF2-relateddomain                                 | 19  | 19  |
| Enolase,C-terminalTIMbarreldomain                  | 1   | 1   |
| CoenzymeAtransferase                               | 1   | 1   |
| Zincfinger,C2H2type                                | 21  | 21  |
| TATAelementmodulatoryfactor1TATAbinding            | 1   | 1   |
| LIMdomain                                          | 1   | 1   |
| PCIdomain                                          | 13  | 13  |
| Dynamincentralregion                               | 3   | 3   |
| Glutaredoxin                                       | 5   | 5   |
| Proteinkinasedomain                                | 102 | 103 |
| HAT(Half-A-TPR)repeat                              | 1   | 1   |
| snoRNAbindingdomain,fibrillarln                    | 3   | 3   |
| C2domain                                           | 11  | 11  |
| NrapproteinPAP/OAS1-likedomain5                    | 1   | 1   |
| Histidinekinase-,DNAgyraseB-,andHSP90-likeATPase   | 15  | 15  |
| PIGA(GPIanchorbiosynthesis)                        | 1   | 1   |
| Sodium/calciumexchangerprotein                     | 5   | 5   |
| ZincfingerC-x8-C-x5-C-x3-Htype(andsimilar)         | 5   | 5   |
| Syntaxin                                           | 7   | 7   |
| Domainofunknownfunction(DUF3395)                   | 1   | 1   |
| Spa2homologydomain(SHD)ofGIT                       | 1   | 1   |
| OxidoreductaseNAD-bindingdomain                    | 5   | 5   |
| ZIPZinctransporter                                 | 15  | 15  |
| RNApolymeraseRpb1,domain1                          | 3   | 3   |
| WDdomain,G-betarepeat                              | 75  | 73  |

|                                                          |    |    |
|----------------------------------------------------------|----|----|
| Thg1Cterminaldomain                                      | 1  | 1  |
| Prenyltransferaseandsqualeneoxidaserepeat                | 1  | 1  |
| Cid1familypolyApolymerase                                | 3  | 3  |
| ERmembraneproteincomplexsubunit1,C-terminal              | 1  | 1  |
| BiotinandThiaminSynthesisassociateddomain                | 1  | 1  |
| Bromodomain                                              | 7  | 7  |
| Tubulin/FtsZfamily,GTPasedomain                          | 3  | 3  |
| PhoDrelatedphosphatase                                   | 1  | 1  |
| Centrosomemicrotubule-bindingdomainofCep57               | 1  | 1  |
| ATPasefamilyassociatedwithvariouscellularactivities(AAA) | 33 | 33 |
| FFdomain                                                 | 1  | 1  |
| Domainofunknownfunction(DUF4110)                         | 1  | 1  |
| Sulfatepermeasefamily                                    | 5  | 5  |
| UTP15Cterminal                                           | 1  | 1  |
| Maintenanceofmitochondrialstructureandfunction           | 5  | 5  |
| Non-repetitive/WGA-negativenucleoporinC-terminal         | 1  | 1  |
| AFG1-likeATPase                                          | 1  | 1  |
| Oxidoreductasefamily,NAD-bindingRossmannfold             | 13 | 11 |
| FirstLongindomainofFUZ,MON1andHPS1                       | 1  | 1  |
| Tryptophansynthasealphachain                             | 1  | 1  |
| Adenylatekinase                                          | 5  | 5  |
| Zinc-fingerdomainofmonoamine-oxidaseArepressorR1         | 1  | 1  |
| Proteinprenyltransferasealphasubunitrepeat               | 5  | 5  |
| Pex2/Pex12aminoterminalregion                            | 3  | 3  |
| Xrn1helicaldomain                                        | 1  | 1  |
| Actincytoskeleton-regulatorycomplexproteinEND3           | 1  | 1  |
| ReplicationproteinACterminal                             | 1  | 1  |
| mRNACleavageandpolyadenylationfactorCLP1P-loop           | 1  | 1  |
| Lonprotease(S16)C-terminalproteolyticdomain              | 3  | 3  |
| Carbamoyl-phosphatesynthaseLchain,ATPbindingdomain       | 7  | 7  |

|                                                                 |    |    |
|-----------------------------------------------------------------|----|----|
| GHMPkinasesNterminaldomain                                      | 5  | 5  |
| PPRrepeatfamily                                                 | 3  | 3  |
| GTP1/OBG                                                        | 1  | 1  |
| RNAPolymeraseRpb5,C-terminaldomain                              | 1  | 1  |
| WSCdomain                                                       | 9  | 9  |
| Kelchmotif                                                      | 9  | 9  |
| tRNAsynthetaseclassIIcoredomain(G,H,P,SandT)                    | 7  | 7  |
| Pre-mRNA-splicingfactorSF3acomplexsubunit2(Prp11)               | 1  | 1  |
| GNL3L/Grn1putativeGTPase                                        | 1  | 1  |
| RNBdomain                                                       | 5  | 5  |
| Transientreceptorpotential(TRP)ionchannel                       | 9  | 9  |
| Dip2/Utp12Family                                                | 5  | 5  |
| Cationeffluxfamily                                              | 11 | 11 |
| Phosphatidylinositol3-and4-kinase                               | 5  | 5  |
| RibosomalproteinL6                                              | 5  | 5  |
| V-ATPasesubunitH                                                | 1  | 1  |
| XPGI-region                                                     | 1  | 1  |
| Phosphoglucomutase/phosphomannomutase,alpha/beta/alphadomainIII | 1  | 0  |
| AutophagyproteinATG17-likedomain                                | 3  | 3  |
| Man1-Src1p-C-terminaldomain                                     | 1  | 1  |
| Hingedomainofcleavagestimulationfactorsubunit2                  | 1  | 1  |
| Endoplasmicreticulumvesicletransporter                          | 3  | 3  |
| Sel1repeat                                                      | 5  | 5  |
| Proteasomesubunit                                               | 19 | 19 |
| RNAPolymeraseRpb3/Rpb11dimerisationdomain                       | 3  | 3  |
| Zinc-fingerofC2H2type                                           | 1  | 1  |
| ThiFfamily                                                      | 7  | 7  |
| Hydroxymethylglutaryl-coenzymeA reductase                       | 1  | 1  |
| Cullinfamily                                                    | 7  | 7  |
| SaccharopinedehydrogenaseC-terminaldomain                       | 1  | 1  |

|                                                          |    |    |
|----------------------------------------------------------|----|----|
| 8-oxoguanineDNAglycosylase,N-terminaldomain              | 1  | 1  |
| Actin                                                    | 13 | 13 |
| RibosomalS13/S15N-terminaldomain                         | 1  | 1  |
| Synaptobrevin                                            | 5  | 5  |
| Asparaginase                                             | 7  | 7  |
| Adenosinedeaminase                                       | 5  | 5  |
| C3HCzincfinger-like                                      | 1  | 1  |
| C2H2typezinc-finger(2copies)                             | 1  | 1  |
| Ariadnedomain                                            | 1  | 1  |
| XPGN-terminaldomain                                      | 5  | 5  |
| tRNAsynthetasesclassI(EandQ),catalyticdomain             | 5  | 5  |
| Ribonucleotidereductase,barreldomain                     | 1  | 1  |
| ABC-2typetransporter                                     | 9  | 9  |
| Wyosinebaseformation                                     | 1  | 1  |
| Exocystcomponent84C-terminal                             | 1  | 1  |
| pre-mRNAsplicingfactorcomponent                          | 1  | 1  |
| CIDdomain                                                | 5  | 5  |
| DNAgyrase/topoisomeraseIV,subunitA                       | 1  | 1  |
| 40SribosomebiogenesisproteinTsr1andBMS1C-terminal        | 3  | 3  |
| Proteinofunknownfunction(DUF2034)                        | 1  | 1  |
| CellmorphogenesisN-terminal                              | 1  | 1  |
| Exportin1-likeprotein                                    | 1  | 1  |
| chorismatebindingenzyme                                  | 3  | 3  |
| PPIC-typePPIASEdomain                                    | 1  | 1  |
| Vta1like                                                 | 1  | 1  |
| DHHCpalmitoyltransferase                                 | 7  | 7  |
| DNApolymerasealphasubunitBN-terminal                     | 1  | 1  |
| UDP-glucose/GDP-mannosedehydrogenasefamily,centraldomain | 3  | 3  |
| XFPN-terminaldomain                                      | 3  | 3  |
| Catalase                                                 | 3  | 3  |



|                                                          |    |    |
|----------------------------------------------------------|----|----|
| Thiaminepyrophosphateenzyme,N-terminalTPPbindingdomain   | 5  | 5  |
| MgsAAAA+ATPaseCterminal                                  | 1  | 1  |
| Cofilin/tropomyosin-typeactin-bindingprotein             | 7  | 7  |
| tRNAsynthetasesclassI(R)                                 | 1  | 1  |
| Pirin                                                    | 1  | 1  |
| Subtilasefamily                                          | 5  | 5  |
| SecY                                                     | 1  | 1  |
| IPPtransferase                                           | 1  | 1  |
| Dak1domain                                               | 1  | 1  |
| TAF6C-terminalHEATrepeatdomain                           | 1  | 1  |
| FADdependentoxidoreductase                               | 23 | 23 |
| Armadillo/beta-catenin-likerepeat                        | 1  | 1  |
| NAD(P)transhydrogenasebetasubunit                        | 1  | 1  |
| Adaptorcomplexesmediumsubunitfamily                      | 5  | 5  |
| Temperaturedependentprotein affectingM2dsRNAreplication  | 1  | 1  |
| UncharacterizedproteinfamilyUPF0029                      | 3  | 3  |
| ATPsynthasealpha/betafamily,nucleotide-bindingdomain     | 1  | 1  |
| GMCOxidoreductase                                        | 13 | 13 |
| Vps5Cterminallike                                        | 3  | 3  |
| EF-handdomainpair                                        | 5  | 5  |
| Aconitasefamily(aconitatehydratase)                      | 3  | 3  |
| PWIdomain                                                | 3  | 3  |
| HomeoboxKNdomain                                         | 5  | 5  |
| Proteinofunknownfunction(DUF917)                         | 1  | 1  |
| Nse1non-SMCcomponentofSMC5-6complex                      | 1  | 1  |
| Transcription-silencingproteinClr2                       | 1  | 1  |
| 26SproteasomeregulatorysubunitRPN2C-terminaldomain       | 1  | 1  |
| Oxidoreductasemolybdopterinbindingdomain                 | 1  | 1  |
| CationtransportingATPase,C-terminus                      | 5  | 5  |
| EarlytranscriptionelongationfactorofRNAPolIII,NGNsection | 1  | 1  |

|                                                       |    |    |
|-------------------------------------------------------|----|----|
| Sec7domain                                            | 3  | 3  |
| Pre-mRNAsplicingfactor                                | 3  | 3  |
| Beige/BEACHdomain                                     | 1  | 1  |
| Malicenzyme,NADbindingdomain                          | 3  | 3  |
| Metallo-beta-lactamasesuperfamilydomain               | 1  | 1  |
| NB-ARCdomain                                          | 1  | 1  |
| RequiredfornucleartransportofRNAPolIIC-terminus1      | 1  | 1  |
| Domainofunknownfunction(DUF4187)                      | 1  | 1  |
| PRMT5TIMbarreldomain                                  | 1  | 1  |
| Multicopperoxidase                                    | 7  | 7  |
| Flavin-bindingmonooxygenase-like                      | 22 | 22 |
| Aminoacidkinasefamily                                 | 1  | 1  |
| ExocystcomplexcomponentSec10                          | 3  | 3  |
| Eukaryoticglutathionesynthase,ATPbindingdomain        | 1  | 1  |
| RhoGAPdomain                                          | 11 | 11 |
| COMPASS(ComplexproteinsassociatedwithSet1p)componentN | 1  | 1  |
| P5-typeATPasecationtransporter                        | 1  | 1  |
| RibosomalproteinL4/L1family                           | 1  | 1  |
| SEPdomain                                             | 1  | 1  |
| SF3a60/Prp9C-terminal                                 | 1  | 1  |
| CTPsynthaseN-terminus                                 | 1  | 1  |
| ERCC3/RAD25/XPBC-terminalhelicase                     | 1  | 1  |
| F-box-like                                            | 21 | 21 |
| Histidinebiosynthesisprotein                          | 3  | 3  |
| Oxysterol-bindingprotein                              | 7  | 7  |
| CTLH/CRAC-terminaltoLisHmotifdomain                   | 7  | 7  |
| CNHdomain                                             | 1  | 1  |
| ATPsynthasesubunitC                                   | 7  | 7  |
| G-patchdomain                                         | 5  | 5  |
| Proteinofunknownfunction(DUF3433)                     | 9  | 9  |

|                                                      |    |    |
|------------------------------------------------------|----|----|
| Phospholipid-translocatingP-typeATPaseC-terminal     | 7  | 7  |
| Thioredoxin                                          | 15 | 15 |
| Phytochromeregion                                    | 1  | 1  |
| Glycosylhydrolasesfamily32Cterminal                  | 1  | 1  |
| Hexokinase                                           | 5  | 5  |
| RegulatorofTy1transpositionprotein107BRCTdomain      | 1  | 1  |
| Pyridinenucleotide-disulphideoxidoreductase          | 21 | 19 |
| tRNAsynthetasesclassI(M)                             | 1  | 1  |
| TFA2Wingedhelixdomain2                               | 1  | 1  |
| Cytochromeb5-likeHeme/Steroidbindingdomain           | 7  | 7  |
| Domainofunknownfunction(DUF1899)                     | 1  | 1  |
| F-actincappingproteinalphasubunit                    | 1  | 1  |
| Celldivisionproteinanillin                           | 1  | 1  |
| Inositol-pentakisphosphate2-kinase                   | 1  | 1  |
| ABC1atypicalkinase-likedomain                        | 5  | 5  |
| Apoptosis-antagonizingtranscriptionfactor,C-terminal | 1  | 1  |
| Chalconeandstilbenesynthases,C-terminaldomain        | 1  | 1  |
| Rad4transglutaminase-likedomain                      | 5  | 5  |
| linkerbetweenRRM2andRRM3domainsinRBM39protein        | 1  | 1  |
| Clusteredmitochondria                                | 1  | 1  |
| Forkheaddomain                                       | 5  | 5  |
| Tubulindomain                                        | 1  | 1  |
| FGGYfamilyofcarbohydratekinases,C-terminaldomain     | 7  | 7  |
| BING4CT(NUC141)domain                                | 1  | 1  |
| RasGEFdomain                                         | 7  | 7  |
| Cyclophilintypepeptidyl-prolylcis-transisomerase/CLD | 9  | 9  |
| Dcp2,boxAdomain                                      | 1  | 1  |
| PHdomain                                             | 5  | 5  |
| Cdc37Nterminalkinasebinding                          | 1  | 1  |
| Polysaccharidelyasefamily4,domainIII                 | 1  | 1  |

|                                                    |    |    |
|----------------------------------------------------|----|----|
| Domainofunknownfunction(DUF3535)                   | 1  | 1  |
| RecF/RecN/SMCNterminaldomain                       | 7  | 7  |
| X-Prodiptidyl-peptidase(S15family)                 | 1  | 1  |
| Pleckstrinhomologydomain                           | 1  | 1  |
| H2C2zincfinger                                     | 1  | 1  |
| CBSdomain                                          | 1  | 1  |
| ATPdependentDNAligasedomain                        | 5  | 5  |
| Tetratricopeptiderepeat                            | 11 | 11 |
| Glycosidehydrolasefamily5C-terminaldomain          | 3  | 3  |
| MutSdomainV                                        | 3  | 3  |
| non-SMCmitoticcondensationcomplexsubunit1,N-term   | 1  | 1  |
| NLIinteractingfactor-likephosphatase               | 7  | 7  |
| FADlinkedoxidases,C-terminaldomain                 | 3  | 3  |
| Velvetfactor                                       | 1  | 1  |
| Cytochromedomainofcellobiosedehydrogenase          | 3  | 3  |
| Glycosylhydrolasefamily3C-terminaldomain           | 11 | 11 |
| Anaphasepromotingcomplexsubunit8/Cdc23             | 1  | 1  |
| Utp13specificWD40associateddomain                  | 1  | 1  |
| AIRcarboxylase                                     | 1  | 1  |
| Asparaginase,N-terminal                            | 3  | 3  |
| Histone-bindingproteinRBBP4orsubunitCofCAF1complex | 3  | 3  |
| Signalpeptidasesubunit                             | 1  | 1  |
| Originrecognitioncomplex(ORC)subunit5C-terminus    | 1  | 1  |
| AhpC/TSAfamily                                     | 5  | 5  |
| Vacuolarsortingprotein39domain1                    | 1  | 1  |
| 6-phosphofructo-2-kinase                           | 5  | 5  |
| Mad3/BUB1homologyregion1                           | 1  | 1  |
| ATPphosphoribosyltransferase                       | 1  | 1  |
| Iontransportprotein                                | 3  | 3  |
| D-aminopeptidase,domainB                           | 1  | 1  |

|                                                                  |    |    |
|------------------------------------------------------------------|----|----|
| 3-hydroxyacyl-CoA dehydrogenase, NAD binding domain              | 3  | 3  |
| Sulfatase                                                        | 13 | 13 |
| Peptidase family M41                                             | 3  | 3  |
| Pyrroline-5-carboxylate reductase dimerisation                   | 3  | 3  |
| NLE (NUC135) domain                                              | 1  | 1  |
| CAP-Gly domain                                                   | 3  | 3  |
| Lyase                                                            | 5  | 5  |
| Ribosomal protein L10                                            | 3  | 3  |
| twin BRCT domain                                                 | 1  | 1  |
| Cullin binding                                                   | 1  | 1  |
| Sorting nexin 8/Mvp1 BAR domain                                  | 1  | 1  |
| Family of unknown function (DUF5923)                             | 3  | 3  |
| Glycosyl hydrolases family 38 N-terminal domain                  | 1  | 1  |
| eRF1 domain 1                                                    | 1  | 1  |
| TIP49P-loop domain                                               | 3  | 3  |
| PHD-zinc-finger like domain                                      | 3  | 3  |
| RAM signalling pathway protein                                   | 1  | 1  |
| RNA polymerase III subunit RPC82                                 | 1  | 1  |
| Mitochondrial branched-chain alpha-ketoacid dehydrogenase kinase | 5  | 5  |
| Ribosomal protein S5, C-terminal domain                          | 1  | 1  |
| Initiation factor eIF2gamma, C-terminal                          | 1  | 1  |
| CSL zinc finger                                                  | 1  | 1  |
| Phosphatidylserine decarboxylase                                 | 3  | 3  |
| AAA domain (Cdc48 subfamily)                                     | 5  | 5  |
| Mis6                                                             | 1  | 1  |
| Alpha amylase, C-terminal all-beta domain                        | 1  | 1  |
| TFIIHp62 subunit, N-terminal domain                              | 1  | 1  |
| Transketolase, pyrimidine binding domain                         | 1  | 1  |
| tRNA synthetases class I (I, L, M and V)                         | 5  | 5  |
| Cupin-like domain                                                | 5  | 5  |

|                                                                  |    |    |
|------------------------------------------------------------------|----|----|
| Domainofunknownfunction(DUF3384)                                 | 1  | 1  |
| DEAD_2                                                           | 1  | 1  |
| DDHDdomain                                                       | 1  | 1  |
| pre-mRNAprocessingfactor3(PRP3)                                  | 1  | 1  |
| RNAPolymeraseRpb1,domain5                                        | 1  | 1  |
| Domainofunknownfunction(DUF1932)                                 | 1  | 1  |
| Glyceraldehyde3-phosphatedehydrogenase,C-terminaldomain          | 1  | 1  |
| SART-1family                                                     | 1  | 1  |
| Aspartate/ornithinecarbamoyltransferase,carbamoyl-Pbindingdomain | 1  | 1  |
| Smallsubunitofacetolactatesynthase                               | 1  | 1  |
| CAS/CSEprotein,C-terminus                                        | 1  | 1  |
| Cse1                                                             | 1  | 1  |
| ELMO/CED-12family                                                | 1  | 1  |
| Aminoacidpermease                                                | 23 | 23 |
| AAAdomain                                                        | 11 | 11 |
| EukaryoticDNAtopoisomeraseI,catalyticcore                        | 1  | 1  |
| KHdomain                                                         | 7  | 7  |
| UPF0113Pre-PUAdomain                                             | 1  | 1  |
| Anticodonbindingdomain                                           | 3  | 3  |
| RNArecognitionmotif.(a.k.a.RRM,RBD,orRNPdomain)                  | 41 | 41 |
| PULdomain                                                        | 1  | 1  |
| LD-carboxypeptidaseC-terminaldomain                              | 1  | 1  |
| Dioxygenase                                                      | 9  | 9  |
| Glutamate/Leucine/Phenylalanine/Valinedehydrogenase              | 3  | 3  |
| DNAPolymerasefamilyB                                             | 5  | 5  |
| Zinc-bindingdehydrogenase                                        | 23 | 23 |
| Oxidoreductasefamily,C-terminalalpha/betadomain                  | 1  | 1  |
| Glycosylhydrolasesfamily2,TIMbarreldomain                        | 1  | 1  |
| Fructose-1-6-bisphosphatase,C-terminaldomain                     | 1  | 1  |
| Righthandedbetahelixregion                                       | 1  | 1  |

|                                                      |    |    |
|------------------------------------------------------|----|----|
| BacteroidetesVLRf1releasefactor                      | 1  | 1  |
| MmgE/PrpDN-terminaldomain                            | 1  | 1  |
| FADbindingdomainofDNAphotolyase                      | 3  | 3  |
| FAD-bindingdomain                                    | 3  | 3  |
| CytochromeP450                                       | 39 | 37 |
| OxidoreductaseFAD-bindingdomain                      | 1  | 1  |
| SWIB/MDM2domain                                      | 3  | 3  |
| PrpFprotein                                          | 1  | 1  |
| Ringfingerdomain                                     | 7  | 7  |
| Semialdehydedehydrogenase,dimerisationdomain         | 1  | 1  |
| Domainofunknownfunction(DUF1996)                     | 7  | 7  |
| alpha/betahydrolasefold                              | 47 | 45 |
| Iron/manganesesuperoxidedismutases,C-terminaldomain  | 3  | 3  |
| Calcineurin-likephosphoesterase                      | 17 | 15 |
| RING/Uboxlikezinc-bindingdomain                      | 1  | 1  |
| Ionchannel                                           | 1  | 1  |
| ABCtransportertransmembraneregion                    | 17 | 17 |
| MannitoldehydrogenaseC-terminaldomain                | 1  | 1  |
| HydrolyticATPbindingsiteofdyneinmotorregion          | 1  | 1  |
| Proteinofunknownfunction(DUF3955)                    | 1  | 1  |
| Ribosome-associatedcomplexheaddomain                 | 1  | 1  |
| Shikimatedehydrogenasesubstratebindingdomain         | 3  | 3  |
| Synaptotagmin-like mitochondrial-lipid-bindingdomain | 1  | 1  |
| DNA-dependentRNAPolymerase                           | 1  | 1  |
| CobW/HypB/UreG,nucleotide-bindingdomain              | 7  | 7  |
| SacIhomologydomain                                   | 7  | 7  |
| Chitin synthase                                      | 16 | 16 |
| Phosphatidylserinedecarboxylase                      | 3  | 3  |
| Cellulase(glycosylhydrolasefamily5)                  | 9  | 9  |
| Nup133Nterminallike                                  | 1  | 1  |

|                                                            |    |    |
|------------------------------------------------------------|----|----|
| SterolmethyltransferaseC-terminal                          | 1  | 1  |
| Galactose-1-phosphateuridylyltransferase,N-terminaldomain  | 1  | 1  |
| 5'-AMP-activatedproteinkinasebetasubunit,interactiondomain | 1  | 1  |
| EXSfamily                                                  | 1  | 1  |
| Pumilio-familyRNAbindingrepeat                             | 5  | 5  |
| Histidine-specificmethyltransferase,SAM-dependent          | 3  | 3  |
| GammatubulincomplexcomponentN-terminal                     | 5  | 5  |
| Sodium:neurotransmittersymporterfamily                     | 3  | 3  |
| Cyclin                                                     | 13 | 13 |
| Commoncentraldomainoftyrosinase                            | 5  | 5  |
| RNAPolymeraseRpb2,domain6                                  | 3  | 3  |
| RhoGEFdomain                                               | 3  | 3  |
| NADH-ubiquinoneoxidoreductasecomplexI,21kDasubunit         | 1  | 1  |
| DipeptidylpeptidaseIV(DPPIV)N-terminalregion               | 1  | 1  |
| ProteinsimilartoCwfJC-terminus1                            | 3  | 3  |
| RegioninClathrinandVPS                                     | 3  | 3  |
| C-terminalregionofeIF3h                                    | 1  | 1  |
| 2Fe-2Siron-sulfurclusterbindingdomain                      | 3  | 3  |
| ALG6,ALG8glycosyltransferasefamily                         | 1  | 1  |
| RNAPolymeraseIIIsubunitRpc25                               | 1  | 1  |
| Dos2-interactingtranscriptionregulatorofRNA-Pol-II         | 1  | 1  |
| N-terminaldomainofoxidoreductase                           | 1  | 1  |
| Glycosylhydrolasesfamily18                                 | 11 | 9  |
| ATP-dependentproteaseLa(LON)substrate-bindingdomain        | 1  | 1  |
| CDK-activatingkinaseassemblyfactorMAT1                     | 1  | 1  |
| impB/mucB/samBfamily                                       | 1  | 1  |
| NUDIXdomain                                                | 7  | 7  |
| CAF1familyribonuclease                                     | 1  | 1  |
| tRNAsynthetasesclassII(A)                                  | 1  | 1  |
| TranscriptionfactorS-II(TFIIS),centraldomain               | 1  | 1  |



|                                                     |    |    |
|-----------------------------------------------------|----|----|
| SRI(Set2Rpb1interacting)domain                      | 1  | 1  |
| Sas10C-terminaldomain                               | 1  | 1  |
| FungalZn(2)-Cys(6)binuclearclusterdomain            | 45 | 45 |
| Domainofunknownfunction(DUF3543)                    | 1  | 1  |
| Pyridoxal-phosphatedependentenzyme                  | 13 | 13 |
| Ribosomal_S17N-terminal                             | 1  | 1  |
| Spc7kinetochoreprotein                              | 1  | 1  |
| Prefoldin subunit                                   | 5  | 5  |
| Mitochondrialinnermembraneprotein                   | 1  | 1  |
| Outermitochondrialmembranetransportcomplexprotein   | 1  | 1  |
| Kinesinmotordomain                                  | 15 | 15 |
| Acetohydroxyacidisomeroeductase,NADPH-bindingdomain | 1  | 1  |
| GNATacetyltransferase2                              | 1  | 1  |
| Amidohydrolasefamily                                | 19 | 19 |
| Proteinofunknownfunction(DUF3419)                   | 1  | 1  |
| tRNAsynthetasesclassI(WandY)                        | 3  | 3  |
| Nitrogenpermeaseregulator2                          | 1  | 1  |
| Ubiquitinfamily                                     | 3  | 3  |
| Replicationfactor-ACterminaldomain                  | 1  | 1  |
| STI1domain                                          | 1  | 1  |
| GlutathioneS-transferase,N-terminaldomain           | 17 | 17 |
| Polysaccharidelyasefamily4,domainII                 | 3  | 3  |
| JAB1/Mov34/MPN/PAD-1ubiquitinprotease               | 3  | 3  |
| UnstructuredregiononcNMP-bindingprotein             | 1  | 1  |
| Ladomain                                            | 3  | 3  |
| Ribosome60SbiogenesisN-terminal                     | 1  | 1  |
| BARdomain                                           | 7  | 7  |
| NADbindingdomainof6-phosphogluconatedehydrogenase   | 1  | 1  |
| PhosphatidylinositolglycanclassN(PIG-N)             | 1  | 1  |
| MutLCterminaldimerisationdomain                     | 1  | 1  |

|                                                       |    |    |
|-------------------------------------------------------|----|----|
| Coiled-coildomaincontainingprotein(DUF2052)           | 1  | 1  |
| Electrontransferflavoproteindomain                    | 3  | 3  |
| SWIRMdomain                                           | 3  | 3  |
| MCMP-loopdomain                                       | 5  | 5  |
| 2'-5'RNAligasesuperfamily                             | 1  | 1  |
| Myb-likeDNA-bindingdomain                             | 7  | 7  |
| Anaphase-promotingcomplexsubunit4WD40domain           | 3  | 3  |
| HEAT-likerepeat                                       | 5  | 5  |
| Metallo-peptidasefamilyM12                            | 1  | 1  |
| ReplicationfactorRFC1Cterminaldomain                  | 1  | 1  |
| 26SproteasomeregulatorysubunitRPN6N-terminaldomain    | 1  | 1  |
| Lariatdebranchingenzyme,C-terminaldomain              | 1  | 1  |
| Anaphase-promotingcomplex,cyclosome,subunit3          | 5  | 5  |
| KinetochoresCENP-Cfungalhomologue,Mif2,N-terminal     | 1  | 1  |
| FATdomain                                             | 3  | 3  |
| RaffinosesynthaseorseedimbibitionproteinSip1          | 1  | 1  |
| Insulinase(PeptidasefamilyM16)                        | 1  | 1  |
| Histidinoldehydrogenase                               | 1  | 1  |
| LNS2(Lipin/Ned1/Smp2)                                 | 1  | 1  |
| tRNAsynthetasesclassII(D,KandN)                       | 7  | 7  |
| HelicaseconservedC-terminaldomain                     | 1  | 1  |
| Zinc-binding                                          | 25 | 25 |
| Bap31/Bap29transmembraneregion                        | 1  | 1  |
| EZH2N-terminaldomain                                  | 1  | 1  |
| Fumarylacetoacetate(FAA)hydrolasefamily               | 5  | 5  |
| S4domain                                              | 5  | 5  |
| Ubiquitin-likemodifier-activatingenzymeATG7N-terminus | 1  | 1  |
| Galactoseoxidase,centraldomain                        | 3  | 3  |
| PutativeIgdomain                                      | 1  | 1  |
| PRP1splicingfactor,N-terminal                         | 1  | 1  |

|                                                                   |    |    |
|-------------------------------------------------------------------|----|----|
| GatB/GatEcatalyticdomain                                          | 1  | 1  |
| SNAREdomain                                                       | 3  | 3  |
| Tetrahydrofolatedehydrogenase/cyclohydrolase,NAD(P)-bindingdomain | 1  | 1  |
| HECT-domain(ubiquitin-transferase)                                | 5  | 5  |
| HydantoinaseB/oxoprolinase                                        | 1  | 1  |
| eIF3subunit6Nterminaldomain                                       | 1  | 1  |
| PeptidasefamilyM1domain                                           | 5  | 5  |
| PXAdomain                                                         | 5  | 5  |
| Multiproteinbridgingfactor1                                       | 1  | 1  |
| PHD/FYVE-zinc-fingerlikedomain                                    | 1  | 1  |
| Formyltransferase                                                 | 5  | 5  |
| Cytokine-inducedanti-apoptosisinhibitor1,Fe-Sbiogenesis           | 1  | 1  |
| Aft1HRRdomain                                                     | 1  | 1  |
| RibosomalproteinL23,N-terminaldomain                              | 1  | 1  |
| Neutral/alkalinenon-lysosomalceramidase,N-terminal                | 1  | 1  |
| TupN-terminal                                                     | 1  | 1  |
| lactate/malatedehydrogenase,alpha/betaC-terminaldomain            | 3  | 3  |
| Phosphoribosylglycinamidesynthetase,ATP-grasp(A)domain            | 1  | 1  |
| PINITdomain                                                       | 1  | 1  |
| GPIethanolaminephosphatetransferasemembraneregion                 | 1  | 1  |
| POB3-likeN-terminalPHdomain                                       | 1  | 1  |
| ATP-utilisingchromatinassemblyandremodellingN-terminal            | 1  | 1  |
| MetallopeptidasefamilyM24                                         | 11 | 11 |
| Dolichyl-phosphate-mannose-proteinmannosyltransferase             | 5  | 5  |
| Prp18domain                                                       | 1  | 1  |
| PROCN(NUC071)domain                                               | 1  | 1  |
| KetopantoatereductasePanE/ApbACterminal                           | 5  | 5  |
| RibosomalL30N-terminaldomain                                      | 1  | 1  |
| Glutaminesynthetase,catalyticdomain                               | 1  | 1  |

|                                               |    |    |
|-----------------------------------------------|----|----|
| Brf1-likeTBP-bindingdomain                    | 1  | 1  |
| EamA-liketransporterfamily                    | 1  | 1  |
| Animalhaemperoxidase                          | 3  | 3  |
| TubulinbindingcofactorC                       | 1  | 1  |
| BPG-independentPGAMN-terminus(iPGM_N)         | 1  | 1  |
| SEN1Nterminal                                 | 1  | 1  |
| Pre-mRNAsplicingfactorPRP21likeprotein        | 1  | 1  |
| FibronectintypeIIIdomain                      | 3  | 3  |
| 3'-5'exonuclease                              | 1  | 1  |
| D-arabinono-1,4-lactoneoxidase                | 1  | 1  |
| bZIPtranscriptionfactor                       | 9  | 9  |
| Septin                                        | 7  | 7  |
| RibosomalfamilyS4e                            | 1  | 1  |
| Myosinhead(motordomain)                       | 3  | 3  |
| Tudordomain                                   | 3  | 3  |
| LeucineRichrepeat                             | 7  | 7  |
| ProteasomeregulatorysubunitC-terminal         | 1  | 1  |
| Beta-ketoacylsynthase,N-terminaldomain        | 1  | 1  |
| Amidase                                       | 11 | 11 |
| C-terminalregionofMMR_HSR1domain              | 1  | 1  |
| CRM1Cterminal                                 | 1  | 1  |
| ATP-graspdomain                               | 1  | 1  |
| Arginine-tRNA-proteintransferase,Cterminus    | 1  | 1  |
| Histidinephosphatasesuperfamily(branch1)      | 7  | 7  |
| Mitochondrialproteinup-regulatedduringmeiosis | 1  | 1  |
| Minichromosomelossprotein,Mcl1,middleregion   | 1  | 1  |
| ATPcitratelasecitrate-binding                 | 1  | 1  |
| Syntaxin-likeprotein                          | 1  | 1  |
| ALG11mannosyltransferaseN-terminus            | 1  | 1  |
| Scd6-likeSmdomain                             | 1  | 1  |

|                                                 |    |    |
|-------------------------------------------------|----|----|
| RibosomalproteinsL26eukaryotic,L24Parchaeal     | 1  | 1  |
| Phosphoribosylsynthetase-associateddomain       | 1  | 1  |
| DRGFamilyRegulatoryProteins,Tma46               | 1  | 1  |
| Cobalamin-independentsynthase,Catalyticdomain   | 5  | 5  |
| Acyl-CoAdehydrogenase,N-terminaldomain          | 1  | 1  |
| Sec23/Sec24trunkdomain                          | 3  | 3  |
| Domainofunknownfunction(DUF1771)                | 1  | 1  |
| SETdomain                                       | 9  | 11 |
| YjeF-relatedproteinN-terminus                   | 3  | 3  |
| DNAmitochondrialpolymeraseexonucleasedomain     | 1  | 1  |
| Glycosyltransferasefamily28N-terminaldomain     | 1  | 1  |
| 3'exoribonucleasefamily,domain1                 | 11 | 11 |
| KRI1-likefamily                                 | 1  | 1  |
| Caspasedomain                                   | 3  | 3  |
| Eukaryoticaspartylprotease                      | 13 | 13 |
| Nucleolarcomplex-associatedprotein              | 1  | 1  |
| Torusdomain                                     | 1  | 1  |
| RibosomalproteinS3,C-terminaldomain             | 1  | 1  |
| DomainfoundinIF2B/IF5                           | 1  | 1  |
| THOcomplexsubunit1transcriptionelongationfactor | 1  | 1  |
| DKCLD(NUC011)domain                             | 1  | 1  |
| DOCKN-terminus                                  | 1  | 1  |
| VHSdomain                                       | 3  | 3  |
| ReplicationfactorCC-terminaldomain              | 3  | 3  |
| ExosomecomponentEXOSC1/CSL4                     | 1  | 1  |
| MIF4Glike                                       | 1  | 1  |
| Nucleotideexchange factorFes1                   | 1  | 1  |
| DomainofunknownfunctioninPX-proteins(DUF3818)   | 1  | 1  |
| Responseregulatorreceiverdomain                 | 3  | 3  |
| BTB/POZdomain                                   | 13 | 13 |

|                                                              |    |    |
|--------------------------------------------------------------|----|----|
| ICP0-bindingdomainofUbiquitin-specificprotease7              | 1  | 1  |
| PPP5TPRrepeatregion                                          | 1  | 1  |
| MediatorcomplexsubunitMed5                                   | 1  | 1  |
| Nuclearprotein96                                             | 1  | 1  |
| shortchaindehydrogenase                                      | 63 | 64 |
| Pyridoxine5'-phosphateoxidaseC-terminaldimerisationregion    | 1  | 1  |
| Ssl1-like                                                    | 1  | 1  |
| Glyoxalase/Bleomycinresistanceprotein/Dioxygenasesuperfamily | 3  | 3  |
| Cyclicnucleotide-bindingdomain                               | 3  | 3  |
| TranscriptioninitiationfactorIIA,gammasubunit                | 1  | 1  |
| MOZ/SASfamily                                                | 3  | 3  |
| Voltagegatedchloridechannel                                  | 3  | 3  |
| Fis1C-terminaltetratricopeptiderepeat                        | 1  | 1  |
| Ku70/Ku80beta-barreldomain                                   | 1  | 1  |
| FattyacidsynthasetypeIhelicaldomain                          | 1  | 1  |
| FMN-dependentdehydrogenase                                   | 5  | 5  |
| BRO1-likedomain                                              | 1  | 1  |
| TUP1-likeenhancerofsplit                                     | 1  | 1  |
| PP-loopfamily                                                | 1  | 1  |
| Nucleotidyltransferase                                       | 5  | 5  |
| SPOCdomain                                                   | 1  | 1  |
| WWdomain                                                     | 7  | 7  |
| NGP1NT(NUC091)domain                                         | 1  | 1  |
| PDZ-likedomain                                               | 5  | 5  |
| RPELrepeat                                                   | 1  | 1  |
| Nup93/Nic96                                                  | 1  | 1  |
| VTCdomain                                                    | 3  | 3  |
| Glutamineamidotransferasesclass-II                           | 1  | 1  |
| Sof1-likedomain                                              | 1  | 1  |
| RNApolymeraseRpb3/RpoAinsertdomain                           | 1  | 1  |

|                                                          |    |    |
|----------------------------------------------------------|----|----|
| Ferredoxin-foldanticodonbindingdomain                    | 1  | 1  |
| Smg-4/UPF3family                                         | 1  | 1  |
| ZPR1zinc-fingerdomain                                    | 1  | 1  |
| Glycerophosphoryldiesterphosphodiesterasefamily          | 3  | 3  |
| 2OG-Fe(II)oxygenasesuperfamily                           | 9  | 9  |
| Enoyl-CoAhydratase/isomerase                             | 19 | 19 |
| Aluminiumactivatedmalatetransporter                      | 1  | 1  |
| Utp21specificWD40associatedputativedomain                | 1  | 1  |
| Histidinephosphatasesuperfamily(branch2)                 | 9  | 9  |
| MOSCdomain                                               | 3  | 3  |
| Blt1N-terminaldomain                                     | 1  | 1  |
| Svf1-likeC-terminallipocalin-likedomain                  | 1  | 1  |
| Phospholipidmethyltransferase                            | 3  | 3  |
| Eukaryotictranslationinitiationfactor3subunitG           | 1  | 1  |
| Peptidasedimerisationdomain                              | 1  | 1  |
| Putativethreonine/serineexporter                         | 3  | 3  |
| NAD-dependentglycerol-3-phosphatedehydrogenaseC-terminus | 1  | 1  |
| Thiaminpyrophosphokinase,catalyticdomain                 | 1  | 1  |
| Putativeserinedehydratasedomain                          | 1  | 1  |
| Pro-kumamolisin,activationdomain                         | 3  | 3  |
| Sir2family                                               | 9  | 9  |
| Nitriteandsulphitereductase4Fe-4Sdomain                  | 1  | 1  |
| tRNAmethyltransferasecomplexGCD14subunit                 | 1  | 1  |
| MitochondrialproteinfromFMP27                            | 1  | 1  |
| AbscisicacidG-proteincoupledreceptor                     | 1  | 1  |
| PeptidaseM16inactivedomain                               | 1  | 1  |
| FACTcomplexsubunit(SPT16/CDC68)                          | 1  | 1  |
| ANTHdomain                                               | 1  | 1  |
| S1RNAbindingdomain                                       | 1  | 1  |
| GlucoseinhibiteddivisionproteinA                         | 1  | 0  |

|                                                         |    |    |
|---------------------------------------------------------|----|----|
| Tyrosyl-DNAphosphodiesterase                            | 1  | 1  |
| Glycosylhydrolasefamily63C-terminaldomain               | 3  | 3  |
| Creatinase/ProlidaseN-terminaldomain                    | 1  | 1  |
| Proteinofunknownfunction(Ytp1)                          | 3  | 3  |
| AnticodonbindingdomainoftRNAs                           | 1  | 1  |
| WD40associatedregioninTFIIDsubunit,NTD2domain           | 1  | 1  |
| Hsp90protein                                            | 1  | 1  |
| Glucanosyltransferase                                   | 5  | 5  |
| Ubiquitin-conjugatingenzyme                             | 25 | 25 |
| CoAbindingdomain                                        | 3  | 3  |
| Radical_SAMC-terminaldomain                             | 1  | 1  |
| TaurinecatabolismdioxygenaseTauD,TfdAfamily             | 14 | 14 |
| AlphagalactosidaseA                                     | 3  | 3  |
| SGSdomain                                               | 1  | 1  |
| 5'-nucleotidase,C-terminaldomain                        | 3  | 3  |
| Acyltransferase                                         | 9  | 9  |
| Glutamineamidotransferaseclass-I                        | 5  | 5  |
| Quinolatephosphoribosyltransferase,C-terminaldomain     | 1  | 1  |
| Nucleoporincomplexsubunit54                             | 1  | 1  |
| Haloaciddehalogenase-likehydrolase                      | 19 | 19 |
| Choline/ethanolaminekinase                              | 3  | 3  |
| ActivatorofHsp90ATPase,N-terminal                       | 1  | 1  |
| Ydr279pproteinfamily(RNaseH2complexcomponent)wHTHdomain | 1  | 1  |
| Tubulin-tyrosineligasefamily                            | 3  | 3  |
| Fusaricacidresistanceprotein-like                       | 5  | 5  |
| Las17-bindingproteinactinregulator                      | 5  | 5  |
| Phosphofructokinase                                     | 1  | 1  |
| Pectatylasesuperfamilyprotein                           | 1  | 1  |
| EB1-likeC-terminalmotif                                 | 1  | 1  |
| Beta-lactamasesuperfamilydomain                         | 3  | 3  |



|                                                             |     |     |
|-------------------------------------------------------------|-----|-----|
| DENNdomain-containingprotein11                              | 1   | 1   |
| DnaJdomain                                                  | 19  | 19  |
| Exportin-T                                                  | 1   | 1   |
| DockingdomainofAfi1forArf3invesicletrafficking              | 1   | 1   |
| Sugar(andothert)transporter                                 | 111 | 108 |
| Cyclin,N-terminaldomain                                     | 3   | 3   |
| RibosomalProteinsL2,C-terminaldomain                        | 3   | 3   |
| RNA-binding,Nab2-typezincfinger                             | 1   | 1   |
| CRAL/TRIOdomain                                             | 3   | 3   |
| Thioredoxin-likedomain                                      | 1   | 1   |
| Alphaamylase,catalyticdomain                                | 3   | 3   |
| Proteinphosphatase2C                                        | 9   | 9   |
| CHORD                                                       | 1   | 1   |
| SHS2domainfoundinNterminusofRpb7p/Rpc25p/MJ0397             | 1   | 1   |
| NPL4family                                                  | 1   | 1   |
| RNApolymeraseIIItranscriptionfactor(TF)IIICsubunitHTHdomain | 1   | 1   |
| Originrecognitioncomplex(ORC)subunit3N-terminus             | 1   | 1   |
| Sec63Brldomain                                              | 1   | 1   |
| SISdomain                                                   | 1   | 1   |
| Proteolysis_6C-terminal                                     | 1   | 1   |
| Glutathione-dependentformaldehyde-activatingenzyme          | 13  | 13  |
| Phosphoglucomutase/phosphomannomutase,C-terminaldomain      | 1   | 1   |
| Lumazinebindingdomain                                       | 1   | 1   |
| TFIIF,betasubunitN-terminus                                 | 1   | 1   |
| 6-phosphogluconatedehydrogenase,C-terminaldomain            | 1   | 1   |
| Glycosylhydrolasesfamily15                                  | 1   | 1   |
| tRNAsynthetasesclassIIcoredomain(F)                         | 1   | 1   |
| RNA3'-terminalphosphatecyclase                              | 1   | 1   |
| CAAXprenylproteaseN-terminal,fivemembranehelices            | 1   | 1   |
| PITHdomain                                                  | 1   | 1   |

|                                                           |   |   |
|-----------------------------------------------------------|---|---|
| ribosomalL5PfamilyC-terminus                              | 1 | 1 |
| PeptidaseM16Cassociated                                   | 1 | 1 |
| Pyridoxal-dependentdecarboxylase,pyridoxalbindingdomain   | 1 | 1 |
| Nucleoplasmin-likedomain                                  | 1 | 1 |
| Proliferatingcellnuclearantigen,N-terminaldomain          | 1 | 1 |
| Acetyl-CoAcarboxylase,centralregion                       | 1 | 1 |
| Mevalonate5-diphosphatedecarboxylaseC-terminaldomain      | 1 | 1 |
| Phosphoadenosinephosphosulfatereductasefamily             | 3 | 3 |
| Sortilin,neurotensinreceptor3,                            | 1 | 1 |
| Oligonucleotide/oligosaccharide-binding(OB)-fold          | 1 | 1 |
| KilA-Ndomain                                              | 1 | 1 |
| Fes/CIP4,andEFC/F-BARhomologydomain                       | 1 | 1 |
| GTPase-activatorproteinforRas-likeGTPase                  | 3 | 3 |
| IEC3subunitoftheIno80complex,chromatinre-modelling        | 1 | 1 |
| Prolyl-tRNAsynthetase,C-terminal                          | 1 | 1 |
| Mono-functionalDNA-alkylatingmethyImethanesulfonateN-term | 3 | 3 |
| FissionyeastcentromereproteinN-terminaldomain             | 1 | 1 |
| AN1-likeZincfinger                                        | 3 | 3 |
| Regulated-SNARE-likedomain                                | 1 | 1 |
| Asparaginesynthase                                        | 3 | 3 |
| Nuf2family                                                | 1 | 1 |
| Ubiquitin-activatingenzymeactivesite                      | 1 | 1 |
| Glycosyltransferasefamily,a/bdomain                       | 1 | 1 |
| Familyofunknownfunction(DUF6314)                          | 1 | 1 |
| TranscriptionfactorTFIIBrepeat                            | 1 | 1 |
| Glycogendebranchingenzyme,glucanotransferasedomain        | 1 | 1 |
| Pterinbindingenzyme                                       | 1 | 1 |
| F-boxonlyproteinC-terminalregion                          | 1 | 1 |
| C-terminaldomainofSin3aprotein                            | 1 | 1 |
| 16SrRNAmethyltransferaseRsmB/F                            | 1 | 1 |

|                                                    |   |   |
|----------------------------------------------------|---|---|
| Dfp1/Him1,centralregion                            | 1 | 1 |
| Dimerisationandcyclophilin-bindingdomainofMon2     | 1 | 1 |
| N-terminaldomainofribosephosphatepyrophosphokinase | 1 | 1 |
| SPFHdomain/Band7family                             | 9 | 9 |
| Homoserinedehydrogenase                            | 1 | 1 |
| Fructose-1-6-bisphosphatase,N-terminaldomain       | 1 | 1 |
| Proteinofunknownfunction(DUF1604)                  | 1 | 1 |
| Hydroxymethylglutaryl-coenzymeAsynthaseCterminal   | 1 | 1 |
| Peroxin13,N-terminalregion                         | 1 | 1 |
| Niemann-PickC1Nterminus                            | 1 | 1 |
| Respiratory-chainNADHdehydrogenase51Kdsubunit      | 1 | 1 |
| Myo-inositol-1-phosphatesynthase                   | 1 | 1 |
| Glycosylhydrolasefamily47                          | 9 | 9 |
| GTPaseofunknownfunctionC-terminal                  | 1 | 1 |
| PhospholipaseDActivesitemotif                      | 1 | 1 |
| GammatubulincomplexcomponentC-terminal             | 1 | 1 |
| Trehalase                                          | 3 | 3 |
| PeptidasefamilyM20/M25/M40                         | 1 | 1 |
| EnolaseC-terminaldomain-like                       | 3 | 3 |
| OccludedRNA-recognitionmotif                       | 1 | 1 |
| Generalcontrolnonderepressible1(Gcn1)N-terminal    | 1 | 1 |
| TranscriptionfactorTFIIDcomplexsubunit8C-term      | 1 | 1 |
| Calponinology(CH)domain                            | 1 | 1 |
| CrcB-likeprotein,CamphorResistance(CrcB)           | 1 | 1 |
| UncharacterizedproteinfamilyUPF0016                | 1 | 1 |
| Uricase                                            | 1 | 1 |
| Heavy-metal-associateddomain                       | 3 | 3 |
| PB1domain                                          | 1 | 1 |
| SAMdomain(Sterilealphamotif)                       | 7 | 7 |
| Galactokinasegalactose-bindingsignature            | 1 | 1 |

|                                                              |   |   |
|--------------------------------------------------------------|---|---|
| X-domainofDnaJ-containing                                    | 1 | 1 |
| Myristoyl-CoA:proteinN-myristoyltransferase,C-terminaldomain | 1 | 1 |
| TLD                                                          | 3 | 3 |
| Zincfinger,ZZtype                                            | 1 | 1 |
| TLCdomain                                                    | 3 | 3 |
| Ribosomallargesubunitproteins60SL5,and50SL18                 | 1 | 1 |
| NIPSNAP                                                      | 1 | 1 |
| CobB/CobQ-likeglutamineamidotransferasedomain                | 1 | 1 |
| Tetrapyrrole(Corrin/Porphyrin)Methylases                     | 3 | 3 |
| TAPC-terminaldomain                                          | 1 | 1 |
| Acyl-CoAoxidase                                              | 1 | 1 |
| Dualspecificityproteinphosphatase,N-terminalhalf             | 1 | 1 |
| ATP-sulfurylase                                              | 1 | 1 |
| CentrosominN-terminalmotif1                                  | 5 | 5 |
| SDA1                                                         | 1 | 1 |
| Innermembranecomponentdomain                                 | 1 | 1 |
| MolybdetetraporterofMFSsuperfamily                           | 1 | 1 |
| Domainofunknownfunction(DUF1977)                             | 1 | 1 |
| CorehistoneH2A/H2B/H3/H4                                     | 5 | 5 |
| R3Hdomain                                                    | 3 | 3 |
| rRNA-processingarchdomain                                    | 1 | 1 |
| DUF2407C-terminaldomain                                      | 1 | 1 |
| Fourhelicalbundledomain                                      | 1 | 1 |
| Domainofunknownfunction(DUF3336)                             | 3 | 3 |
| Ankyrinrepeats(manycopies)                                   | 5 | 5 |
| PutativeNAD(P)-binding                                       | 1 | 1 |
| Glycosyltransferasesgroup1                                   | 3 | 3 |
| DNAtopoisomerase                                             | 3 | 3 |
| NterminusofRad21/Rec8likeprotein                             | 1 | 1 |
| Biotin-requiringenzyme                                       | 1 | 1 |

|                                                |   |   |
|------------------------------------------------|---|---|
| CENP-BN-terminalDNA-bindingdomain              | 1 | 1 |
| CTDkinasesubunitgammaCTK3                      | 1 | 1 |
| MidasinAAAliddomain                            | 1 | 1 |
| BP28CT(NUC211)domain                           | 1 | 1 |
| Hydroxyethylthiazolekinasefamily               | 1 | 1 |
| RibosomalL28proteinfamily                      | 3 | 3 |
| CLASPNterminal                                 | 1 | 1 |
| Domainofunknownfunction(DUF4210)               | 1 | 1 |
| PPRrepeat                                      | 5 | 5 |
| RibosomalproteinL11,RNAbindingdomain           | 1 | 1 |
| Squaleneepoxidase                              | 1 | 1 |
| Domainofunknownfunction(DUF3337)               | 1 | 1 |
| EF-handdomain                                  | 7 | 7 |
| IndigoidinesynthaseAlikeprotein                | 1 | 1 |
| KinasebindingproteinCGI-121                    | 1 | 1 |
| Rit1N-terminaldomain                           | 1 | 1 |
| Beta-lactamaseassociatedwingedhelixdomain      | 1 | 1 |
| Rpn9C-terminalhelix                            | 1 | 1 |
| SprT-likefamily                                | 3 | 3 |
| 1,3-beta-glucansynthasecomponent               | 1 | 1 |
| PASdomain                                      | 3 | 3 |
| Glucosyltransferase24                          | 1 | 1 |
| CoatmerWDassociatedregion                      | 1 | 1 |
| DNAreplicationcomplexGINSproteinSLD5C-terminus | 1 | 1 |
| Gelsolinrepeat                                 | 1 | 1 |
| Glycosyltransferasefamily20                    | 1 | 1 |
| C-terminusofhistoneH2A                         | 1 | 1 |
| SPXdomain                                      | 1 | 1 |
| Vacuolarprotein14C-terminalFig4pbinding        | 1 | 1 |
| MIF4Gdomain                                    | 1 | 1 |

|                                                        |    |    |
|--------------------------------------------------------|----|----|
| Exportin-5family                                       | 1  | 1  |
| Putativepeptidasefamily                                | 1  | 1  |
| HSF-typeDNA-binding                                    | 1  | 1  |
| PAP2superfamily                                        | 9  | 9  |
| RPAP1-like,C-terminal                                  | 1  | 1  |
| pre-mRNAprocessingfactor4(PRP4)like                    | 1  | 1  |
| Glycosylhydrolasefamily115                             | 1  | 1  |
| SHR-bindingdomainofvacuolar-sortingassociatedprotein13 | 1  | 1  |
| GC-richsequenceDNA-bindingfactor-likeprotein           | 1  | 1  |
| Ubiquitinelongatingfactorcore                          | 1  | 1  |
| ShugoshinN-terminalcoiled-coilregion                   | 1  | 1  |
| Zinc-ribbon                                            | 3  | 3  |
| Rasfamily                                              | 29 | 29 |
| ABCtransportertransmembraneregion2                     | 1  | 1  |
| LeucineRichrepeats(2copies)                            | 1  | 1  |
| UbiquitinfusiondegradationproteinUFD1                  | 1  | 1  |
| Guaninenucleotideexchange factorsynembryn              | 1  | 1  |
| NucleoporinNup120/160                                  | 1  | 1  |
| Histidyl-tRNAsynthetase                                | 1  | 1  |
| FYVEzincfinger                                         | 3  | 3  |
| SBDSproteinC-terminaldomain                            | 1  | 1  |
| Serinecarboxypeptidase                                 | 7  | 7  |
| MolybdenumCofactorSynthesisC                           | 1  | 1  |
| Skp1family,dimerisationdomain                          | 1  | 1  |
| Est1DNA/RNAbindingdomain                               | 1  | 1  |
| X-Prodipeptidyl-peptidaseC-terminalnon-catalyticdomain | 1  | 1  |
| MuniscinC-terminalmuhomologydomain                     | 1  | 1  |
| MitochondrialdegradasomeRNAhelicasesubunitCterminal    | 1  | 1  |
| Gryzun,putativetraffickingthroughGolgi                 | 1  | 1  |
| Glycosylhydrolasefamily81C-terminaldomain              | 1  | 1  |

|                                                              |    |    |
|--------------------------------------------------------------|----|----|
| Chromoshadowdomain                                           | 1  | 1  |
| HEATrepeats                                                  | 3  | 3  |
| Signalpeptidepeptidase                                       | 1  | 1  |
| Signalrecognitionparticle,alphasubunit,N-terminal            | 1  | 1  |
| DNApolymerasebetapalm                                        | 1  | 1  |
| RhamnogalacturonanlyaseB,N-terminal                          | 1  | 1  |
| Tetrahydrofolatedehydrogenase/cyclohydrolase,catalyticdomain | 1  | 1  |
| EF-1guaninenucleotideexchangedomain                          | 1  | 1  |
| SisterchromatidcohesionC-terminus                            | 1  | 1  |
| 2-oxoaciddehydrogenasesacyltransferase(catalyticdomain)      | 1  | 1  |
| HSCBC-terminaloligomerisationdomain                          | 1  | 1  |
| Tuberculosisnecrotizingtoxin                                 | 1  | 1  |
| AuxiliaryActivityfamily9(formerlyGH61)                       | 7  | 7  |
| PutativeSAM-dependentmethyltransferase                       | 1  | 1  |
| RibosomalproteinL7Ae/L30e/S12e/Gadd45family                  | 9  | 9  |
| CsbD-like                                                    | 1  | 1  |
| Aminotransferaseclass-V                                      | 7  | 7  |
| LEM3(ligand-effectmodulator3)family/CDC50family              | 1  | 1  |
| Carboxymuconolactonedecarboxylasefamily                      | 1  | 1  |
| Glycosylhydrolasesfamily17                                   | 5  | 5  |
| Aldo/ketoreductasefamily                                     | 31 | 30 |
| Maf1regulator                                                | 1  | 1  |
| Mpp10protein                                                 | 1  | 1  |
| TypeI3-dehydroquinase                                        | 1  | 1  |
| Peroxisomalmembraneprotein(Pex16)                            | 1  | 1  |
| Heterokaryonincompatibilityprotein(HET)                      | 13 | 13 |
| EpoxidehydrolaseNterminus                                    | 3  | 3  |
| Uncharacterisedconservedprotein                              | 1  | 1  |
| Pal1cellmorphologyprotein                                    | 1  | 1  |
| LMBR1-likemembraneprotein                                    | 3  | 3  |

|                                                          |    |    |
|----------------------------------------------------------|----|----|
| Prolinedehydrogenase                                     | 3  | 3  |
| Di-sulfidebridgenucleocytoplasmictransportdomain         | 1  | 1  |
| TFIIShelicalbundle-likedomain                            | 1  | 1  |
| Thioesterase-likesuperfamily                             | 7  | 7  |
| Predictedintegralmembranezinc-ribbonmetal-bindingprotein | 1  | 1  |
| GRIPdomain                                               | 1  | 1  |
| TCP-1/cpn60chaperoninfamily                              | 16 | 15 |
| EukaryotictranslationinitiationfactoreIF2A               | 1  | 1  |
| Proteinofunknownfunction(DUF1691)                        | 1  | 1  |
| N-acetyltransferaseBcomplex(NatB)noncatalyticsubunit     | 1  | 1  |
| Zinc-fingerdouble-strandedRNA-binding                    | 5  | 5  |
| Carboxylesterasefamily                                   | 7  | 7  |
| Alpha/betahydrolasefamily                                | 27 | 27 |
| Phytanoyl-CoAdioxygenase(PhyH)                           | 9  | 9  |
| Methyltransferasedomain                                  | 47 | 47 |
| Acetamidase/Formamidasefamily                            | 1  | 1  |
| GDA1/CD39(nucleosidephosphatase)family                   | 1  | 1  |
| Transmembraneaminoacidtransporterprotein                 | 21 | 23 |
| Adenosylmethioninedecarboxylase                          | 1  | 1  |
| NmrA-likefamily                                          | 35 | 37 |
| ReplicationForkProtectionComponentSwi3                   | 1  | 1  |
| PRELI-likefamily                                         | 3  | 3  |
| Bacterialtransferasehexapeptide(sixrepeats)              | 1  | 1  |
| Lowmolecularweightphosphotyrosineproteinphosphatase      | 1  | 1  |
| UcrQfamily                                               | 1  | 1  |
| Proteinofunknownfunction(DUF1761)                        | 1  | 1  |
| Initiationfactor2subunitfamily                           | 7  | 7  |
| Acetyltransferase(GNAT)family                            | 27 | 27 |
| DNArepairproteinendonucleaseSAE2/CtIPC-terminus          | 1  | 1  |
| Glycosylhydrolasecatalyticcore                           | 3  | 3  |



|                                                           |    |    |
|-----------------------------------------------------------|----|----|
| Lyticpolysaccharidemono-oxygenase,cellulose-degrading     | 1  | 1  |
| MeioticcellcortexC-terminalpleckstrinhomology             | 1  | 1  |
| Opy2protein                                               | 1  | 1  |
| Aldehydedehydrogenasefamily                               | 34 | 34 |
| HDdomain                                                  | 11 | 11 |
| Linalooldehydratase/isomerase                             | 1  | 0  |
| Tyrosinephosphatasefamily                                 | 5  | 5  |
| Eukaryoticmitochondrialregulatorprotein                   | 1  | 1  |
| Carbon-nitrogenhydrolase                                  | 7  | 7  |
| Lipase(class3)                                            | 11 | 11 |
| Enoyl-(Acylcarrierprotein)reductase                       | 52 | 53 |
| Sulfotransferasedomain                                    | 1  | 1  |
| Glycosylhydrolasesfamily11                                | 3  | 3  |
| N-Acetylglucosaminyltransferase-IV(GnT-IV)conservedregion | 1  | 1  |
| AcyclicterpeneutilisationfamilyproteinAtuA                | 3  | 3  |
| ProteinofunknownfunctionDUF84                             | 1  | 1  |
| NAD(P)H-binding                                           | 15 | 15 |
| PeptidaseS24-like                                         | 1  | 1  |
| Spo12family                                               | 1  | 1  |
| Mpv17/PMP22family                                         | 9  | 9  |
| DSS1/SEM1family                                           | 1  | 1  |
| Endonuclease/Exonuclease/phosphatasefamily                | 7  | 7  |
| GPR1/FUN34/yaaHfamily                                     | 11 | 11 |
| PXdomain                                                  | 5  | 5  |
| DJ-1/PfpIfamily                                           | 9  | 9  |
| LSMdomain                                                 | 17 | 17 |
| Pan3Pseudokinasedomain                                    | 1  | 1  |
| GATdomain                                                 | 1  | 1  |
| Fattyacidhydroxylasesuperfamily                           | 13 | 13 |
| ARP2/3complex20kDasubunit(ARPC4)                          | 1  | 1  |

|                                                          |    |    |
|----------------------------------------------------------|----|----|
| SerinecarboxypeptidaseS28                                | 1  | 1  |
| Peroxidase, family2                                      | 5  | 5  |
| ClassIIAldolaseandAdducinN-terminaldomain                | 5  | 5  |
| Autophagy-relatedprotein13                               | 1  | 1  |
| Cupindomain                                              | 11 | 11 |
| Nucleartransportfactor2(NTF2)domain                      | 1  | 1  |
| Putativeadipose-regulatoryprotein(Seipin)                | 1  | 1  |
| Phenazinebiosynthesis-likeprotein                        | 1  | 1  |
| IMP-specific5'-nucleotidase                              | 1  | 1  |
| MafB19-likedeaminase                                     | 3  | 3  |
| Permeasefamily                                           | 3  | 3  |
| AcylCoAbindingprotein                                    | 1  | 1  |
| UreF                                                     | 1  | 1  |
| Shikimatekinase                                          | 3  | 3  |
| Nitroreductasefamily                                     | 3  | 3  |
| HPPfamily                                                | 1  | 1  |
| Beta-lactamase                                           | 7  | 5  |
| Glycosyltransferasesugar-bindingregioncontainingDXDmotif | 5  | 5  |
| YqcI/YcgGfamily                                          | 1  | 1  |
| Cut12conserveddomain                                     | 1  | 1  |
| Dihydrodipicolinatesynthetasefamily                      | 11 | 11 |
| Pre-mRNAsplicingPrp18-interactingfactor                  | 1  | 1  |
| RibosomalproteinL21e                                     | 1  | 1  |
| Anp1                                                     | 5  | 5  |
| Zincfinger,C3HC4type(RINGfinger)                         | 5  | 5  |
| tRNAintronendonuclease,catalyticC-terminaldomain         | 3  | 3  |
| PAXNEBprotein                                            | 1  | 1  |
| RNAPolymeraseRpb8                                        | 1  | 1  |
| Proteinofunknownfunction(DUF775)                         | 1  | 1  |
| zinc-RINGfingerdomain                                    | 1  | 1  |

|                                                       |   |   |
|-------------------------------------------------------|---|---|
| Pre-mRNA-splicingfactorofREScomplex                   | 1 | 1 |
| Anaphase-promotingcomplexsubunit5                     | 1 | 1 |
| ComplexIntermediate-associatedprotein30(CIA30)        | 1 | 1 |
| Tim44-likedomain                                      | 1 | 1 |
| Phosphoenolpyruvatephosphomutase                      | 5 | 5 |
| RNA-bindingparticle68                                 | 1 | 1 |
| Hsp70protein                                          | 9 | 9 |
| Uncharacterisedprotein(DUF2415)                       | 1 | 1 |
| Coiled-coildomain-containingprotein124/Oxs1           | 1 | 1 |
| Transaldolase/Fructose-6-phosphatealdolase            | 3 | 3 |
| NFACTproteinRNAbindingdomain                          | 1 | 1 |
| RING-variantdomain                                    | 3 | 3 |
| tRNApseudouridinesynthase                             | 3 | 3 |
| RibosomalproteinS7e                                   | 1 | 1 |
| MitochondrialATPsynthasegsubunit                      | 1 | 1 |
| SecE/Sec61-gammasubunitsofproteintranslocationcomplex | 1 | 1 |
| Patatin-likephospholipase                             | 2 | 2 |
| T5orf172domain                                        | 1 | 1 |
| Arrestin(orS-antigen),N-terminaldomain                | 3 | 3 |
| POTfamily                                             | 5 | 5 |
| Double-strandedDNA-bindingdomain                      | 1 | 1 |
| Sas10/Utp3/C1Dfamily                                  | 3 | 3 |
| Pregnancy-associatedplasma protein-A                  | 1 | 1 |
| MycotoxinbiosynthesisproteinUstYa                     | 3 | 3 |
| UBXdomain                                             | 3 | 3 |
| MYNDfinger                                            | 3 | 3 |
| SURF1family                                           | 1 | 1 |
| haloaciddehalogenase-likehydrolase                    | 7 | 7 |
| Domainofunknownfunction(DUF4452)                      | 1 | 1 |
| Ham1family                                            | 1 | 1 |

|                                                         |   |   |
|---------------------------------------------------------|---|---|
| PeptidasefamilyC78                                      | 1 | 1 |
| Wingsapart-likeproteinregulationofheterochromatin       | 1 | 1 |
| Uracilphosphoribosyltransferase                         | 3 | 3 |
| TranscriptionelongationfactorElf1like                   | 1 | 1 |
| RibosomalS3Aefamily                                     | 1 | 1 |
| Actininteractingprotein3                                | 1 | 1 |
| Lysophospholipasecatalyticdomain                        | 5 | 5 |
| IKI3family                                              | 1 | 1 |
| Acyl-coenzymeA:6-aminopenicillanicacidacyl-transferase  | 1 | 1 |
| Proteinofunknownfunction(DUF3984)                       | 1 | 1 |
| Hptdomain                                               | 1 | 1 |
| Grap2andcyclin-D-interacting                            | 1 | 1 |
| AKAP72'5'RNAligase-likedomain                           | 1 | 1 |
| Rtf2RING-finger                                         | 1 | 1 |
| Probablemolybdopterinbindingdomain                      | 1 | 1 |
| NUBPLiron-transferP-loopNTPase                          | 3 | 3 |
| TranscriptionfactorS-II(TFIIS)                          | 3 | 3 |
| Folliculin-interactingproteinN-terminus                 | 1 | 1 |
| Sin3bindingregionofhistonedecetylasecomplexsubunitSAP30 | 1 | 1 |
| CaseinkinasesubstratephosphoproteinPP28                 | 1 | 1 |
| DNAprimasesmallsubunit                                  | 1 | 1 |
| tRNA(Guanine-1)-methyltransferase                       | 1 | 1 |
| MitochondrialbiogenesisAIM24                            | 1 | 1 |
| Uncharacterisedproteinfamily(UPF0160)                   | 1 | 1 |
| cAMP-regulatedphosphoprotein/endosulfineconservedregion | 1 | 1 |
| Glutamate-cysteineligase                                | 1 | 1 |
| Familyofunknownfunction(DUF5308)                        | 1 | 1 |
| ArgonautesiRNACHaperone(ARC)complexsubunitArb1          | 1 | 1 |
| Inositolpolyphosphatekinase                             | 3 | 3 |
| Proteolipidmembranepotentialmodulator                   | 3 | 3 |

|                                                          |    |    |
|----------------------------------------------------------|----|----|
| RibonucleaseIII domain                                   | 1  | 1  |
| RTA1 like protein                                        | 17 | 17 |
| LURP-one-related                                         | 1  | 1  |
| Dyp-type peroxidase family                               | 1  | 1  |
| GRAB domain                                              | 1  | 1  |
| CHD5-like protein                                        | 1  | 1  |
| Transferase family                                       | 1  | 1  |
| Protein trafficking PGA2                                 | 1  | 1  |
| Heat shock factor binding protein 1                      | 1  | 1  |
| RING-H2 zinc finger domain                               | 1  | 1  |
| HpcH/HpaI aldolase/citrate lyase family                  | 3  | 3  |
| Bacterial extracellular solute-binding protein           | 1  | 0  |
| Peptidyl-tRNA hydrolase PTH2                             | 1  | 1  |
| Sodium/hydrogen exchanger family                         | 7  | 7  |
| Pectinesterase                                           | 1  | 1  |
| Phosphatidylinositol-glycan biosynthesis class S protein | 1  | 1  |
| Pyridoxal-dependent decarboxylase conserved domain       | 11 | 11 |
| F-box domain                                             | 1  | 1  |
| Ribosome biogenesis protein Nop16                        | 1  | 1  |
| G protein-coupled glucose receptor regulating Gpa2       | 3  | 3  |
| Tannase and feruloyl esterase                            | 3  | 3  |
| CoA-transferase family III                               | 5  | 5  |
| 2-phospho-L-lactate transferase CofD                     | 1  | 1  |
| Ergosterol biosynthesis ERG4/ERG24 family                | 1  | 1  |
| Mannose-6-phosphate receptor                             | 1  | 1  |
| Acyltransferase family                                   | 3  | 3  |
| Pectate lyase                                            | 21 | 21 |
| Endoribonuclease L-PSP                                   | 13 | 13 |
| Glutathione peroxidase                                   | 1  | 1  |
| Peroxidase                                               | 9  | 9  |

|                                                               |    |    |
|---------------------------------------------------------------|----|----|
| PeptidasefamilyS58                                            | 1  | 1  |
| Pyoverdine/dityrosinebiosynthesisprotein                      | 3  | 3  |
| Peroxin-3                                                     | 1  | 1  |
| Autophagy-relatedprotein101                                   | 1  | 1  |
| Putativecyclase                                               | 1  | 1  |
| EutQ-likecupindomain                                          | 1  | 1  |
| L-rhamnosemutarotase                                          | 1  | 1  |
| Etoposide-inducedprotein2.4(EI24)                             | 3  | 3  |
| S1/P1Nuclease                                                 | 1  | 1  |
| Arginasefamily                                                | 3  | 3  |
| Aminotransferaseclass-III                                     | 11 | 11 |
| Calpainfamilycysteineprotease                                 | 3  | 3  |
| GlucosidaseIbetasubunit-likeprotein                           | 1  | 1  |
| NADH:flavinoxidoreductase/NADHoxidasefamily                   | 13 | 13 |
| RibonucleaseT2family                                          | 1  | 1  |
| Autophagy-relatedprotein27                                    | 1  | 1  |
| NADH-ubiquinoneoxidoreductaseB18subunit(NDUFB7)               | 1  | 1  |
| Carbohydratephosphorylase                                     | 1  | 1  |
| G-proteinalphasubunit                                         | 1  | 1  |
| FHADomain                                                     | 7  | 7  |
| Respiratory-chainNADHdehydrogenase,30Kdsubunit                | 1  | 1  |
| Phosphotyrosylphosphateactivator(PTPA)protein                 | 3  | 3  |
| GTPcyclohydrolaseII                                           | 1  | 1  |
| Proteinofunknownfunction(DUF3591)                             | 1  | 1  |
| SRF-typetranscriptionfactor(DNA-bindinganddimerisationdomain) | 1  | 1  |
| Isocitrate/isopropylmalatedehydrogenase                       | 9  | 9  |
| Phosphoglucoseisomerase                                       | 1  | 1  |
| MitochondrialribosomalsubunitS27                              | 1  | 1  |
| RibosomalproteinS24e                                          | 1  | 1  |
| Lysinemethyltransferase                                       | 9  | 9  |

|                                                             |    |    |
|-------------------------------------------------------------|----|----|
| Fungalproteinofunknownfunction(DUF1774)                     | 1  | 1  |
| Putativeamidoligaseenzyme                                   | 3  | 3  |
| PhosphomannoseisomerasetypeI                                | 3  | 3  |
| Trehaloseutilisation                                        | 1  | 1  |
| SGF29tudor-likedomain                                       | 1  | 1  |
| ADP-ribosylationfactorfamily                                | 7  | 7  |
| Amidohydrolase                                              | 25 | 25 |
| Glycosylhydrolasesfamily28                                  | 5  | 5  |
| GrpBprotein                                                 | 1  | 1  |
| Ppx/GppAphosphatasefamily                                   | 3  | 3  |
| HomocysteineS-methyltransferase                             | 1  | 1  |
| Histone-liketranscriptionfactor(CBF/NF-Y)andarchaealhistone | 7  | 7  |
| Utp8family                                                  | 1  | 1  |
| Chitinsynthaseexportchaperone                               | 1  | 1  |
| Glycosylhydrolasesfamily16                                  | 15 | 15 |
| Glycine-richdomain-containingprotein-like                   | 5  | 5  |
| Ribosomal silencing factor during starvation                | 1  | 1  |
| Putative tRNA binding domain                                | 1  | 1  |
| VITfamily                                                   | 1  | 1  |
| NADdependentepimerase/dehydratasefamily                     | 9  | 9  |
| Ringhydroxylatingalphasubunit(catalyticdomain)              | 1  | 1  |
| Isochorismatasefamily                                       | 1  | 1  |
| GDSL-likeLipase/Acylhydrolasefamily                         | 5  | 5  |
| Cytidylyltransferase-like                                   | 7  | 7  |
| EthanolamineutilisationproteinEutQ                          | 1  | 1  |
| Proteinofunknownfunction(DUF3445)                           | 2  | 2  |
| Phosphoesterasefamily                                       | 1  | 1  |
| Chromatinassemblyfactor1subunitA                            | 1  | 1  |
| ubiE/COQ5methyltransferasefamily                            | 3  | 3  |
| Dienelactonehydrolasefamily                                 | 3  | 3  |

|                                                     |    |    |
|-----------------------------------------------------|----|----|
| IGRproteinmotif                                     | 1  | 1  |
| tRNAN6-adenosinethreonylcarbamoyltransferase        | 3  | 3  |
| Enhancerofpolycomb-like                             | 1  | 1  |
| Polysaccharidedeacetylase                           | 3  | 3  |
| Phosphatidylinositol-specificphospholipaseC,Xdomain | 3  | 3  |
| Trypsin                                             | 1  | 1  |
| Arrestin_Nterminallike                              | 3  | 3  |
| Luciferase-likemonooxygenase                        | 1  | 1  |
| Acetyltransferase(GNAT)domain                       | 25 | 25 |
| RadicalSAMsuperfamily                               | 1  | 1  |
| Proteinofunknownfunction(DUF1681)                   | 1  | 1  |
| Senescence-associatedprotein                        | 1  | 1  |
| GlycinecleavageH-protein                            | 3  | 3  |
| Serinehydroxymethyltransferase                      | 3  | 3  |
| SH3domain                                           | 5  | 5  |
| Rtr1/RPAP2family                                    | 1  | 1  |
| RibosomalS17                                        | 1  | 1  |
| Fungalhydrophobin                                   | 1  | 1  |
| Mitochondrialribosomalproteinsubunit                | 3  | 3  |
| QueuinetRNA-ribosyltransferase                      | 3  | 3  |
| AminopeptidaseIzincmetalloprotease(M18)             | 3  | 3  |
| Histonedeacetylasedomain                            | 5  | 5  |
| Membranedipeptidase(PeptidasefamilyM19)             | 5  | 5  |
| 3-betahydroxysteroiddehydrogenase/isomerasefamily   | 3  | 3  |
| Beta-eliminatinglyase                               | 5  | 5  |
| Putativeheavy-metal-binding                         | 1  | 1  |
| ERproteinPkr1                                       | 1  | 1  |
| Proteinofunknownfunction(DUF3808)                   | 1  | 1  |
| Xyloseisomerase-likeTIMbarrel                       | 1  | 0  |
| Fungaltrichotheceneeffluxpump(TRI12)                | 1  | 1  |



|                                                            |    |    |
|------------------------------------------------------------|----|----|
| Proteinofunknownfunction(DUF1640)                          | 3  | 3  |
| GlutathioneS-transferase,C-terminaldomain                  | 5  | 5  |
| Polyketidecyclase/dehydraseandlipidtransport               | 3  | 3  |
| 60sAcidicribosomalprotein                                  | 1  | 1  |
| SPT2chromatinprotein                                       | 1  | 1  |
| EsterasePHBdepolymerase                                    | 3  | 3  |
| IntegralmembraneproteinEMC3/TMCO1-like                     | 1  | 1  |
| Microsomalsignalpeptidase25kDasubunit(SPC25)               | 1  | 1  |
| CFEMdomain                                                 | 11 | 9  |
| ATP11protein                                               | 1  | 1  |
| Partialalpha/beta-hydrolaselipaseregion                    | 1  | 1  |
| Mycolicacidcyclopropanesynthetase                          | 3  | 3  |
| MaoClikedomain                                             | 3  | 3  |
| TypeIphosphodiesterase/nucleotidepyrophosphatase           | 3  | 3  |
| Prion-inhibitionandpropagation                             | 1  | 1  |
| Glycosyltransferasefamily8                                 | 3  | 3  |
| Insulin-inducedprotein(INSIG)                              | 1  | 1  |
| Dephospho-CoAkinase                                        | 1  | 1  |
| D-mannosebindinglectin                                     | 1  | 1  |
| ERlumenproteinretainingreceptor                            | 3  | 3  |
| Tim17/Tim22/Tim23/Pmp24family                              | 7  | 7  |
| CSdomain                                                   | 3  | 3  |
| RibosomalproteinL3                                         | 11 | 11 |
| LUC7N_terminus                                             | 1  | 1  |
| Gpi16subunit,GPItransamidasecomponent                      | 1  | 1  |
| Proteinofunknownfunction(DUF2841)                          | 1  | 1  |
| Helix-loop-helixDNA-bindingdomain                          | 17 | 17 |
| NADH-ubiquinoneoxidoreductaseB12subunitfamily              | 1  | 1  |
| Chitinsynthesisregulation,resistancetoCongored             | 3  | 3  |
| PutativeS-adenosyl-L-methionine-dependentmethyltransferase | 1  | 1  |

|                                                             |   |   |
|-------------------------------------------------------------|---|---|
| Protein of unknown function (DUF726)                        | 3 | 3 |
| Vps51/Vps67                                                 | 3 | 3 |
| Antibiotic biosynthesis monooxygenase                       | 1 | 1 |
| A49-like RNA polymerase associated factor                   | 1 | 1 |
| Family of unknown function (DUF5572)                        | 1 | 1 |
| Alg9-like mannosyl transferase family                       | 5 | 5 |
| GDSL-like Lipase/Acylhydrolase                              | 9 | 7 |
| Tim10/DDP family zinc finger                                | 5 | 5 |
| Glycosyl hydrolase family 76                                | 5 | 5 |
| GPI transamidase subunit PIG-U                              | 1 | 1 |
| RNA polymerase I specific transcription initiation factor   | 3 | 3 |
| GWT1                                                        | 1 | 1 |
| Glycosyl transferase like family 2                          | 1 | 1 |
| Clr5 domain                                                 | 7 | 7 |
| Flavodoxin-like fold                                        | 1 | 1 |
| Origin recognition complex subunit 2                        | 1 | 1 |
| Phosphoribosyl transferase domain                           | 5 | 5 |
| Mitochondrial domain of unknown function (DUF1713)          | 1 | 1 |
| Histone acetyltransferase subunit 3                         | 1 | 1 |
| CybS, succinate dehydrogenase cytochrome B small subunit    | 1 | 1 |
| Importin-beta N-terminal domain                             | 3 | 3 |
| Maf-like protein                                            | 1 | 1 |
| Domain of unknown function (DUF3844)                        | 1 | 1 |
| Inositol phospholipid synthesis and fat-storage-inducing TM | 1 | 1 |
| LITAF-like zinc ribbon domain                               | 1 | 1 |
| Rhodanese-like domain                                       | 7 | 7 |
| Hemerythrin HHE cation binding domain                       | 3 | 3 |
| SKIP/SNW domain                                             | 1 | 1 |
| RNA polymerase Rpc34 subunit                                | 1 | 1 |
| emp24/gp25L/p24 family/GOLD                                 | 7 | 7 |

|                                                          |   |   |
|----------------------------------------------------------|---|---|
| Proteinofunknownfunction(DUF1275)                        | 1 | 1 |
| IronpermeaseFTR1family                                   | 5 | 5 |
| XLf-Cernunnos,XRcc4-likefactor,NHEJcomponent             | 1 | 1 |
| RibosomalproteinS21e                                     | 1 | 1 |
| Fic/DOCfamily                                            | 1 | 1 |
| PhoD-likephosphatase                                     | 1 | 1 |
| RibosomalproteinL14p/L23e                                | 3 | 3 |
| Familyofunknownfunction(DUF5427)                         | 1 | 1 |
| Sodium:solutesymporterfamily                             | 3 | 1 |
| Rrp15p                                                   | 1 | 1 |
| HMGL-like                                                | 1 | 1 |
| Peptidemethioninesulfoxidereductase                      | 1 | 1 |
| Inhibitorofapoptosis-promotingBax1                       | 3 | 3 |
| Glycolipidtransferprotein(GLTP)                          | 1 | 1 |
| Inositolmonophosphatasefamily                            | 5 | 5 |
| Yip1domain                                               | 3 | 3 |
| Glycosylhydrolasefamily45                                | 1 | 0 |
| Vps52/Sac2family                                         | 1 | 1 |
| Rab-GTPase-TBCdomain                                     | 9 | 9 |
| COMPASS(ComplexproteinsassociatedwithSet1p)componentshg1 | 1 | 1 |
| RanBP1domain                                             | 1 | 1 |
| RNApolymeraseI-specificinitiationfactor                  | 1 | 1 |
| ETCcomplexIsubunitconservedregion                        | 1 | 1 |
| Triose-phosphateTransporterfamily                        | 9 | 9 |
| Bin/amphiphysin/Rvsdomainforvesiculartrafficking         | 1 | 1 |
| Arv1-likefamily                                          | 1 | 1 |
| ChromosomesegregationproteinCsm1/Pcs1                    | 1 | 1 |
| PGAP1-likeprotein                                        | 1 | 1 |
| Choline/Carnitineo-acyltransferase                       | 3 | 3 |
| pfkBfamilycarbohydratekinase                             | 3 | 3 |

|                                                       |   |   |
|-------------------------------------------------------|---|---|
| Exo70exocystcomplexsubunit                            | 1 | 1 |
| SecretorypathwayproteinSec39                          | 1 | 1 |
| Proteinofunknownfunction(DUF2838)                     | 1 | 1 |
| CytochromecoxidasesubunitVII                          | 1 | 1 |
| Clathrinlightchain                                    | 1 | 1 |
| Serineaminopeptidase,S33                              | 5 | 5 |
| Proteinofunknownfunction(DUF3455)                     | 1 | 1 |
| MED6mediatorsubcomplexcomponent                       | 1 | 1 |
| RibosomalproteinL22p/L17e                             | 1 | 1 |
| Multiplemyelomatumor-associated                       | 1 | 1 |
| N2227-likeprotein                                     | 1 | 1 |
| Proteasomeassemblychaperone4                          | 1 | 1 |
| Eukaryoticintegralmembraneprotein(DUF1751)            | 3 | 3 |
| SPRYdomain                                            | 1 | 1 |
| Proteinofunknownfunction(DUF3684)                     | 1 | 1 |
| DNA-directedRNAPolymeraseIsubunitRPA34.5              | 1 | 1 |
| DNAPolymeraseIII,deltasubunit                         | 1 | 1 |
| RibosomalproteinL16p/L10e                             | 3 | 3 |
| Deoxyhypusinesynthase                                 | 1 | 1 |
| ArgJfamily                                            | 1 | 1 |
| BacteriallowtemperaturerequirementAprotein(LtrA)      | 5 | 5 |
| GrpE                                                  | 1 | 1 |
| Imidazoleglycerol-phosphatedehydratase                | 1 | 1 |
| Mob1/phoceinfamily                                    | 5 | 5 |
| ATPsynthasedelta(OSCP)subunit                         | 1 | 1 |
| Putativeundecaprenyldiphosphatesynthase               | 1 | 1 |
| InhibitorofgrowthproteinsN-terminalhistone-binding    | 3 | 3 |
| TranscriptioninitiationfactorTFIIDcomponentTAF4family | 1 | 1 |
| Alanineracemase,N-terminaldomain                      | 1 | 1 |
| ARSbindingprotein2                                    | 1 | 1 |

|                                                             |   |   |
|-------------------------------------------------------------|---|---|
| Root hair defective 3GTP-binding protein (RHD3)             | 1 | 1 |
| Ribonuclease HIII                                           | 1 | 1 |
| 2EXR family                                                 | 9 | 9 |
| Rad51                                                       | 3 | 3 |
| PSP1 C-terminal conserved region                            | 1 | 1 |
| SUR7/PalI family                                            | 5 | 5 |
| Ribosome recycling factor                                   | 1 | 1 |
| Up-regulated during septation                               | 1 | 1 |
| Gamma-glutamyl cyclotransferase, AIG2-like                  | 5 | 5 |
| Ribosomal protein L36                                       | 1 | 1 |
| PLAC8 family                                                | 3 | 3 |
| Transcription initiation factor IID, 31 kD subunit          | 1 | 1 |
| Uracil DNA glycosylase superfamily                          | 3 | 3 |
| Protein of unknown function (DUF3752)                       | 1 | 1 |
| TEA/ATTS domain                                             | 1 | 1 |
| RNA polymerase N/8 kD subunit                               | 1 | 1 |
| Protein of unknown function (DUF1479)                       | 1 | 1 |
| Eisosome component PIL1                                     | 1 | 1 |
| Cerato-platanin                                             | 5 | 5 |
| Ribosomal protein S18                                       | 1 | 1 |
| GPI biosynthesis protein family Pig-F                       | 1 | 1 |
| Cytidine and deoxycytidylated deaminase zinc-binding region | 5 | 5 |
| Thioredoxin-like [2Fe-2S] ferredoxin                        | 0 | 0 |
| Vacuolar segregation subunit 7                              | 1 | 1 |
| T-complex protein 11                                        | 3 | 3 |
| WKF domain                                                  | 1 | 1 |
| Interferon-related developmental regulator (IFRD)           | 1 | 1 |
| Afadin and alpha-actinin-binding                            | 1 | 1 |
| Integral membrane protein DUF92                             | 1 | 1 |
| Domain of unknown function (DUF4588)                        | 1 | 1 |

|                                                    |    |    |
|----------------------------------------------------|----|----|
| Glycosyltransferasefamily90                        | 1  | 1  |
| NADHubiquinoneoxidoreductase,20Kdsubunit           | 1  | 1  |
| Nup85Nucleoporin                                   | 1  | 1  |
| Anaphase-promotingcomplexsubunit1                  | 1  | 1  |
| PeptidasefamilyM48                                 | 1  | 1  |
| Cupinsuperfamily(DUF985)                           | 1  | 1  |
| TranscriptionalCoactivatorp15(PC4)                 | 1  | 1  |
| Ureidoglycolatelyase                               | 1  | 1  |
| Mitochondriallargesubunitribosomalprotein(Img2)    | 1  | 1  |
| RibosomalproteinL44                                | 1  | 1  |
| U3smallnucleolarRNA-associatedprotein6             | 1  | 1  |
| Cut8,nuclearproteasometetherprotein                | 1  | 1  |
| DSBA-likethioredoxindomain                         | 5  | 5  |
| O-methyltransferase                                | 9  | 9  |
| MediatorofRNAPolymeraseIItranscriptionsubunit1     | 1  | 1  |
| PredictedSAM-dependentRNAmethyltransferase         | 1  | 1  |
| TranscriptioninitiationfactorIID,18kDsubunit       | 1  | 1  |
| Flavinatorofsuccinatedehydrogenase                 | 1  | 1  |
| U1zincfinger                                       | 1  | 1  |
| CorA-likeMg <sup>2+</sup> transporterprotein       | 13 | 15 |
| 25SrRNA(adenine(2142)-N(1))-methyltransferase,Bmt2 | 1  | 1  |
| Fungalproteinofunknownfunction(DUF2015)            | 1  | 1  |
| Transportproteinparticle(TRAPP)component           | 5  | 5  |
| Proteinofunknownfunction(DUF2423)                  | 1  | 1  |
| Nuclearcondensingcomplexsubunits,C-termdomain      | 1  | 1  |
| MagnesiumtransporterNIPA                           | 7  | 7  |
| Translationallycontrolledtumourprotein             | 1  | 1  |
| Mis12protein                                       | 1  | 1  |
| Legume-likelectinfamily                            | 1  | 1  |
| Proteinofunknownfunction(DUF3767)                  | 1  | 1  |

|                                                     |   |   |
|-----------------------------------------------------|---|---|
| RibosomalproteinS11                                 | 3 | 3 |
| Iron-sulphurclusterbiosynthesis                     | 1 | 1 |
| Ctrcoppertransporterfamily                          | 3 | 3 |
| RNApseudouridylatesynthase                          | 1 | 1 |
| NifU-likeNterminaldomain                            | 1 | 1 |
| HORMAdomain                                         | 3 | 3 |
| Aldose1-epimerase                                   | 3 | 3 |
| Subunit11ofthegeneraltranscriptionfactorTFIIH       | 1 | 1 |
| PETassemblyofcytochromecoxidase,mitochondrial       | 1 | 1 |
| Vacuolar(H <sup>+</sup> )-ATPaseGsubunit            | 1 | 1 |
| Catenin-beta-like,Arm-motifcontainingnuclear        | 1 | 1 |
| Uncharacterisedproteinfamily(UPF0203)               | 1 | 1 |
| RNAPolymeraseIItranscriptionmediatorcomplexsubunit9 | 1 | 1 |
| Pyridoxamine5'-phosphateoxidase                     | 7 | 7 |
| TranscriptionmediatorcomplexsubunitMed12            | 1 | 1 |
| RNAPolymeraseIItranscriptionelongationfactor        | 1 | 1 |
| N-terminalC2inEEIG1andEHBP1proteins                 | 1 | 1 |
| Translationinitiationfactor1A/IF-1                  | 3 | 3 |
| ERCC4domain                                         | 3 | 3 |
| Ubiquitincooxyl-terminalhydrolase,family1           | 5 | 5 |
| Elongationcomplexprotein6                           | 1 | 1 |
| CBP4                                                | 1 | 1 |
| Adenosine-deaminase(editase)domain                  | 1 | 1 |
| RibosomalproteinL24e                                | 1 | 1 |
| Redoxin                                             | 3 | 3 |
| Fumble                                              | 1 | 1 |
| Malatesynthase                                      | 1 | 1 |
| CDP-alcoholphosphatidyltransferase                  | 5 | 5 |
| Copper/zincsuperoxidedismutase(SODC)                | 1 | 1 |
| PeptidaseC1-likefamily                              | 1 | 1 |

|                                                        |    |    |
|--------------------------------------------------------|----|----|
| O-methyltransferasedomain                              | 5  | 5  |
| Mid2likecellwallstresssensor                           | 1  | 1  |
| UDP-glucuronosylandUDP-glucosyltransferase             | 1  | 1  |
| ATPsynthase(C/AC39)subunit                             | 1  | 1  |
| Cnl2/NKP2familyprotein                                 | 1  | 1  |
| RibosomalproteinS15                                    | 1  | 1  |
| Uncharacterizedconservedprotein                        | 7  | 7  |
| Domainofunknownfunction(DUF1741)                       | 1  | 1  |
| RibosomalproteinL30p/L7e                               | 1  | 1  |
| 6-O-methylguanineDNAmethyltransferase,DNAbindingdomain | 1  | 1  |
| Fructosaminekinase                                     | 1  | 1  |
| Snf7                                                   | 11 | 11 |
| tRNA(Uracil-5-)-methyltransferase                      | 1  | 1  |
| Myosin-bindingstriatedmuscleassemblycentral            | 1  | 1  |
| TranscriptionalrepressorTCF25                          | 1  | 1  |
| Flavincontainingamineoxidoreductase                    | 7  | 7  |
| CytochromecoxidaseassemblyproteinCtaG/Cox11            | 1  | 1  |
| RNAPolymeraseRpb4                                      | 3  | 3  |
| GPI-GlcNActransferasecomplex,PIG-Hcomponent            | 1  | 1  |
| DNAPolymerasedelta,subunit4                            | 1  | 1  |
| PotentialQueosine,Q,salvageproteinfamily               | 1  | 1  |
| Majorintrinsicprotein                                  | 1  | 1  |
| Uncharacterizedproteinconservedinbacteria(DUF2263)     | 1  | 1  |
| cwf21domain                                            | 1  | 1  |
| PalH/RIM21                                             | 1  | 1  |
| Cwf15/Cwc15cellcyclecontrolprotein                     | 1  | 1  |
| Familyofunknownfunction(DUF5321)                       | 1  | 1  |
| PeptidasefamilyC50                                     | 1  | 1  |
| Proteinofunknownfunction(DUF3605)                      | 3  | 3  |
| SRP-independenttargetingprotein2/TMEM208               | 1  | 1  |



|                                                       |   |   |
|-------------------------------------------------------|---|---|
| RibosomalproteinS10p/S20e                             | 1 | 1 |
| MitochondrialribosomalproteinL31                      | 1 | 1 |
| Prephenatedehydratase                                 | 1 | 1 |
| Sulfotransferasefamily                                | 1 | 1 |
| Transcriptionalregulationofmitochondrialrecombination | 1 | 1 |
| PIG-X/PBN1                                            | 1 | 1 |
| GDP-mannose4,6dehydratase                             | 1 | 1 |
| Brixdomain                                            | 9 | 9 |
| RNasePsubunitPop3                                     | 1 | 1 |
| DehydrogenaseE1component                              | 3 | 3 |
| Neurochondrin                                         | 1 | 1 |
| RibosomalproteinS7p/S5e                               | 1 | 1 |
| Gtr1/RagAGproteinconservedregion                      | 3 | 3 |
| Hus1-likeprotein                                      | 1 | 1 |
| eIF-6family                                           | 1 | 1 |
| Necrosisinducingprotein(NPP1)                         | 1 | 1 |
| Growth-Arrest-SpecificProtein2Domain                  | 1 | 1 |
| 50Sribosome-bindingGTPase                             | 5 | 5 |
| Lowtemperatureviabilityprotein                        | 1 | 1 |
| SAC3/GANPfamily                                       | 1 | 1 |
| ERG2andSigma1receptorlikeprotein                      | 1 | 1 |
| Nuclearporecomplexcomponent                           | 1 | 1 |
| GolgiERtrafficprotein4                                | 1 | 1 |
| Uncharacterisedproteinfamily(UPF0220)                 | 1 | 1 |
| GDP/GTPexchangefactorSec2p                            | 1 | 1 |
| Eukaryoticporin                                       | 1 | 1 |
| Smallsubunitofserinepalmitoyltransferase-like         | 1 | 1 |
| RAI1likePD-(D/E)XKnuclease                            | 1 | 1 |
| CytochromecoxidasesubunitVa                           | 1 | 1 |
| GNS1/SUR4family                                       | 3 | 3 |

|                                                       |   |   |
|-------------------------------------------------------|---|---|
| Cgr1family                                            | 1 | 1 |
| Questinoxidase-like                                   | 1 | 1 |
| Nucleosomeassemblyprotein(NAP)                        | 3 | 3 |
| LCCLdomain                                            | 1 | 1 |
| Phospholipase/Carboxylesterase                        | 3 | 3 |
| Glycolipid2-alpha-mannosyltransferase                 | 3 | 3 |
| NuclearproteinEs2                                     | 1 | 1 |
| Clathrinadaptorcomplexsmallchain                      | 5 | 5 |
| DomainofKin17curvedDNA-bindingprotein                 | 1 | 1 |
| Saf4/Yju2protein                                      | 3 | 3 |
| rRNAbiogenesisproteinRRP36                            | 1 | 1 |
| RibosomalproteinS9/S16                                | 3 | 3 |
| VariantSH3domain                                      | 1 | 1 |
| Pyridoxamine5'-phosphateoxidaselike                   | 1 | 1 |
| Extracellularmutantprotein11                          | 1 | 1 |
| Large-conductancemechanosensitivechannel,MscL         | 1 | 1 |
| Leucine-richrepeat                                    | 1 | 1 |
| TatDrelatedDNase                                      | 5 | 5 |
| Non-classicalexportprotein1                           | 1 | 1 |
| Spc24subunitofNdc80                                   | 1 | 1 |
| Ferrochelatase                                        | 1 | 1 |
| Pathogeneffector putativenecrosis-inducingfactor      | 1 | 1 |
| Nucleotide-sugartransporter                           | 3 | 3 |
| Lateendosomal/lysosomaladaptorandMAPKandMTORactivator | 1 | 1 |
| MED7protein                                           | 1 | 1 |
| L-lysine6-monooxygenase(NADPH-requiring)              | 1 | 1 |
| RibosomalproteinS8                                    | 7 | 7 |
| Cornichonprotein                                      | 1 | 1 |
| NADPH-dependentFMNreductase                           | 3 | 3 |
| FKBP-typepeptidyl-prolylcis-transisomerase            | 1 | 1 |

|                                                           |   |   |
|-----------------------------------------------------------|---|---|
| Eukaryotic cytochrome b561                                | 1 | 1 |
| Protein of unknown function (DUF2012)                     | 1 | 1 |
| Cys/Met metabolism PLP-dependent enzyme                   | 5 | 7 |
| Membrane-associating domain                               | 7 | 7 |
| Citrate synthase, C-terminal domain                       | 3 | 3 |
| Domain of unknown function (DUF3425)                      | 5 | 5 |
| Apc15p protein                                            | 1 | 1 |
| Bacteriorhodopsin-like protein                            | 1 | 1 |
| Protein of unknown function (DUF1168)                     | 1 | 1 |
| Calcipressin                                              | 1 | 1 |
| Neugrin                                                   | 1 | 1 |
| Met-10+like-protein                                       | 3 | 3 |
| Origin recognition complex subunit 6 (ORC6)               | 1 | 1 |
| RNAse PRpr2/Rpp21/SNM1 subunit domain                     | 1 | 1 |
| tRNA-splicing endonuclease subunit sen54N-term            | 1 | 1 |
| Ribosomal protein L31e                                    | 1 | 1 |
| RibDC-terminal domain                                     | 1 | 1 |
| Regulator of volume decrease after cellular swelling      | 1 | 1 |
| NOT2/NOT3/NOT5 family                                     | 1 | 1 |
| CUE domain                                                | 5 | 5 |
| Regulator of Vps4 activity in the MVB pathway             | 1 | 1 |
| COPI associated protein                                   | 1 | 1 |
| IBR domain, a half RING-finger domain                     | 3 | 3 |
| Lactonase, 7-bladed beta-propeller                        | 5 | 5 |
| Cysteine-rich TM module stress tolerance                  | 1 | 1 |
| Phytase                                                   | 1 | 1 |
| ChrRCupin-like domain                                     | 1 | 1 |
| Short coiled-coil protein                                 | 1 | 1 |
| Trafficking protein particle complex subunit 10, TRAPPC10 | 1 | 1 |
| Mechanosensitive ion channel                              | 1 | 1 |

|                                                       |   |   |
|-------------------------------------------------------|---|---|
| SNOglutamineamidotransferasefamily                    | 1 | 1 |
| Domainofunknownfunction(DUF2828)                      | 1 | 1 |
| Chromo(CHRromatinOrganisationMOfifier)domain          | 1 | 1 |
| HypotheticalproteinFLILHELTA                          | 1 | 1 |
| Amino-transferaseclassIV                              | 5 | 5 |
| SnareregionanchoredinthevesiclemembraneC-terminus     | 3 | 3 |
| RibosomalRNAadeninedimethylase                        | 3 | 3 |
| Putativezincfingermotif,C2HC5-type                    | 1 | 1 |
| Nop53(60Sribosomalbiogenesis)                         | 1 | 1 |
| Ribose5-phosphateisomeraseA(phosphoriboisomeraseA)    | 1 | 1 |
| InositolphosphorylceramidesynthasesubunitKei1         | 1 | 1 |
| CatalyticLigBsubunitofaromaticring-openingdioxygenase | 3 | 3 |
| Mitochondrialdistributionandmorphologyprotein10       | 1 | 1 |
| tRNAsynthetasesclassI(C)catalyticdomain               | 1 | 1 |
| RNAPolymeraseI-associatedfactorPAF67                  | 1 | 1 |
| HistonemethylationproteinDOT1                         | 1 | 1 |
| Autophagyprotein16(ATG16)                             | 1 | 1 |
| Microtubuleassociatedprotein(MAP65/ASE1family)        | 1 | 1 |
| TypeII CAAXprenylendopeptidaseRce1-like               | 1 | 1 |
| Maintenanceofmitochondrialmorphologyprotein1          | 3 | 3 |
| Domainofunknownfunction(DUF1772)                      | 3 | 3 |
| Microsomal signalpeptidase12kDasubunit(SPC12)         | 1 | 1 |
| MBOAT,membrane-boundO-acyltransferasefamily           | 3 | 3 |
| Guanylatekinase                                       | 1 | 1 |
| PeptidasefamilyS41                                    | 1 | 1 |
| Promethin                                             | 1 | 1 |
| Glycosyltransferasefamily21                           | 1 | 1 |
| Retinoicacidinduced16-likeprotein                     | 1 | 1 |
| Dehydratasefamily                                     | 3 | 3 |
| Thioesterasedomain                                    | 1 | 1 |

|                                                      |   |   |
|------------------------------------------------------|---|---|
| Damage-controlphosphataseARMT1-likedomain            | 1 | 1 |
| Glycosylhydrolasesfamily32N-terminaldomain           | 3 | 3 |
| Peptidyl-tRNAhydrolase                               | 3 | 3 |
| Chalconeisomeraselike                                | 1 | 1 |
| RibosomalproteinL13                                  | 3 | 3 |
| PLD-likedomain                                       | 3 | 3 |
| MembraneboundO-acyltransferasefamily                 | 1 | 1 |
| SAPdomain                                            | 1 | 1 |
| Hamartinprotein                                      | 1 | 1 |
| CHCHdomain                                           | 1 | 1 |
| PHD-finger                                           | 5 | 5 |
| SCO1/SenC                                            | 1 | 1 |
| Complex1_LYR-like                                    | 5 | 5 |
| Spermine/spermidinesynthasedomain                    | 1 | 1 |
| Primasezincfinger                                    | 1 | 1 |
| DASHcomplexsubunitDuo1                               | 1 | 1 |
| ESSSsubunitofNADH:ubiquinoneoxidoreductase(complexI) | 1 | 1 |
| Alteredinheritanceofmitochondriaprotein21            | 1 | 1 |
| UncharacterizedconservedproteinCG6151-P              | 1 | 1 |
| SelRdomain                                           | 1 | 1 |
| ARID/BRIGHTDNAbindingdomain                          | 1 | 1 |
| DiaphanousGTPase-bindingDomain                       | 1 | 1 |
| Platelet-activatingfactoracetylhydrolase,isoformII   | 1 | 1 |
| Uncharacterizedconservedprotein(DUF2183)             | 1 | 1 |
| cAMPphosphodiesterasesclass-II                       | 1 | 1 |
| Flavinreductaselikedomain                            | 1 | 1 |
| Sideroflexins                                        | 1 | 1 |
| Domainofunknownfunction(DUF4045)                     | 1 | 1 |
| SMP-30/Gluconolactonase/LRE-likeregion               | 3 | 3 |
| Whi5like                                             | 3 | 3 |

|                                                          |   |   |
|----------------------------------------------------------|---|---|
| rRNAprocessing/ribosomebiogenesis                        | 1 | 1 |
| ER-boundoxygenasempaB/B'/Rubberoxygenase,catalyticdomain | 1 | 1 |
| TranscriptionfactorsubunitMed10ofMediatorcomplex         | 1 | 1 |
| RNAPolymeraseRpb6                                        | 1 | 1 |
| NRDE-2,necessaryforRNAinterference                       | 1 | 1 |
| Urb2/Npa2family                                          | 1 | 1 |
| Domainofunknownfunction(DUF543)                          | 1 | 1 |
| Triosephosphateisomerase                                 | 1 | 1 |
| MitochondrialribosomalproteinL51/S25/CI-B8domain         | 3 | 3 |
| CaseinkinaseIIregulatorysubunit                          | 3 | 3 |
| RIC1                                                     | 1 | 1 |
| VMA21-likedomain                                         | 1 | 1 |
| Opticatrophy3protein(OPA3)                               | 1 | 1 |
| Shwachman-Bodian-Diamondsyndrome(SBDS)protein            | 1 | 1 |
| Dynamitin                                                | 1 | 1 |
| RibosomalproteinS28e                                     | 1 | 1 |
| Domainofunknownfunction(DUF4748)                         | 1 | 1 |
| TUGubiquitin-likedomain                                  | 1 | 1 |
| Possiblelysinedecarboxylase                              | 1 | 1 |
| F-actincappingprotein,betasubunit                        | 1 | 1 |
| VacuoleeffluxerAtg22like                                 | 3 | 3 |
| Proteinofunknownfunction(DUF3602)                        | 7 | 7 |
| PreproteintranslocasesubunitSec66                        | 1 | 1 |
| Regionofunknownfunction(DUF2417)                         | 1 | 1 |
| HMG(highmobilitygroup)box                                | 3 | 3 |
| Magobinding                                              | 1 | 1 |
| Per1-likefamily                                          | 1 | 1 |
| RibosomalprokaryoticL21protein                           | 1 | 1 |
| RibosomalproteinS8e                                      | 3 | 3 |
| RWDdomain                                                | 1 | 1 |

|                                                         |   |   |
|---------------------------------------------------------|---|---|
| Uncharacterizedalpha/betahydrolasedomain(DUF2235)       | 3 | 3 |
| vonWillebrandfactortypeAdomain                          | 1 | 1 |
| Nbl1/BorealinNterminal                                  | 1 | 1 |
| RNApolymeraseIItranscriptionfactorSIII(Elongin)subunitA | 1 | 1 |
| Fungaldomainofunknownfunction(DUF1750)                  | 1 | 1 |
| Cleftlipandpalatetransmembraneprotein1(CLPTM1)          | 1 | 1 |
| Myosin-likecoiled-coilprotein                           | 1 | 1 |
| Domainofunknownfunction(DUF1993)                        | 5 | 5 |
| Haemolysin-IIIrelated                                   | 1 | 1 |
| Fms-interactingprotein/Thoc5                            | 1 | 1 |
| Glycosyltransferasefamilygroup2                         | 7 | 7 |
| dUTPase                                                 | 1 | 1 |
| Mitochondrialcalciumuniporter                           | 1 | 1 |
| Cytochromec/c1hemelyase                                 | 1 | 1 |
| CLN3protein                                             | 1 | 1 |
| Nucleotide-diphospho-sugartransferase                   | 1 | 1 |
| Inorganicpyrophosphatase                                | 1 | 1 |
| Phosphatetransporterfamily                              | 3 | 3 |
| Familyofunknownfunction(DUF6454)                        | 1 | 1 |
| Murligasemiddledomain                                   | 1 | 1 |
| ICE2                                                    | 1 | 1 |
| MSP(Majorspermprotein)domain                            | 1 | 1 |
| Proteinofunknownfunction(DUF2408)                       | 1 | 1 |
| YCII-relateddomain                                      | 1 | 1 |
| 3-demethylubiquinone-93-methyltransferase               | 1 | 1 |
| MitochondrialribosomalproteinsubunitL20                 | 1 | 1 |
| Sec1family                                              | 3 | 3 |
| CCCH-typezincfinger                                     | 1 | 1 |
| Translinfamily                                          | 3 | 3 |
| Gar1/Naf1RNAbindingregion                               | 1 | 1 |

|                                                        |   |   |
|--------------------------------------------------------|---|---|
| GINSclexprotein                                        | 1 | 1 |
| Rieske[2Fe-2S]domain                                   | 0 | 0 |
| R3H-associatedN-terminaldomain                         | 1 | 1 |
| ATPsynthasubunitK                                      | 1 | 1 |
| Mitochondrial18KDaprotein(MTP18)                       | 1 | 1 |
| Permeasefor cytosine/purines,uracil,thiamine,allantoin | 5 | 5 |
| Glutamineamidotransferasedomain                        | 1 | 1 |
| ALG3protein                                            | 1 | 1 |
| She9/Mdm33family                                       | 1 | 1 |
| RibosomalproteinS12/S23                                | 3 | 3 |
| TopoisomeraseII-associatedproteinPAT1                  | 1 | 1 |
| RPC5protein                                            | 1 | 1 |
| Endomembraneprotein70                                  | 1 | 1 |
| Vitamin-D-receptorinteractingMediatorsunit4            | 1 | 1 |
| U-boxdomain                                            | 1 | 1 |
| Dihydroorotatedehydrogenase                            | 1 | 1 |
| Thioesterasesuperfamily                                | 5 | 5 |
| Diacylglycerolkinasecatalyticdomain                    | 3 | 3 |
| TIM21                                                  | 1 | 1 |
| FRG1-likedomain                                        | 1 | 1 |
| Iron-sulfurclusterassemblyprotein                      | 1 | 1 |
| ElongatorsubunitIki1                                   | 1 | 1 |
| Ubiquitin-likeautophagyproteinApg12                    | 1 | 1 |
| Ketopantoatehydroxymethyltransferase                   | 1 | 1 |
| FtsJ-likemethyltransferase                             | 1 | 1 |
| Flavoprotein                                           | 5 | 5 |
| Poly(ADP-ribose)glycohydrolase(PARG)                   | 1 | 1 |
| Domainofunknownfunction(DUF4078)                       | 1 | 1 |
| Peroxisomalbiogenesisfactor11(PEX11)                   | 1 | 1 |
| Celldifferentiationfamily,Rcd1-like                    | 1 | 1 |



|                                                         |   |   |
|---------------------------------------------------------|---|---|
| Pex14N-terminaldomain                                   | 1 | 1 |
| HEC/Ndc80pfamily                                        | 1 | 1 |
| BindingdomainofDNArepairproteinErcc1(rad10/Swi10)       | 1 | 1 |
| Iron-containingalcoholdehydrogenase                     | 3 | 3 |
| Asxhomologydomain                                       | 1 | 1 |
| Proteinofunknownfunction(DUF3405)                       | 5 | 5 |
| Pex19proteinfamily                                      | 1 | 1 |
| Uncharacterizedproteinconservedinbacteria(DUF2264)      | 3 | 3 |
| Plus-3domain                                            | 1 | 1 |
| TranscriptionalregulatorofRNAPolIII,SAGA,subunit        | 1 | 1 |
| Breastcarcinomaamplifiedsequence2(BCAS2)                | 1 | 1 |
| Hyaluronan/mRNAbindingfamily                            | 1 | 1 |
| Isocitratelasefamily                                    | 3 | 3 |
| Yippeezinc-binding/DNA-binding/Mis18,centromereassembly | 3 | 3 |
| DNLzincfinger                                           | 1 | 1 |
| Anion-transportingATPase                                | 1 | 1 |
| HIUase/Transthyretinfamily                              | 1 | 1 |
| RING-typezinc-finger                                    | 1 | 1 |
| Glycoside-hydrolasefamilyGH114                          | 5 | 5 |
| MitochondrialexportproteinSom1                          | 1 | 1 |
| OST3/OST6family,transporterfamily                       | 1 | 1 |
| DNA mismatch repair protein HSM3, Nterminal domain      | 1 | 1 |
| DNA-directedRNAPolymeraseIIIsubunitRpc31                | 1 | 1 |
| Fip1motif                                               | 1 | 1 |
| Alkalinephosphatase                                     | 1 | 1 |
| Proteinofunknownfunction(DUF498/DUF598)                 | 1 | 1 |
| RibosomalproteinL34e                                    | 1 | 1 |
| RibosomalproteinL32                                     | 1 | 1 |
| AAR2protein                                             | 1 | 1 |
| EAP30/Vps36family                                       | 1 | 1 |

|                                                       |    |    |
|-------------------------------------------------------|----|----|
| MitochondrialimportreceptorsubunitTom22               | 1  | 1  |
| YEATSfamily                                           | 3  | 3  |
| Phosducin                                             | 3  | 3  |
| AminotransferaseclassIandII                           | 19 | 17 |
| CytochromeC1family                                    | 1  | 1  |
| GlcNAc-PIde-N-acetylase                               | 1  | 1  |
| Ceramidase                                            | 1  | 1  |
| Squalene/phytoenesynthase                             | 3  | 3  |
| Mannosyltransferase(PIG-M)                            | 1  | 1  |
| Dyneinlightintermediatechain(DLIC)                    | 1  | 1  |
| Proteinofunknownfunction,DUF255                       | 1  | 1  |
| Proteintyrosineandserine/threoninekinase              | 1  | 1  |
| Somethingaboutsilencing,SAS,complexsubunit4           | 1  | 1  |
| CytochromeCoxidasecopperchaperone(COX17)              | 1  | 1  |
| OligosaccharyltransferasesubunitRibophorinII          | 1  | 1  |
| Hypoxiainducedproteinconservedregion                  | 1  | 1  |
| Proteinofunknownfunction(DUF3237)                     | 1  | 1  |
| Rpp20subunitofnuclearRNaseMRPandP                     | 1  | 1  |
| Serinehydrolase(FSH1)                                 | 3  | 3  |
| Spc19                                                 | 1  | 1  |
| Dynactinsubunitp22                                    | 1  | 1  |
| RibosomalproteinS16                                   | 1  | 1  |
| PutativeRNAmethyltransferase                          | 1  | 1  |
| YeastcorticalproteinKAR9                              | 1  | 1  |
| SAICARsynthetase                                      | 1  | 1  |
| TransportproteinTrs120orTRAPPC9,TRAPPIIcomplexsubunit | 1  | 1  |
| Dopa4,5-dioxygenasefamily                             | 1  | 1  |
| SURF4family                                           | 1  | 1  |
| SWIMzincfinger                                        | 1  | 1  |
| Nuclearporecomplexassembly                            | 1  | 1  |

|                                                                   |   |   |
|-------------------------------------------------------------------|---|---|
| Polyprenylsynthetase                                              | 5 | 5 |
| Alaninedehydrogenase/PNT,N-terminaldomain                         | 1 | 1 |
| Fringe-like                                                       | 1 | 1 |
| AmmoniumTransporterFamily                                         | 3 | 3 |
| CRT10                                                             | 1 | 1 |
| ARP2/3complexARPC3(21kDa)subunit                                  | 1 | 1 |
| 7transmembranereceptor(Secretinfamily)                            | 1 | 1 |
| LicDfamily                                                        | 1 | 1 |
| 3-oxo-5-alpha-steroid4-dehydrogenase                              | 3 | 1 |
| MINDYdeubiquitinase                                               | 1 | 0 |
| RibosomalproteinS19                                               | 1 | 1 |
| TranscriptioninitiationfactorTFIID23-30kDasubunit                 | 1 | 1 |
| Dihydroneopterinaldolase                                          | 1 | 1 |
| OligosaccharidebiosynthesisproteinAlg14like                       | 1 | 1 |
| UTP--glucose-1-phosphateuridylyltransferase                       | 1 | 1 |
| XPAproteinC-terminus                                              | 1 | 1 |
| Phosphatetransport(Pho88)                                         | 1 | 1 |
| Ser-Thr-richglycosyl-phosphatidyl-inositol-anchoredmembranefamily | 3 | 3 |
| Polycystincationchannel                                           | 1 | 1 |
| Macrodomain                                                       | 1 | 1 |
| RibonucleaseP/MRP,subunitp29                                      | 1 | 1 |
| Pantoate-beta-alanineligase                                       | 1 | 1 |
| Leo1-likeprotein                                                  | 1 | 1 |
| Alcoholacetyltransferase                                          | 3 | 3 |
| PutativeFMN-bindingdomain                                         | 1 | 1 |
| XAP5,circadianclockregulator                                      | 1 | 1 |
| Alternariaalternataallergen1                                      | 1 | 1 |
| KinetochorescomplexSim4subunitFta1                                | 1 | 1 |
| Conidiationprotein6                                               | 1 | 1 |
| Fungalchitosanaseofglycosylhydrolasegroup75                       | 1 | 1 |

|                                                              |    |    |
|--------------------------------------------------------------|----|----|
| Vacuolarproteinorting55                                      | 1  | 1  |
| Exonuclease                                                  | 11 | 11 |
| Metal-independentalpha-mannosidase(GH125)                    | 1  | 1  |
| DNApolymerasesubunitCdc27                                    | 1  | 1  |
| Thocomplexsubunit7                                           | 1  | 1  |
| Nnf1                                                         | 1  | 1  |
| PutativeSin3bindingprotein                                   | 1  | 1  |
| Proteinofunknownfunction(DUF1295)                            | 1  | 1  |
| Domainofunknownfunction(DUF4149)                             | 1  | 1  |
| Dolicholphosphate-mannosebiosynthesisregulatoryprotein(DPM2) | 1  | 1  |
| Dihydrouridinesynthase(Dus)                                  | 1  | 1  |
| Leucinerichrepeat                                            | 3  | 3  |
| Rdxfamily                                                    | 1  | 1  |
| GGLdomain                                                    | 1  | 1  |
| Zinc-fingerofmitochondrialsplicingssuppressor51              | 1  | 1  |
| UBA-likedomain                                               | 1  | 1  |
| Coiled-coildomain-containingprotein55(DUF2040)               | 1  | 1  |
| HistoneacetyltransferaseHAT1N-terminus                       | 1  | 1  |
| GDPdissociationinhibitor                                     | 3  | 3  |
| Mitochondrial39-SribosomalproteinL47(MRP-L47)                | 1  | 1  |
| TranslocationproteinSec62                                    | 1  | 1  |
| Peptidaseofplantsandbacteria                                 | 1  | 1  |
| RibophorinI                                                  | 3  | 3  |
| Yqey-likeprotein                                             | 1  | 1  |
| Krr1KH1domain                                                | 1  | 1  |
| Chaperonin10Ksubunit                                         | 1  | 1  |
| ComponentofIISlongevitypathwaySMK-1                          | 1  | 1  |
| Glycosyltransferasefamily2                                   | 9  | 11 |
| RibosomalproteinL23                                          | 3  | 3  |
| 39SribosomalproteinL53/MRP-L53                               | 1  | 1  |

|                                                  |   |   |
|--------------------------------------------------|---|---|
| RNApolIIaccessoryfactor,Cdc73family,C-terminal   | 1 | 1 |
| Bystin                                           | 1 | 1 |
| Sec20                                            | 1 | 1 |
| PeptidasefamilyM3                                | 3 | 3 |
| Proteinofunknownfunction(DUF1304)                | 1 | 1 |
| Ribosomalsubunit39S                              | 1 | 1 |
| DAHPsynthetaseIfamily                            | 1 | 1 |
| MAGEfamily                                       | 1 | 1 |
| Splicingfactor3Bsubunit10(SF3b10)                | 1 | 1 |
| ATP12chaperoneprotein                            | 1 | 1 |
| Inheritanceofperoxisomesprotein1                 | 1 | 1 |
| OTU-likecysteineprotease                         | 1 | 1 |
| Ribosome-assemblyprotein3                        | 1 | 1 |
| Gaa1-like,GPItransamidasecomponent               | 1 | 1 |
| DASHcomplexsubunitDam1                           | 1 | 1 |
| Ran-interactingMog1protein                       | 1 | 1 |
| CSN8/PSMD8/EIF3Kfamily                           | 3 | 3 |
| Golgitransportcomplexsubunit5                    | 1 | 1 |
| Proteinofunknownfunction(DUF2434)                | 1 | 1 |
| FAR-17a/AIG1-likeprotein                         | 1 | 1 |
| PeptidasefamilyC54                               | 1 | 1 |
| RibosomalproteinS17                              | 1 | 1 |
| Signalrecognitionparticle14kDprotein             | 1 | 1 |
| Irononlyhydrogenaselargesubunit,C-terminaldomain | 1 | 1 |
| CHRDdomain                                       | 1 | 1 |
| COQ9                                             | 1 | 1 |
| THUMPdomain                                      | 1 | 1 |
| Erv1/Alrfamily                                   | 1 | 1 |
| SUZdomain                                        | 1 | 1 |
| Uroporphyrinogen-III synthaseHemD                | 1 | 1 |

|                                                      |    |    |
|------------------------------------------------------|----|----|
| Domainofunknownfunction(DUF1917)                     | 1  | 1  |
| UncharacterisedACR,YggUfamilyCOG1872                 | 1  | 1  |
| HADdomainfamily1inSwissArmyKnifeRNArepairproteins    | 1  | 1  |
| Inosine-uridinepreferringnucleosidehydrolase         | 1  | 1  |
| Proteinofunknownfunction(DUF2985)                    | 3  | 3  |
| Proteinofunknownfunction(DUF3429)                    | 1  | 1  |
| SIT4phosphatase-associatedprotein                    | 1  | 1  |
| Rhomboidfamily                                       | 1  | 1  |
| Eukaryoticproteinofunknownfunction(DUF829)           | 3  | 1  |
| Ubiquitin-2likeRad60SUMO-like                        | 3  | 3  |
| Proteinofunknownfunction(DUF3292)                    | 1  | 1  |
| Med18protein                                         | 1  | 1  |
| Uncharacterizedconservedprotein(DUF2293)             | 1  | 1  |
| NUC173domain                                         | 1  | 1  |
| Calcineurin-likephosphoesterasesuperfamilydomain     | 1  | 1  |
| DASHcomplexsubunitDad2                               | 1  | 1  |
| Cytochromeoxidasecomplexassemblyprotein1             | 1  | 1  |
| ChromosomesegregationproteinSpc25                    | 1  | 1  |
| Mitotic-spindleorganizinggamma-tubulinringassociated | 1  | 1  |
| Plasma-membranecholinetransporter                    | 3  | 3  |
| Sec61betafamily                                      | 1  | 1  |
| Ribosomalproteins50S-L18Ae/60S-L20/60S-L18A          | 1  | 1  |
| BRCA1CTerminus(BRCT)domain                           | 1  | 1  |
| Rap1-interactingfactor1Nterminal                     | 1  | 1  |
| Class-IIAHPsynthetasefamily                          | 1  | 1  |
| HYPKUBAdomain                                        | 1  | 1  |
| RNasePsubunitp30                                     | 1  | 1  |
| UncharacterisedACR,YagEfamilCOG1723                  | 3  | 3  |
| ATPsynthase                                          | 25 | 25 |
| galactosyltransferaseGMA12/MNN10family               | 1  | 1  |

|                                            |   |   |
|--------------------------------------------|---|---|
| MFS/sugartransportprotein                  | 1 | 1 |
| MoaCfamily                                 | 1 | 1 |
| Pet100                                     | 1 | 1 |
| Nucleotidehydrolase                        | 1 | 1 |
| UncharacterisedproteinfamilyUPF0047        | 1 | 1 |
| Zinc-fingerdomain                          | 3 | 3 |
| 3'5'-cyclicnucleotidephosphodiesterase     | 1 | 1 |
| RibosomalproteinL1p/L10efamily             | 3 | 3 |
| WSTF,HB1,Irc1p,MBD9motif1                  | 1 | 1 |
| G10protein                                 | 1 | 1 |
| Eukaryoticproteinofunknownfunction(DUF846) | 1 | 1 |
| Fcf1                                       | 1 | 1 |
| Transmembraneprotein33/NucleoporinPOM33    | 1 | 1 |
| Palmitoylproteinthioesterase               | 1 | 1 |
| CVNHdomain                                 | 1 | 1 |
| Ferritin-likedomain                        | 3 | 3 |
| Mitoticcheckpointprotein                   | 1 | 1 |
| OligosaccharyltransferaseSTT3subunit       | 1 | 1 |
| ECL1/2/3zincbindingproteins                | 1 | 1 |
| Dualspecificityphosphatase,catalyticdomain | 3 | 3 |
| Homeodomain                                | 3 | 3 |
| Alphaandgammaadaptinbindingproteinp34      | 1 | 1 |
| Omp85superfamilydomain                     | 1 | 1 |
| DNA/pantothentatemetabolismflavoprotein    | 1 | 1 |
| WWdomainbindingprotein11                   | 1 | 1 |
| Glycosylhydrolasesfamily31                 | 1 | 1 |
| Pre-rRNA-processingproteinTSR2             | 1 | 1 |
| BSDdomain                                  | 1 | 1 |
| Glucose-repressibleproteinGrg1             | 1 | 1 |
| Invertebrate-AID/APOBEC-deaminase          | 1 | 1 |

|                                                |   |   |
|------------------------------------------------|---|---|
| Cytochromeoxidaseassemblyprotein               | 1 | 1 |
| Sucrase/ferredoxin-like                        | 1 | 1 |
| 4'-phosphopantetheinyltransferasesuperfamily   | 1 | 1 |
| YIF1                                           | 1 | 1 |
| ConservedhypotheticalATPbindingprotein         | 3 | 3 |
| Nuclearporeassemblyandbiogenesis               | 1 | 1 |
| Proteinofunknownfunction(DUF3074)              | 1 | 1 |
| TAFII55proteinconservedregion                  | 1 | 1 |
| Serine-threonineproteinkinase19                | 1 | 1 |
| ProteasomecomplexsubunitRpn13ubiquitinreceptor | 1 | 1 |
| RibosomalproteinL6e                            | 1 | 1 |
| ATP10protein                                   | 1 | 1 |
| RibosomalL29protein                            | 1 | 1 |
| HCNGP-likeprotein                              | 1 | 1 |
| Proteinofunknownfunction(DUF3712)              | 3 | 3 |
| TspO/MBRfamily                                 | 1 | 1 |
| Thymidylatesynthase                            | 1 | 1 |
| ERmembraneproteinSH3                           | 1 | 1 |
| RED-likeproteinN-terminalregion                | 1 | 1 |
| Subunit17ofMediatorcomplex                     | 1 | 1 |
| MethyltransferaseTYW3                          | 1 | 1 |
| ProteinofUnknownfunction(DUF1690)              | 1 | 1 |
| Carboxyltransferasedomain                      | 1 | 1 |
| PeptidaseinhibitorI78family                    | 1 | 1 |
| TranslationmachineryassociatedTMA7             | 1 | 1 |
| DNAdirectedRNAPolymerase,7kDasubunit           | 1 | 1 |
| HITdomain                                      | 3 | 3 |
| ChAPs(Chs5p-Arf1p-bindingproteins)             | 1 | 1 |
| Symplekin/PTA1N-terminal                       | 1 | 1 |
| Coiled-coildomain-containingprotein56          | 1 | 1 |



|                                                                      |   |   |
|----------------------------------------------------------------------|---|---|
| Sds3-like                                                            | 1 | 1 |
| Prolineracemase                                                      | 3 | 3 |
| DNA double-strand break repair and V(D)J recombination protein XRCC4 | 1 | 1 |
| WLM domain                                                           | 1 | 1 |
| Glycosylhydrolase family 1                                           | 7 | 7 |
| NMT1/THI5 like                                                       | 1 | 1 |
| Vacuolar import and degradation protein                              | 1 | 1 |
| Magonashi protein                                                    | 1 | 1 |
| CENP-S protein                                                       | 1 | 1 |
| PPPDE putative peptidase domain                                      | 1 | 1 |
| NADAR domain                                                         | 1 | 1 |
| Vacuolar protein sorting-associated protein 35                       | 1 | 1 |
| Myo-inositol oxygenase                                               | 1 | 1 |
| Fungal protein of unknown function (DUF2011)                         | 1 | 1 |
| Cysteine-rich secretory protein family                               | 1 | 1 |
| Arrestin (or S-antigen), C-terminal domain                           | 1 | 1 |
| NDT80/PhoG like DNA-binding family                                   | 1 | 1 |
| Mitochondrial ATPase expression                                      | 1 | 1 |
| Alginate lyase                                                       | 1 | 1 |
| Electron transfer DM13                                               | 1 | 1 |
| EXPERA (EXPanded EBP superfamily)                                    | 1 | 1 |
| Snoal-like polyketide cyclase                                        | 1 | 1 |
| Universal stress protein family                                      | 1 | 1 |
| Surp module                                                          | 1 | 1 |
| Nitronate monooxygenase                                              | 7 | 7 |
| 3,4-dihydroxy-2-butanone 4-phosphate synthase                        | 1 | 1 |
| Eukaryotic initiation factor 4E                                      | 3 | 3 |
| Zinc-finger of the MIZ type in Nse subunit                           | 1 | 1 |
| Spinocerebellar ataxia type 10 protein domain                        | 1 | 1 |
| Phosphorylase superfamily                                            | 1 | 1 |

|                                                           |   |   |
|-----------------------------------------------------------|---|---|
| TransportandGolgiorganisation2                            | 1 | 1 |
| Deuterolysinmetalloprotease(M35)family                    | 1 | 1 |
| Dolichol-phosphatemannosyltransferasesubunit3(DPM3)       | 1 | 1 |
| Oxidoreductase-likeprotein,N-terminal                     | 1 | 1 |
| STAGdomain                                                | 1 | 1 |
| UreDureaseaccessoryprotein                                | 1 | 1 |
| HNHendonuclease                                           | 1 | 1 |
| TransmembraneadaptorErv26                                 | 1 | 1 |
| Methylenetetrahydrofolatereductase                        | 3 | 3 |
| Proteasomestabiliser                                      | 1 | 1 |
| 56kDaseleniumbindingprotein(SBP56)                        | 1 | 1 |
| NADH-ubiquinoneoxidoreductaseASHIsubunit(CI-ASHIorNDUFB8) | 1 | 1 |
| Yeastmitochondrialdistributionandmorphology(MDM)proteins  | 1 | 1 |
| TranslationinitiationfactoreIF3subunit                    | 1 | 1 |
| Alternativeoxidase                                        | 1 | 1 |
| CBF/Mak21family                                           | 3 | 3 |
| GRFzincfinger                                             | 1 | 1 |
| Adenylylsulphatekinase                                    | 1 | 1 |
| V-ATPasesubunitC                                          | 1 | 1 |
| Modifierofrudimentary(Mod(r))protein                      | 1 | 1 |
| Nuclearporeprotein84/107                                  | 1 | 1 |
| NitrogenPermeaseregulatorofaminoacidtransportactivity3    | 1 | 1 |
| Rgp1                                                      | 1 | 1 |
| Fungalfamilyofunknownfunction(DUF1776)                    | 1 | 1 |
| Eukaryoticphosphomannomutase                              | 1 | 1 |
| Ykl077w/Psg1(Pma1StabilizationinGolgi)                    | 1 | 1 |
| JmjCdomain,hydroxylase                                    | 1 | 1 |
| Complex1protein(LYRfamily)                                | 1 | 1 |
| Anaphase-promotingcomplexAPCsubunitCDC26                  | 1 | 1 |
| BolA-likeprotein                                          | 5 | 5 |

|                                                          |    |    |
|----------------------------------------------------------|----|----|
| VPS28protein                                             | 1  | 1  |
| Noc2pfamily                                              | 1  | 1  |
| NAD(P)-bindingRossmann-likedomain                        | 1  | 1  |
| 3-octaprenyl-4-hydroxybenzoatecarboxy-lyase              | 1  | 1  |
| RNAcapguanine-N2methyltransferase                        | 1  | 1  |
| Metallo-beta-lactamasesuperfamily                        | 5  | 5  |
| Sulphurtransport                                         | 1  | 1  |
| GRASP55/65PDZ-likedomain                                 | 1  | 1  |
| AutophagyproteinApg5                                     | 1  | 1  |
| LETM1-likeprotein                                        | 1  | 1  |
| SCP-2steroltransferfamily                                | 1  | 1  |
| cwf18pre-mRNAsplicingfactor                              | 1  | 1  |
| CytochromecoxidasebiogenesisproteinCmc1like              | 1  | 1  |
| RibosomalproteinL17                                      | 1  | 1  |
| Delta-aminolevulinicaciddehydratase                      | 1  | 1  |
| Proteinofunknownfunction(DUF1279)                        | 1  | 1  |
| Mitochondrialimport2                                     | 1  | 1  |
| ExosomecomplexexonucleaseRRP4N-terminalregion            | 1  | 1  |
| Mitochondrialribosomalsubunitprotein                     | 1  | 1  |
| Domainofunknownfunction(DUF202)                          | 1  | 1  |
| RNAPolymeraseI-specifictranscriptioninitiationfactorRRN3 | 1  | 1  |
| Tctex-1family                                            | 1  | 1  |
| Zinccarboxypeptidase                                     | 5  | 5  |
| Dopey,N-terminal                                         | 1  | 1  |
| ribonuclease                                             | 29 | 29 |
| RibosomalproteinS36,mitochondrial                        | 1  | 1  |
| RibosomalL28family                                       | 1  | 1  |
| AutophagyproteinAtg8ubiquitinlike                        | 1  | 1  |
| Disorderedregionofunknownfunction(DUF5315)               | 1  | 1  |
| UbiAprenyltransferasefamily                              | 1  | 1  |

|                                                       |   |   |
|-------------------------------------------------------|---|---|
| Mo25-like                                             | 1 | 1 |
| RibosomalproteinL11methyltransferase(PrmA)            | 1 | 1 |
| Uso1/p115likevesicletetheringprotein,headregion       | 1 | 1 |
| Mitochondrialpyruvatecarriers                         | 1 | 1 |
| ProteasomematurationfactorUMP1                        | 1 | 1 |
| Proteinofunknownfunction(DUF1077)                     | 1 | 1 |
| SNARE-complexproteinSyntaxin-18N-terminus             | 1 | 1 |
| Plastocyanin-likedomain                               | 1 | 1 |
| TubulinfoldingcofactorDCterminal                      | 1 | 1 |
| STIMATEfamily                                         | 1 | 1 |
| Domainofunknownfunction(DUF1961)                      | 1 | 1 |
| Basicregionleucinezipper                              | 1 | 1 |
| FAM192A/Fyv6,N-terminaldomain                         | 1 | 1 |
| InnermembraneproteinimportcomplexsubunitTim54         | 1 | 1 |
| KinetochoreproteinCHL4like                            | 1 | 1 |
| Nucleotideexchange factorSIL1                         | 1 | 1 |
| 6,7-dimethyl-8-ribityllumazinesynthase                | 1 | 1 |
| Hsp20/alphacrystallinfamily                           | 1 | 1 |
| Arp2/3complex,34kDsubunitp34-Arc                      | 1 | 1 |
| Vacuolarproteinorting-associatedprotein26             | 1 | 1 |
| CentromereproteinH(CENP-H)                            | 1 | 1 |
| Staphylococcalnucleasehomologue                       | 1 | 1 |
| Respiratory-chainNADHdehydrogenase,49Kdsubunit        | 1 | 1 |
| Corticalproteinmarkerforcellpolarity                  | 1 | 1 |
| MitochondrialATPsynthaseBchainprecursor(ATP-synt_B)   | 1 | 1 |
| Telomere lengthregulationprotein                      | 1 | 1 |
| DNArepairmetallo-beta-lactamase                       | 1 | 1 |
| Splicingfactor3Bsubunit1                              | 3 | 3 |
| CCAAT-bindingtranscriptionfactor(CBF-B/NF-YA)subunitB | 1 | 1 |
| ASF1likehistonechaperone                              | 1 | 1 |

|                                                             |   |   |
|-------------------------------------------------------------|---|---|
| Suppressorofforkedprotein(Suf)                              | 1 | 1 |
| L-asparaginaseII                                            | 1 | 1 |
| DASHcomplexsubunitDad4                                      | 1 | 1 |
| YL1nuclearproteinC-terminaldomain                           | 1 | 1 |
| Got1/Sft2-likefamily                                        | 1 | 1 |
| Profilin                                                    | 1 | 1 |
| CytochromecoxidaseassemblyproteinCOX16                      | 1 | 1 |
| PRP38family                                                 | 1 | 1 |
| VRR-NUCdomain                                               | 1 | 1 |
| Survivalmotorneuron(SMN)interactingprotein1(SIP1)           | 1 | 1 |
| Ribonucleotidereductaseinhibitor                            | 1 | 1 |
| RibosomalproteinS27                                         | 1 | 1 |
| SRP40,C-terminaldomain                                      | 1 | 1 |
| Glutaminase                                                 | 1 | 1 |
| Translationmachinery-associatedprotein16                    | 1 | 1 |
| BNRrepeat-likedomain                                        | 1 | 1 |
| Mitochondrialglycoprotein                                   | 1 | 1 |
| Gamma-glutamyltranspeptidase                                | 1 | 1 |
| Semialdehydedehydrogenase,NADbindingdomain                  | 1 | 1 |
| Carbonicanhydrase                                           | 1 | 1 |
| Domainofunknownfunction(DUF1989)                            | 1 | 1 |
| Glucosamine-6-phosphateisomerases/6-phosphogluconolactonase | 3 | 3 |
| CysteinedioxygenasetypeI                                    | 1 | 1 |
| MAS20proteinimportreceptor                                  | 1 | 1 |
| Proteinofunknownfunction(DUF3112)                           | 1 | 1 |
| Gammainterferoninduciblelysosomalthiolreductase(GILT)       | 1 | 1 |
| Cns1/TTC4Wheeldomain                                        | 1 | 1 |
| TAP42-likefamily                                            | 1 | 1 |
| Reticulon                                                   | 1 | 1 |
| AMMECR1                                                     | 1 | 1 |

|                                                              |   |   |
|--------------------------------------------------------------|---|---|
| DASHcomplexsubunitAsk1                                       | 1 | 1 |
| OPToligopeptidetransporterprotein                            | 3 | 3 |
| 5-formyltetrahydrofolatecyclo-ligasefamily                   | 1 | 1 |
| Microfibril-associated/Pre-mRNAprocessing                    | 1 | 1 |
| Signalrecognitionparticlereceptorbetasubunit                 | 1 | 1 |
| Succinatedehydrogenase/Fumaratereductasetransmembranesubunit | 3 | 3 |
| TranslationinitiationfactorIF-3,C-terminaldomain             | 1 | 1 |
| Phosphatidylethanolamine-bindingprotein                      | 3 | 3 |
| RibosomalL27protein                                          | 1 | 1 |
| Proteinphosphataseinhibitor2(IPP-2)                          | 1 | 1 |
| UV-endonucleaseUvdE                                          | 1 | 1 |
| Thymidylatekinase                                            | 1 | 1 |
| GLE1-likeprotein                                             | 1 | 1 |
| ACTdomain                                                    | 1 | 1 |
| Proteinofunknownfunction(DUF1115)                            | 1 | 1 |
| HydrophobicsurfacebindingproteinA                            | 1 | 1 |
| 10TMAcylTransferasedomainfoundinCas1p                        | 3 | 3 |
| MitochondrialproteinPet127                                   | 1 | 1 |
| Ornithinecyclodeaminase/mu-crystallinfamily                  | 1 | 1 |
| BCCIP                                                        | 1 | 1 |
| Proteinofunknownfunction(DUF2418)                            | 1 | 1 |
| ATPsynthase(F/14-kDa)subunit                                 | 1 | 1 |
| MLdomain                                                     | 1 | 1 |
| Sec8exocystcomplexcomponentspecificdomain                    | 1 | 1 |
| Glycosyltransferasefamily4                                   | 1 | 1 |
| K+potassiumtransporter                                       | 1 | 1 |
| OrganicsolutetransporterOstalpha                             | 1 | 1 |
| SMI1/KNR4family(SUKH-1)                                      | 1 | 1 |
| Putativediphthamidesynthesisprotein                          | 1 | 1 |
| MitosisproteinDIM1                                           | 1 | 1 |

|                                                             |   |   |
|-------------------------------------------------------------|---|---|
| Proteinofunknownfunction(DUF1769)                           | 1 | 1 |
| Polysaccharidebiosynthesis                                  | 1 | 1 |
| Purinenucleosidepermease(NUP)                               | 1 | 1 |
| Fungalproteinofunknownfunction(DUF1748)                     | 1 | 1 |
| GlycosylHydrolaseFamily88                                   | 1 | 1 |
| Oligosaccharyltransferase48kDasubunitbeta                   | 1 | 1 |
| IntegralmembraneproteinSlinkingtothetransGolginetwork       | 1 | 1 |
| CytochromeoxidasecsubunitVIb                                | 3 | 3 |
| Phosphatidylinositol-4-phosphate5-Kinase                    | 1 | 1 |
| NACHTdomain                                                 | 1 | 1 |
| DNAreplicationandcheckpointprotein                          | 1 | 1 |
| CENP-Q,aCENPA-CADcentromerecomplexsubunit                   | 1 | 1 |
| Nop14-likefamily                                            | 1 | 1 |
| ProteinadenylyltransferaseSelO                              | 1 | 1 |
| Smallacidicproteinfamily                                    | 1 | 1 |
| RibosomeassociatedmembraneproteinRAMP4                      | 1 | 1 |
| TB2/DP1,HVA22family                                         | 1 | 1 |
| RFXDNA-bindingdomain                                        | 1 | 1 |
| Frag1/DRAM/Sfk1family                                       | 1 | 1 |
| RibosomalproteinS13/S18                                     | 1 | 1 |
| Trm112p-likeprotein                                         | 1 | 1 |
| Nucleolarprotein12(25kDa)                                   | 1 | 1 |
| Tropomyosinlike                                             | 1 | 1 |
| Domainofunknownfunction(DUF4202)                            | 1 | 1 |
| CyanatylaseC-terminaldomain                                 | 1 | 1 |
| EukaryoticrRNAprocessingproteinEBP2                         | 1 | 1 |
| PhosphatidylinositolN-acetylglucosaminyltransferasesubunitY | 1 | 1 |
| Domainofunknownfunction(DUF4203)                            | 1 | 1 |
| RibosomalL38proteinfamily                                   | 1 | 1 |
| COG(conservedoligomericGolgi)complexcomponent,COG2          | 1 | 1 |

|                                                     |   |   |
|-----------------------------------------------------|---|---|
| HAUSaugmin-likecomplexsubunit6N-terminus            | 1 | 1 |
| OutermembraneproteinTOM13                           | 1 | 1 |
| 60Kdinnermembraneprotein                            | 1 | 1 |
| Proteinofunknownfunction(DUF1688)                   | 1 | 1 |
| GIY-YIGcatalyticdomain                              | 1 | 1 |
| CoA-ligase                                          | 1 | 1 |
| Glycosylhydrolasefamily12                           | 1 | 1 |
| N-acetyltransferase                                 | 7 | 7 |
| LysMdomain                                          | 1 | 1 |
| Vacuolarproteinorting-associatedprotein62           | 1 | 1 |
| RibosomalproteinL19                                 | 1 | 1 |
| TranscriptionfactorTFIIHcomplexsubunitTfb5          | 1 | 1 |
| RibosomalL22eproteinfamily                          | 1 | 1 |
| HhH-GPDsuperfamilybaseexcisionDNArepairprotein      | 1 | 1 |
| Integralperoxisomalmembraneperoxin                  | 1 | 1 |
| Celldivisioncontrolprotein14,SINcomponent           | 1 | 1 |
| Rer1family                                          | 1 | 1 |
| Paf1                                                | 1 | 1 |
| MoaEprotein                                         | 1 | 1 |
| ATPsynthase(E/31kDa)subunit                         | 1 | 1 |
| HeterokaryonincompatibilityproteinHet-C             | 1 | 1 |
| Rix1complexcomponentinvolvedin60Sribosomematuration | 1 | 1 |
| RanGTP-bindingprotein                               | 1 | 1 |
| RXT2-like,N-terminal                                | 1 | 1 |
| Riboflavinkinase                                    | 1 | 1 |
| CopperfistDNAbindingdomain                          | 1 | 1 |
| DNArepairproteinCrb2Tudordomain                     | 1 | 1 |
| SYF2splicingfactor                                  | 1 | 1 |
| homogentisate1,2-dioxygenase                        | 3 | 3 |
| Sen15protein                                        | 1 | 1 |



|                                                              |   |   |
|--------------------------------------------------------------|---|---|
| AhpC/TSAantioxidantenzyme                                    | 1 | 1 |
| SCA7,zinc-bindingdomain                                      | 1 | 1 |
| Beta-1,3-glucanase                                           | 1 | 1 |
| Domainofunknownfunction(DUF4112)                             | 1 | 1 |
| Ribonucleotidereductase,smallchain                           | 1 | 1 |
| Signalrecognitionparticle9kDaprotein(SRP9)                   | 1 | 1 |
| Proteinofunknownfunction(DUF1682)                            | 1 | 0 |
| Cutinase                                                     | 1 | 1 |
| RibosomalL37aeproteinfamily                                  | 1 | 1 |
| SaccharopinedehydrogenaseNADPbindingdomain                   | 1 | 1 |
| VanZlikefamily                                               | 1 | 1 |
| Protein-tyrosinephosphatase                                  | 1 | 1 |
| Regulatorofchromosomecondensation(RCC1)repeat                | 1 | 1 |
| Sec34-likefamily                                             | 1 | 1 |
| RINT-1/TIP-1family                                           | 1 | 1 |
| Ca <sup>2+</sup> regulatorandmembranefusionproteinFig1       | 1 | 1 |
| Programmedcelldeathprotein2,C-terminalputativedomain         | 1 | 1 |
| NIF3(NGG1pinteractingfactor3)                                | 1 | 1 |
| RecQmediatedgenomeinstabilityprotein                         | 1 | 1 |
| Proteinofunknownfunction(DUF2370)                            | 1 | 1 |
| Protein-L-isoaspartate(D-aspartate)O-methyltransferase(PCMT) | 1 | 1 |
| Phosphopantetheineattachmentsite                             | 1 | 1 |
| GRIM-19protein                                               | 1 | 1 |
| SOCE-associatedregulatoryfactorofcalciumhomoeostasis         | 1 | 1 |
| Utp11protein                                                 | 1 | 1 |
| Domainofunknownfunction(DUF4440)                             | 1 | 1 |
| EndoplasmicReticulumOxidoreductin1(ERO1)                     | 1 | 1 |
| Vps54-likeprotein                                            | 1 | 1 |
| RIO1family                                                   | 1 | 1 |
| RNAdependentRNAPolymerase                                    | 1 | 1 |

|                                             |   |   |
|---------------------------------------------|---|---|
| StressresponsiveA/BBarrelDomain             | 1 | 1 |
| Malate/L-lactatedehydrogenase               | 1 | 1 |
| VEFS-Boxofpolycombprotein                   | 1 | 1 |
| Putativeserineesterase(DUF676)              | 1 | 1 |
| Diacylglycerolacyltransferase               | 1 | 1 |
| Rox3mediatorcomplexsubunit                  | 1 | 1 |
| SRP19protein                                | 1 | 1 |
| Uroporphyrinogendecarboxylase(URO-D)        | 1 | 1 |
| Dor1-likefamily                             | 1 | 1 |
| Timelessprotein                             | 1 | 1 |
| Glycogensynthase                            | 1 | 1 |
| RibosomalproteinS6                          | 3 | 3 |
| Ribosomalproteins50S-L15,50S-L18e,60S-L27A  | 1 | 1 |
| OHCUdecarboxylase                           | 1 | 1 |
| Polysaccharidepyruvyltransferase            | 1 | 1 |
| Proteinofunknownfunction(DUF2470)           | 1 | 1 |
| SNAREassociatedGolgiiprotein                | 1 | 1 |
| RibosomalproteinS6e                         | 1 | 1 |
| LsmADdomain                                 | 1 | 1 |
| HITzincfinger                               | 1 | 1 |
| OsmC-likeprotein                            | 1 | 1 |
| Domainofunknownfunction(DUF5102)            | 1 | 1 |
| MitochondrialATPaseinhibitor,IATP           | 1 | 1 |
| Formate/nitritetransporter                  | 1 | 1 |
| MitochondrialribosomalproteinmL59           | 1 | 1 |
| CytochromecoxidasesubunitIV                 | 1 | 1 |
| GYFdomain                                   | 1 | 1 |
| Silencingdefective2N-terminalubiquitinomain | 1 | 1 |
| Plectin/S10domain                           | 1 | 1 |
| Proteinphosphataseinhibitor                 | 3 | 3 |

|                                                    |   |   |
|----------------------------------------------------|---|---|
| Glu-tRNA <sup>Gln</sup> amidotransferase C subunit | 1 | 1 |
| Soluble NSF attachment protein, SNAP               | 1 | 1 |
| BNR repeat-containing family member                | 1 | 1 |
| Domain of unknown function (DUF4185)               | 1 | 1 |
| Apolipoprotein O                                   | 1 | 1 |
| RNA 2'-phosphotransferase, Tpt1/KptA family        | 1 | 1 |
| Double-stranded RNA binding motif                  | 1 | 1 |
| rRNA-processing protein Efg1                       | 1 | 1 |
| Zinc-ribbon like family                            | 1 | 1 |
| TIP41-like family                                  | 1 | 1 |
| Peptidase M76 family                               | 1 | 1 |
| Eukaryotic and archaeal DNA primase, large subunit | 1 | 1 |
| Protein of unknown function (DUF3533)              | 1 | 1 |
| Male sterility protein                             | 0 | 1 |
| Ketopantoate reductase PanE/ApbA                   | 5 | 7 |
| Bacterial protein of unknown function (DUF885)     | 0 | 1 |
| Glycosyltransferase family 28C-terminal domain     | 0 | 1 |

**Supplementary data 2-Table 3 : predicted accessory-gene families of *Fusarium oxysporum*. f. sp *albedinis* strains.**

| Gene families                                    | <i>Fusarium oxysporum</i> . f. sp <i>albedinis</i> 133 | <i>Fusarium oxysporum</i> . f. sp <i>albedinis</i> 9 |
|--------------------------------------------------|--------------------------------------------------------|------------------------------------------------------|
|                                                  | Gene count                                             | Gene count                                           |
| Sugar(andothert)transporter                      | 278                                                    | 291                                                  |
| AuxiliaryActivityfamily9(formerlyGH61)           | 21                                                     | 19                                                   |
| Acyl-CoAdehydrogenase,C-terminaldomain           | 15                                                     | 15                                                   |
| Phosphorylasesuperfamily                         | 29                                                     | 27                                                   |
| WDdomain,G-betarepeat                            | 51                                                     | 35                                                   |
| Fungalspecifictranscriptionfactordomain          | 692                                                    | 693                                                  |
| N-terminaldomainofNWDNACHT-NTPase                | 13                                                     | 9                                                    |
| Tc5transposaseDNA-bindingdomain                  | 41                                                     | 41                                                   |
| Ankyrinrepeats(3copies)                          | 222                                                    | 202                                                  |
| FungalZn(2)-Cys(6)binuclearclusterdomain         | 249                                                    | 239                                                  |
| DDEsuperfamilyendonuclease                       | 172                                                    | 533                                                  |
| Zincfinger,C2H2type                              | 43                                                     | 51                                                   |
| Poly(ADP-ribose)polymerasecatalyticdomain        | 21                                                     | 22                                                   |
| Helitronhelicase-likedomainatN-terminus          | 29                                                     | 146                                                  |
| Reversetranscriptase(RNA-dependentDNAPolymerase) | 106                                                    | 304                                                  |
| Cyclin,N-terminaldomain                          | 31                                                     | 34                                                   |
| RegulatorofGproteinsignalingdomain               | 9                                                      | 9                                                    |
| Cutinase                                         | 19                                                     | 19                                                   |
| Sodium:neurotransmittersymporterfamily           | 5                                                      | 3                                                    |
| CoAbindingdomain                                 | 9                                                      | 7                                                    |
| helix-turn-helix,Psqdomain                       | 13                                                     | 7                                                    |
| TransposaseIS4                                   | 62                                                     | 92                                                   |
| E1-E2ATPase                                      | 23                                                     | 31                                                   |
| DEAD/DEAHboxhelicase                             | 35                                                     | 31                                                   |
| Prolyloligopeptidasefamily                       | 13                                                     | 13                                                   |

|                                               |     |     |
|-----------------------------------------------|-----|-----|
| Tetratricopeptiderepeat                       | 35  | 33  |
| Conservedmidregionofcactin                    | 1   | 1   |
| Responseregulatorreceiverdomain               | 17  | 15  |
| MULEtransposasedomain                         | 35  | 165 |
| CytochromeP450                                | 305 | 312 |
| Slx4endonuclease                              | 1   | 1   |
| Heterokaryonincompatibilityprotein(HET)       | 262 | 263 |
| tRNAsynthetasesclassII(D,KandN)               | 7   | 7   |
| MatE                                          | 9   | 9   |
| FMN-dependentdehydrogenase                    | 27  | 27  |
| KRdomain                                      | 7   | 5   |
| PIF1-likehelicase                             | 31  | 25  |
| CBSdomain                                     | 7   | 7   |
| Zincfinger,ZZtype                             | 3   | 3   |
| Glycosylhydrolasesfamily2                     | 33  | 31  |
| Zinc-bindingdehydrogenase                     | 113 | 115 |
| Stress-inducedbacterialacidophilicrepeatmotif | 5   | 5   |
| GAG-pre-integrasedomain                       | 5   | 5   |
| RhoGAPdomain                                  | 5   | 5   |
| Pectatelyase                                  | 23  | 23  |
| AminotransferaseclassIandII                   | 51  | 50  |
| HMGL-like                                     | 5   | 5   |
| FADbindingdomain                              | 228 | 231 |
| Carboxylesterasefamily                        | 71  | 72  |
| Proteinofunknownfunction(DUF3500)             | 11  | 11  |
| Proteinofunknownfunction(DUF3435)             | 13  | 11  |
| RNaseH-likedomainfoundinreversetranscriptase  | 13  | 94  |
| HelicaseconservedC-terminaldomain             | 19  | 15  |
| AlcoholdehydrogenaseGroES-likedomain          | 71  | 74  |
| Middleorthirddomainofpeptidase_M16            | 7   | 7   |

|                                                          |     |     |
|----------------------------------------------------------|-----|-----|
| Endonuclease-reversetranscriptase                        | 22  | 19  |
| CoA-ligase                                               | 1   | 1   |
| Subtilasefamily                                          | 66  | 69  |
| NterminusofRad21/Rec8likeprotein                         | 5   | 9   |
| Proteinofunknownfunction(DUF3295)                        | 25  | 25  |
| PutativeERtransporter,6TM,N-terminal                     | 7   | 7   |
| Ubiquitinfamily                                          | 7   | 7   |
| Lateexocytosis,associatedwithGolgitransport              | 1   | 0   |
| Mono-functionalDNA-alkylatingmethylethanesulfonateN-term | 1   | 1   |
| Extracellulartail,of10TMputativephosphatetransporter     | 5   | 0   |
| Voltage-dependentanionchannel                            | 15  | 15  |
| Up-frameshiftsuppressor2                                 | 1   | 1   |
| Mo-cooxidoreductasedimerisationdomain                    | 1   | 1   |
| Regulatorofchromosomecondensation(RCC1)repeat            | 9   | 11  |
| Histidinekinase-,DNAgyraseB-,andHSP90-likeATPase         | 15  | 13  |
| Adenylatecyclaseassociated(CAP)Cterminal                 | 1   | 1   |
| Sec23/Sec24trunkdomain                                   | 1   | 1   |
| Glycosyltransferasefamily41                              | 1   | 1   |
| RecF/RecN/SMCNterminaldomain                             | 3   | 3   |
| PutativeTPR-likerepeat                                   | 1   | 1   |
| Sec7domain                                               | 3   | 3   |
| DNApolymerasebetathumb                                   | 1   | 1   |
| Glycosylhydrolasefamily47                                | 9   | 9   |
| EF-handdomainpair                                        | 3   | 3   |
| Ringhydroxylatingalphasubunit(catalyticdomain)           | 9   | 9   |
| Ubiquitincoaxyl-terminalhydrolase,family1                | 3   | 3   |
| SAPdomain                                                | 1   | 9   |
| Proteinkinasedomain                                      | 187 | 197 |
| Ferricreductaseliketranmembranecomponent                 | 21  | 19  |
| CAP-Glydomain                                            | 1   | 1   |

|                                                                  |    |    |
|------------------------------------------------------------------|----|----|
| Pre-mRNA3'-end-processingendonucleasepolyadenylationfactorC-term | 1  | 1  |
| RNA12protein                                                     | 1  | 1  |
| AMP-bindingenzyme                                                | 91 | 87 |
| Calcineurin-likephosphoesterase                                  | 31 | 33 |
| IMPdehydrogenase/GMPreductasedomain                              | 1  | 1  |
| PutativeTOS1-likeglycosylhydrolase(DUF2401)                      | 1  | 1  |
| Proteinofunknownfunction(DUF3433)                                | 9  | 7  |
| GolgiCORVETcomplexcorevacuolarprotein8                           | 1  | 1  |
| UbiquitincooXyl-terminalhydrolase                                | 13 | 11 |
| RNArecognitionmotif.(a.k.a.RRM,RBD,orRNPdomain)                  | 45 | 45 |
| non-haemdioxygenaseinmorphinesynthesisN-terminal                 | 15 | 13 |
| Glycosylhydrolasefamily3C-terminaldomain                         | 45 | 40 |
| Sel1repeat                                                       | 5  | 5  |
| Zincknucle                                                       | 15 | 25 |
| Autophagy-relatedprotein2CADmotif                                | 1  | 1  |
| Spermine/spermidinesynthasedomain                                | 1  | 1  |
| Conidiationprotein6                                              | 1  | 1  |
| RibosomalRNA-processingprotein7(RRP7)C-terminaldomain            | 1  | 1  |
| Glutaminesynthetase,catalyticdomain                              | 7  | 7  |
| HhH-GPDsuperfamilybaseexcisionDNArepairprotein                   | 3  | 3  |
| Bacterialalpha-L-rhamnosidase6hairpinglycosidasedomain           | 33 | 33 |
| Cytochromedomainofcellobiosedehydrogenase                        | 9  | 9  |
| SpoUrRNAMethylasefamily                                          | 1  | 1  |
| YL1nuclearprotein                                                | 1  | 1  |
| Domainofunknownfunction(DUF1744)                                 | 1  | 1  |
| Eukaryotictranslationinitiationfactor3subunit8N-terminus         | 1  | 1  |
| RibosomalproteinS10p/S20e                                        | 1  | 1  |
| Oxidoreductasefamily,NAD-bindingRossmannfold                     | 25 | 33 |
| UEVdomain                                                        | 1  | 1  |
| Glycosylhydrolasefamily45                                        | 1  | 1  |

|                                                          |    |    |
|----------------------------------------------------------|----|----|
| RNApolymeraseRpb2,domain6                                | 1  | 1  |
| ElongationfactorTuGTPbindingdomain                       | 9  | 9  |
| NADH:flavinoxidoreductase/NADHoxidasefamily              | 39 | 43 |
| ABC-2typetransporter                                     | 30 | 31 |
| RibonucleasesP/MRPproteinsubunitPOP1                     | 1  | 1  |
| GlutathioneS-transferase,C-terminaldomain                | 5  | 5  |
| AAAdomain                                                | 27 | 24 |
| C-5cytosine-specificDNAmethylase                         | 3  | 3  |
| Prenylcysteinelyase                                      | 1  | 1  |
| VID27C-terminalWD40-likedomain                           | 1  | 1  |
| Phosphatidylinositol3-and4-kinase                        | 3  | 3  |
| Glutamineamidotransferaseclass-I                         | 5  | 5  |
| NFACTproteinC-terminaldomain                             | 1  | 1  |
| Phosphatidylinositol-specificphospholipaseC,Xdomain      | 13 | 15 |
| Cellulase(glycosylhydrolasefamily5)                      | 19 | 19 |
| ABCtransportertransmembraneregion                        | 35 | 31 |
| RibosomalproteinS2                                       | 7  | 7  |
| MRG                                                      | 1  | 1  |
| Asparaginase                                             | 7  | 7  |
| Thiolase,N-terminaldomain                                | 9  | 7  |
| FerricreductaseNADbindingdomain                          | 11 | 11 |
| Sec23-bindingdomainofSec16                               | 1  | 1  |
| SnoaL-likedomain                                         | 24 | 22 |
| TLCdomain                                                | 3  | 3  |
| ATPasefamilyassociatedwithvariouscellularactivities(AAA) | 45 | 43 |
| Myb-likeDNA-bindingdomain                                | 23 | 25 |
| Aminotransferaseclass-III                                | 17 | 17 |
| Pep3/Vps18/deeporangefamily                              | 1  | 1  |
| Domainofunknownfunction(DUF3517)                         | 1  | 1  |
| SAPK-interactingprotein1(Sin1),middleCRIMdomain          | 1  | 1  |



|                                                |     |     |
|------------------------------------------------|-----|-----|
| Arginasefamily                                 | 11  | 11  |
| Anaphase-promotingcomplex,cyclosome,subunit4   | 1   | 1   |
| Phenylalanyl-tRNA-synthetasebetachainCLMdomain | 1   | 1   |
| Intron-bindingproteinaquariusN-terminus        | 1   | 1   |
| MIF4Gdomain                                    | 1   | 1   |
| Fcf1                                           | 1   | 1   |
| ribosomalL5PfamilyC-terminus                   | 1   | 1   |
| MajorFacilitatorSuperfamily                    | 541 | 560 |
| TOM7family                                     | 1   | 1   |
| Cohesinloadingfactor                           | 1   | 1   |
| ABCtransportertransmembraneregion2             | 1   | 1   |
| Carbon-nitrogenhydrolase                       | 27  | 27  |
| Elongationfactor1gamma,conserveddomain         | 1   | 1   |
| PeptidaseC13family                             | 1   | 1   |
| MoeAN-terminalregion(domainIandII)             | 3   | 3   |
| Fasciclindomain                                | 9   | 9   |
| Domainofunknownfunction(DUF1729)               | 5   | 5   |
| Beta-lactamasesuperfamilydomain                | 13  | 11  |
| Glycolipid2-alpha-mannosyltransferase          | 3   | 3   |
| Initiationfactor2subunitfamily                 | 1   | 1   |
| DILdomain                                      | 1   | 1   |
| Allantoicaserepeat                             | 1   | 1   |
| impB/mucB/samBfamily                           | 5   | 5   |
| Myosinhead(motordomain)                        | 1   | 1   |
| UBA-likedomain                                 | 1   | 1   |
| ForminHomology2Domain                          | 1   | 1   |
| Velvetfactor                                   | 3   | 3   |
| Ankyrinrepeats(manycopies)                     | 15  | 13  |
| SerinecarboxypeptidaseS28                      | 1   | 1   |
| RNaseH                                         | 33  | 120 |

|                                                      |     |     |
|------------------------------------------------------|-----|-----|
| Aminoacidpermease                                    | 173 | 178 |
| GMCoxidoreductase                                    | 47  | 54  |
| Beta-lactamase                                       | 55  | 51  |
| RibosomalproteinS5,N-terminaldomain                  | 1   | 1   |
| Ferroportin1(FPN1)                                   | 1   | 1   |
| Putativeserineesterase(DUF676)                       | 7   | 7   |
| AconitaseX                                           | 1   | 1   |
| Glycosylhydrolasesfamily31                           | 13  | 13  |
| PeptidasefamilyM20/M25/M40                           | 15  | 15  |
| ThiFfamily                                           | 3   | 3   |
| Calcium-dependentchannel,7TMregion,putativephosphate | 9   | 11  |
| Pyrroline-5-carboxylatereductasedimerisation         | 1   | 1   |
| Catalase                                             | 9   | 9   |
| Glycosyltransferasefamily20                          | 3   | 3   |
| MutSdomainV                                          | 7   | 7   |
| SaccharopinedehydrogenaseC-terminaldomain            | 1   | 0   |
| RTA1likeprotein                                      | 66  | 64  |
| Glycosylhydrolasesfamily2,sugarbindingdomain         | 3   | 3   |
| Phosphoribulokinase/Uridinekinasefamily              | 3   | 3   |
| PX-associated                                        | 1   | 1   |
| Vps16,N-terminalregion                               | 1   | 1   |
| FHADomain                                            | 1   | 1   |
| Haem-degrading                                       | 1   | 1   |
| SNF2-relateddomain                                   | 35  | 35  |
| ABCtransporter                                       | 61  | 57  |
| Endonuclease/Exonuclease/phosphatasefamily           | 7   | 7   |
| Iron/manganesesuperoxidedismutases,C-terminaldomain  | 1   | 1   |
| ATP-NADkinaseC-terminaldomain                        | 1   | 1   |
| Squalene-hopenecyclaseC-terminaldomain               | 1   | 1   |
| Splicingfactor1helix-hairpindomain                   | 1   | 1   |

|                                                              |    |    |
|--------------------------------------------------------------|----|----|
| Carboxyltransferasedomain,subdomainAandB                     | 1  | 1  |
| Lyase                                                        | 7  | 7  |
| Tubulin/FtsZfamily,GTPasedomain                              | 7  | 7  |
| Alpha-L-arabinofuranosidaseB,catalytic                       | 1  | 1  |
| Patatin-likephospholipase                                    | 21 | 29 |
| DNAreplicationfactorDna2                                     | 1  | 1  |
| MnmEhelicaldomain                                            | 1  | 1  |
| Glyoxalase/Bleomycinresistanceprotein/Dioxygenasesuperfamily | 21 | 23 |
| N-Acetylglucosaminyltransferase-IV(GnT-IV)conservedregion    | 3  | 3  |
| ADP-ribosylationfactorfamily                                 | 11 | 11 |
| Domainofunknownfunction(DUF5597)                             | 5  | 5  |
| Actin                                                        | 11 | 11 |
| Isocitrate/isopropylmalatedehydrogenase                      | 9  | 9  |
| DnaJdomain                                                   | 13 | 15 |
| U1smallnuclearribonucleoproteinof70kDaMWNterminal            | 1  | 1  |
| Nucleartransportfactor2(NTF2)domain                          | 1  | 1  |
| Glycosylhydrolasefamily20,catalyticdomain                    | 5  | 5  |
| Glucose-6-phosphatedehydrogenase,C-terminaldomain            | 1  | 1  |
| Choline/Carnitineo-acyltransferase                           | 1  | 1  |
| RibosomalproteinL35Ae                                        | 1  | 1  |
| BCS1Nterminal                                                | 5  | 5  |
| Ubiquitin-conjugatingenzyme                                  | 15 | 15 |
| CationtransportingATPase,C-terminus                          | 15 | 15 |
| PhoDrelatedphosphatase                                       | 3  | 3  |
| PeptidaseM16inactivedomain                                   | 1  | 1  |
| SERRATE/Ars2,N-terminaldomain                                | 1  | 1  |
| Nas2N_terminaldomain                                         | 1  | 1  |
| ATPsynthasealpha/betafamily,nucleotide-bindingdomain         | 5  | 5  |
| Sulfatepermeasefamily                                        | 5  | 11 |
| KHdomain                                                     | 3  | 3  |

|                                                         |    |    |
|---------------------------------------------------------|----|----|
| Glycosylhydrolasefamily10                               | 11 | 13 |
| Not1N-terminaldomain,CCR4-Notcomplexcomponent           | 1  | 1  |
| Glycosylhydrolasesfamily43                              | 39 | 44 |
| SH3domain                                               | 9  | 9  |
| EAP30/Vps36family                                       | 1  | 1  |
| PI31proteasomeregulatorN-terminal                       | 1  | 1  |
| NADbindingdomainof6-phosphogluconatedehydrogenase       | 15 | 19 |
| DIE2/ALG10family                                        | 1  | 1  |
| N2,N2-dimethylguanosinetRNAmethyltransferase            | 1  | 1  |
| Asparaginase,N-terminal                                 | 5  | 5  |
| Mitochondrialcarrierprotein                             | 25 | 27 |
| Thermolysinmetallopeptidase,alpha-helicaldomain         | 1  | 1  |
| Oxoglutarateandiron-dependentoxygenasedegradationC-term | 1  | 1  |
| Phospholipase/Carboxylesterase                          | 7  | 7  |
| ExocystcomplexcomponentSec3                             | 1  | 1  |
| Rieske[2Fe-2S]domain                                    | 0  | 0  |
| Permeasefor cytosine/purines,uracil,thiamine,allantoin  | 19 | 21 |
| Glycosylhydrolasesfamily2,TIMbarreldomain               | 5  | 5  |
| Domainofunknownfunction(DUF5601)                        | 1  | 1  |
| Kelchmotif                                              | 9  | 9  |
| Platelet-activatingfactoracetylhydrolase,isoformII      | 7  | 7  |
| Copperamineoxidase,enzymedomain                         | 13 | 15 |
| Seryl-tRNAsynthetaseN-terminaldomain                    | 1  | 1  |
| Aldehydedehydrogenasefamily                             | 83 | 87 |
| Prolyl-tRNAsynthetase,C-terminal                        | 3  | 1  |
| LIMdomain                                               | 3  | 3  |
| Eukaryoticporin                                         | 1  | 1  |
| RNAhelicase(UPF2interactingdomain)                      | 1  | 1  |
| Glycosylhydrolasefamily7                                | 31 | 31 |
| SH2domain                                               | 1  | 1  |

|                                                             |     |     |
|-------------------------------------------------------------|-----|-----|
| DWNNdomain                                                  | 1   | 1   |
| MmgE/PrpDN-terminaldomain                                   | 3   | 3   |
| NmrA-likefamily                                             | 164 | 152 |
| 2-oxoaciddehydrogenasesacyltransferase(catalyticdomain)     | 7   | 7   |
| NucleoporinFGrepeatregion                                   | 3   | 3   |
| Alpha/betahydrolasefamily                                   | 64  | 67  |
| Polysaccharidedeacetylase                                   | 13  | 15  |
| Chitinsynthase                                              | 9   | 9   |
| UDP-glucose/GDP-mannosedehydrogenasefamily,centraldomain    | 5   | 5   |
| Voltagegatedchloridechannel                                 | 3   | 3   |
| Rapamycin-insensitivecompanionofmTOR,N-term                 | 1   | 1   |
| Trypsin-likepeptidasedomain                                 | 3   | 3   |
| Alkalimetalcation/H <sup>+</sup> antiporterNha1Cterminus    | 1   | 1   |
| HomodimerisationdomainofSGTA                                | 1   | 1   |
| SecondBRCTdomainonNijmegensyndromebreakageprotein           | 1   | 1   |
| TRF2-interactingtelomericprotein/Rap1-Cterminaldomain       | 1   | 1   |
| MetalbindingdomainofAda                                     | 1   | 1   |
| Vaultproteininter-alpha-trypsindomain                       | 3   | 3   |
| N-terminaldomainoflipoylsynthaseofRadical_SAMfamily         | 1   | 1   |
| Pectatylasesuperfamilyprotein                               | 3   | 3   |
| Thioredoxin                                                 | 15  | 15  |
| Multicopperoxidase                                          | 23  | 25  |
| Domainofunknownfunction(DUF4387)                            | 1   | 3   |
| GDSL-likeLipase/Acylyhydrolasefamily                        | 31  | 31  |
| Oxidoreductasemolybdopterinbindingdomain                    | 9   | 7   |
| shortchaindehydrogenase                                     | 243 | 243 |
| Galactoseoxidase,centraldomain                              | 5   | 5   |
| CHATdomain                                                  | 44  | 44  |
| D-isomerspecific2-hydroxyaciddehydrogenase,NADbindingdomain | 19  | 19  |
| GlutathioneS-transferase,N-terminaldomain                   | 31  | 31  |

|                                                        |    |    |
|--------------------------------------------------------|----|----|
| Sulfatase-modifyingfactorenzyme1                       | 3  | 3  |
| N-terminaldomainofoxidoreductase                       | 3  | 3  |
| Alpha-kinasefamily                                     | 3  | 3  |
| ATPadenylyltransferaseC-terminaldomain                 | 5  | 5  |
| Malesterilityprotein                                   | 15 | 19 |
| DipeptidylpeptidaseIV(DPPIV)N-terminalregion           | 1  | 1  |
| JAB1/Mov34/MPN/PAD-1ubiquitinprotease                  | 1  | 1  |
| Aconitasefamily(aconitatehydratase)                    | 5  | 5  |
| Glycosylhydrolasesfamily18                             | 43 | 48 |
| Endoplasmicreticulum-basedfactorforassemblyofV-ATPase  | 1  | 1  |
| Fumarylacetoacetate(FAA)hydrolasefamily                | 30 | 30 |
| Proteinofunknownfunction(DUF3140)                      | 1  | 1  |
| PQlooprepeat                                           | 5  | 5  |
| Flavin-bindingmonooxygenase-like                       | 67 | 73 |
| Protein-tyrosinephosphatase                            | 1  | 1  |
| lactate/malatedehydrogenase,alpha/betaC-terminaldomain | 1  | 1  |
| FADdependentoxidoreductase                             | 83 | 85 |
| PPRrepeat                                              | 3  | 3  |
| Striatinfamily                                         | 1  | 1  |
| Glycerol-3-phosphateacyltransferaseC-terminalregion    | 1  | 1  |
| Domainofunknownfunction(DUF4139)                       | 1  | 1  |
| FYVEzincfinger                                         | 1  | 1  |
| PeptidasefamilyM28                                     | 7  | 7  |
| Phosphoribosylglycinamidesynthetase,ATP-grasp(A)domain | 2  | 3  |
| N-terminaldomainofribosephosphatepyrophosphokinase     | 1  | 1  |
| KuCterminaldomainlike                                  | 1  | 1  |
| COG4transportprotein                                   | 3  | 3  |
| Dihydrofolatereductase                                 | 1  | 1  |
| Dynaminfamily                                          | 15 | 17 |
| Beta-ketoacylsynthase,N-terminaldomain                 | 17 | 17 |

|                                                          |    |    |
|----------------------------------------------------------|----|----|
| Telomere recombination                                   | 3  | 3  |
| OP Toligopeptide transporter protein                     | 21 | 21 |
| WSC domain                                               | 23 | 21 |
| C-terminal region of MMR_HSR1 domain                     | 1  | 1  |
| MCMP-loop domain                                         | 5  | 5  |
| Ribosomal protein L7/L12 C-terminal domain               | 1  | 1  |
| NOG1 N-terminal helical domain                           | 1  | 1  |
| Tyrosyl-DNA phosphodiesterase                            | 1  | 1  |
| Fungal trichothecene efflux pump (TRI12)                 | 7  | 9  |
| Subunit 21 of Mediator complex                           | 1  | 1  |
| Fatty acid desaturase                                    | 13 | 13 |
| Eukaryotic translation initiation factor 2 alpha subunit | 1  | 1  |
| Origin recognition complex (ORC) subunit 4 C-terminus    | 1  | 1  |
| Domain of unknown function (DUF383)                      | 1  | 1  |
| Inhibitor of Apoptosis domain                            | 1  | 1  |
| Biotin-protein ligase, N-terminal                        | 1  | 1  |
| Acetyl-coenzyme A transporter 1                          | 1  | 1  |
| MOSC domain                                              | 11 | 11 |
| Bromodomain                                              | 9  | 11 |
| ENTH domain                                              | 3  | 3  |
| Probable N6-adenine methyltransferase                    | 1  | 1  |
| CRAL/TRIO domain                                         | 5  | 5  |
| Importin repeat 6                                        | 1  | 1  |
| Enolase C-terminal domain-like                           | 13 | 13 |
| Protein of unknown function (DUF3638)                    | 11 | 15 |
| Importin-beta N-terminal domain                          | 1  | 1  |
| Pyridoxal-phosphate dependent enzyme                     | 21 | 21 |
| Transglutaminase-like superfamily                        | 3  | 3  |
| eIF4-gamma/eIF5/eIF2-epsilon                             | 1  | 1  |
| Glycosyl hydrolase family 32 N-terminal domain           | 8  | 9  |

|                                                        |     |     |
|--------------------------------------------------------|-----|-----|
| Fes/CIP4,andEFC/F-BARhomologydomain                    | 1   | 1   |
| alpha/betahydrolasefold                                | 150 | 156 |
| Permeasefamily                                         | 5   | 5   |
| Glutathione-dependentformaldehyde-activatingenzyme     | 19  | 21  |
| CCR4-Notcomplexcomponent,Not1                          | 1   | 1   |
| Thiaminepyrophosphateenzyme,C-terminalTPPbindingdomain | 3   | 3   |
| Amidohydrolasefamily                                   | 35  | 33  |
| Na+dependentnucleosidetransporterC-terminus            | 1   | 1   |
| Condensationdomain                                     | 7   | 7   |
| Pleckstrinhomologydomain                               | 7   | 5   |
| Clr5domain                                             | 17  | 17  |
| Domainofunknownfunction(DUF3425)                       | 41  | 49  |
| Polynucleotidekinase3phosphatase                       | 1   | 1   |
| Zincfinger,C3HC4type(RINGfinger)                       | 11  | 11  |
| Molybdopterin-bindingdomainofaldehydedehydrogenase     | 3   | 3   |
| JmjCdomain,hydroxylase                                 | 5   | 5   |
| Glycerophosphoryldiesterphosphodiesterasefamily        | 5   | 5   |
| RNApolymeraseI-specifictranscription-initiationfactor  | 1   | 1   |
| Sec1family                                             | 1   | 1   |
| Helicaseassociateddomain(HA2)                          | 1   | 1   |
| KetopantoatereductasePanE/ApbA                         | 9   | 5   |
| VAD1AnalogofStAR-relatedlipidtransferdomain            | 3   | 3   |
| eRF1domain2                                            | 1   | 1   |
| LysMdomain                                             | 11  | 11  |
| NADPH-dependentFMNreductase                            | 7   | 7   |
| X-Prodipeptidyl-peptidase(S15family)                   | 15  | 15  |
| Aldo/ketoreductasefamily                               | 69  | 67  |
| Acyl-CoAdehydrogenase,N-terminaldomain                 | 1   | 1   |
| CrcB-likeprotein,CamphorResistance(CrcB)               | 1   | 1   |
| (2R)-phospho-3-sulfolactatesynthase(ComA)              | 1   | 1   |



|                                                                 |    |    |
|-----------------------------------------------------------------|----|----|
| RibonucleaseIII domain                                          | 3  | 3  |
| Transcription factor PAP1                                       | 1  | 1  |
| Piwi domain                                                     | 7  | 7  |
| Sodium/calcium exchanger protein                                | 15 | 17 |
| Prenyltransferase and squalene oxidase repeat                   | 3  | 3  |
| Hexokinase                                                      | 5  | 5  |
| S-adenosylmethionine synthetase, C-terminal domain              | 1  | 1  |
| AICARFT/IMPCHase bienzyme                                       | 1  | 1  |
| Questin oxidase-like                                            | 3  | 3  |
| Annexin                                                         | 3  | 3  |
| Oxidoreductase NAD-binding domain                               | 7  | 9  |
| CNH domain                                                      | 1  | 1  |
| NAC domain                                                      | 3  | 3  |
| Zinc-ribbon, C4HC2 type                                         | 1  | 1  |
| Transcription factor S-II (TFIIS)                               | 1  | 1  |
| Phosphoinositide 3-kinase family, accessory domain (PIK domain) | 1  | 1  |
| HCO3-transporter family                                         | 3  | 3  |
| Pre-PUA-like domain                                             | 1  | 1  |
| Dak1 domain                                                     | 9  | 7  |
| Cation transport protein                                        | 11 | 13 |
| Haemolysin-III related                                          | 3  | 3  |
| Invertebrate-AID/APOBEC-deaminase                               | 1  | 1  |
| Rab-GTPase-TBC domain                                           | 13 | 13 |
| Pyridine nucleotide-disulphide oxidoreductase                   | 47 | 53 |
| Transketolase, thiamine diphosphate binding domain              | 7  | 7  |
| Class-II DAHP synthetase family                                 | 1  | 1  |
| chorismate binding enzyme                                       | 1  | 1  |
| Amidase                                                         | 65 | 74 |
| Protein of unknown function (DUF917)                            | 3  | 3  |
| Cytoskeletal-regulatory complex EFhand                          | 5  | 5  |

|                                                                  |    |    |
|------------------------------------------------------------------|----|----|
| BRO1-like domain                                                 | 1  | 1  |
| Vesiculovirus phosphoprotein                                     | 1  | 1  |
| Histidine phosphatase superfamily (branch 1)                     | 17 | 17 |
| Possible lysine decarboxylase                                    | 3  | 3  |
| PAN domain                                                       | 20 | 20 |
| BOP1NT (NUC169) domain                                           | 1  | 1  |
| Putative nucleosome organisation protein                         | 1  | 1  |
| Pre-SET motif                                                    | 1  | 1  |
| PolyA polymerase head domain                                     | 1  | 1  |
| Fungal N-terminal domain of STAND proteins                       | 19 | 15 |
| RWD domain                                                       | 1  | 1  |
| Domain of unknown function (DUF1929)                             | 5  | 5  |
| Translation initiation factor SUI1                               | 5  | 5  |
| Flavin containing amine oxidoreductase                           | 56 | 56 |
| Phosphoribosyl transferase domain                                | 3  | 3  |
| Glycosyl hydrolase family 71                                     | 5  | 5  |
| 10TMAcyl transferase domain found in Cas1p                       | 1  | 1  |
| Poly-adenylate binding protein, unique domain                    | 1  | 1  |
| Electron transfer flavoprotein-ubiquinone oxidoreductase, 4Fe-4S | 1  | 1  |
| Thioredoxin-like domain                                          | 1  | 1  |
| Las1-like                                                        | 1  | 1  |
| mRNA capping enzyme                                              | 5  | 5  |
| Arrestin (or S-antigen), N-terminal domain                       | 3  | 3  |
| Transcription factor Tfb2                                        | 1  | 1  |
| DENN (AEX-3) domain                                              | 3  | 3  |
| Uncharacterized conserved protein (DUF2278)                      | 5  | 5  |
| Mannosidase Ig/CBM-like domain                                   | 3  | 3  |
| Dioxygenase                                                      | 41 | 43 |
| Hydantoinase B/oxoprolinase                                      | 3  | 3  |
| Leucyl-tRNA synthetase, Domain 2                                 | 1  | 1  |

|                                                     |     |     |
|-----------------------------------------------------|-----|-----|
| Adenylosuccinatesynthetase                          | 5   | 5   |
| SterolmethyltransferaseC-terminal                   | 1   | 1   |
| Methyltransferasedomain                             | 196 | 200 |
| tRNAsynthetaseclassIIcoredomain(G,H,P,SandT)        | 1   | 1   |
| VariantSH3domain                                    | 3   | 3   |
| PutativeGTPaseactivatingproteinforArf               | 9   | 9   |
| EsterasePHBdepolymerase                             | 1   | 1   |
| Prion-inhibitionandpropagation                      | 27  | 23  |
| Nicotinatephosphoribosyltransferase(NAPRTase)family | 1   | 1   |
| TCP-1/cpn60chaperoninfamily                         | 1   | 1   |
| Phosphotransferaseenzymeefamily                     | 47  | 49  |
| Alpha-L-fucosidase                                  | 3   | 3   |
| PhoD-likephosphatase                                | 5   | 5   |
| Enoyl-(Acylcarrierprotein)reductase                 | 104 | 122 |
| Maltoseacetyltransferase                            | 3   | 3   |
| Adaptorcomplexesmediumsubunitfamily                 | 1   | 1   |
| Gprotein-coupledglucosereceptorregulatingGpa2       | 5   | 5   |
| Cupin                                               | 47  | 45  |
| 2OG-Fe(II)oxygenasesuperfamily                      | 27  | 29  |
| Arylsulfotransferase(ASST)                          | 5   | 5   |
| tRNAsynthetasesclassI(I,L,MandV)                    | 1   | 1   |
| RAVEprotein1Cterminal                               | 1   | 1   |
| GTPase-activatorproteinforRas-likeGTPase            | 3   | 3   |
| Histidine-specificmethyltransferase,SAM-dependent   | 5   | 5   |
| DNAmismatchrepairproteinMlh1C-terminus              | 1   | 1   |
| Aflatoxinregulatoryprotein                          | 1   | 1   |
| Ceramidase                                          | 3   | 3   |
| AcyclicterpeneutilisationfamilyproteinAtuA          | 3   | 3   |
| Cupindomain                                         | 17  | 15  |
| Retinalpigmentepithelialmembraneprotein             | 21  | 21  |

|                                                             |    |    |
|-------------------------------------------------------------|----|----|
| Ionchannel                                                  | 5  | 5  |
| Peroxidase                                                  | 27 | 25 |
| SETdomain                                                   | 19 | 28 |
| Aminomethyltransferasefolate-bindingdomain                  | 3  | 3  |
| Lethalgiantlarvae(Lgl)like,C-terminal                       | 1  | 1  |
| Sec63Brldomain                                              | 3  | 3  |
| Proteasome-substrate-sizeregulator,midregion                | 1  | 1  |
| HECT-domain(ubiquitin-transferase)                          | 3  | 3  |
| Melibiose                                                   | 5  | 3  |
| Sugar-bindingN-terminaldomain                               | 3  | 3  |
| PCRFdomain                                                  | 1  | 1  |
| Peptidasedimerisationdomain                                 | 5  | 5  |
| Glycosylhydrolasefamily49N-terminalIg-likedomain            | 1  | 1  |
| ScavengerRNAdecappingenzyme(DcpS)N-terminal                 | 1  | 1  |
| GammatubulincomplexcomponentC-terminal                      | 1  | 1  |
| RIO1family                                                  | 3  | 3  |
| RPN1N-terminaldomain                                        | 1  | 1  |
| LrgB-likefamily                                             | 3  | 3  |
| Porphobilinogendeaminase,dipyromethanecofactorbindingdomain | 1  | 1  |
| SRP54-typeprotein,GTPasedomain                              | 1  | 1  |
| NUDIXdomain                                                 | 22 | 22 |
| Metallo-beta-lactamasesuperfamily                           | 31 | 31 |
| High-temperature-induceddauer-formationprotein              | 1  | 1  |
| Cupin-likedomain                                            | 11 | 11 |
| GATAzincfinger                                              | 19 | 19 |
| CyclinD1bindingdomain                                       | 1  | 1  |
| Pyruvatekinase,barreldomain                                 | 1  | 1  |
| AAAliddomain                                                | 3  | 3  |
| DASHcomplexsubunitSpc34                                     | 1  | 1  |
| Oligonucleotide/oligosaccharide-binding(OB)-fold            | 3  | 3  |

|                                                     |    |    |
|-----------------------------------------------------|----|----|
| NACHTdomain                                         | 57 | 53 |
| Commoncentraldomainoftyrosinase                     | 29 | 35 |
| Spb1C-terminaldomain                                | 1  | 1  |
| tRNAsynthetasesclassI(M)                            | 1  | 1  |
| FADlinkedoxidases,C-terminaldomain                  | 11 | 13 |
| Proteinofunknownfunction(DUF3723)                   | 13 | 15 |
| Ca <sup>2+</sup> insensitiveEFhand                  | 1  | 1  |
| G-patchdomain                                       | 3  | 3  |
| GlutathioneS-transferaseN-terminaldomain            | 3  | 3  |
| Aldolase/RraA                                       | 7  | 7  |
| Bacterialtandemrepeatdomain1                        | 1  | 1  |
| SPRYdomain                                          | 1  | 1  |
| AlphagalactosidaseA                                 | 3  | 3  |
| Oxysterol-bindingprotein                            | 5  | 5  |
| Phosphoenolpyruvatecarboxykinase                    | 1  | 1  |
| Glycosylhydrolasefamily67middledomain               | 5  | 5  |
| Proteintyrosinephosphatase-likeprotein,PTPLA        | 3  | 3  |
| Tti2family                                          | 1  | 1  |
| BacterialsignallingproteinNterminalrepeat           | 15 | 11 |
| CoA-transferasefamilyIII                            | 15 | 15 |
| UvrD-likehelicaseC-terminaldomain                   | 1  | 1  |
| Domainofunknownfunction(DUF2014)                    | 1  | 1  |
| STEliketranscriptionfactor                          | 1  | 1  |
| Glycosylhydrolasefamily3Nterminaldomain             | 7  | 7  |
| Dehydratasefamily                                   | 3  | 3  |
| Pyruvatephosphatedikinase,AMP/ATP-bindingdomain     | 1  | 1  |
| Domainofunknownfunction(DUF4743)                    | 1  | 1  |
| Calpainfamilycysteineprotease                       | 25 | 29 |
| Poly(A)polymerasecentraldomain                      | 1  | 1  |
| Zinc-fingerofnitricoxidesynthase-interactingprotein | 1  | 1  |

|                                               |    |    |
|-----------------------------------------------|----|----|
| Fungalysinmetallopeptidase(M36)               | 1  | 1  |
| Anaerobicribonucleoside-triphosphatereductase | 1  | 1  |
| Transketolase,pyrimidinebindingdomain         | 3  | 3  |
| Glycosyltransferasefamily28N-terminaldomain   | 25 | 23 |
| Bacterialtransferasehexapeptide(sixrepeats)   | 3  | 3  |
| Tannaseandferuloylsterase                     | 23 | 25 |
| Alpha-L-rhamnosidaseN-terminaldomain          | 1  | 1  |
| Domainofunknownfunction(DUF427)               | 1  | 1  |
| Alphaamylase,catalyticdomain                  | 11 | 7  |
| Domainofunknownfunction(DUF4470)              | 3  | 3  |
| FADbindingdomainofDNAphotolyase               | 1  | 1  |
| XPC-bindingdomain                             | 1  | 1  |
| ZincfingerC-x8-C-x5-C-x3-Htype(andsimilar)    | 9  | 9  |
| HelicaseC-terminaldomain                      | 1  | 1  |
| BRE1E3ubiquitinligase                         | 1  | 1  |
| Sulfotransferasedomain                        | 27 | 23 |
| Molybdopterinoxidoreductase                   | 3  | 3  |
| Mannosyltransferaseputative                   | 5  | 5  |
| MetallopeptidasefamilyM24                     | 7  | 7  |
| RadicalSAMsuperfamily                         | 1  | 1  |
| Glycosylhydrolasefamily30betasandwichdomain   | 1  | 1  |
| NB-ARCdomain                                  | 9  | 7  |
| fungalsTANDN-terminalGoodbyedomain            | 11 | 11 |
| FG-GAP-likerepeat                             | 3  | 3  |
| Uracilphosphoribosyltransferase               | 1  | 1  |
| Zn-fingerinRanbindingproteinandothers         | 1  | 1  |
| Cytochromeb5-likeHeme/Steroidbindingdomain    | 11 | 11 |
| Xrn1helicaldomain                             | 1  | 1  |
| Domainofunknownfunction(DUF4111)              | 1  | 1  |
| Domainofunknownfunction(DUF382)               | 1  | 1  |

|                                                        |    |    |
|--------------------------------------------------------|----|----|
| Arb2domain                                             | 1  | 1  |
| Membranemagnesiumtransporter                           | 1  | 1  |
| SLA1homologydomain1,SHD1                               | 1  | 1  |
| SnoaL-likepolyketidecyclase                            | 13 | 13 |
| Glycosylhydrolasesfamily35                             | 5  | 5  |
| Oxidoreductasefamily,C-terminalalpha/betadomain        | 3  | 3  |
| EamA-liketransporterfamily                             | 1  | 1  |
| Dyneinassociatedprotein                                | 1  | 1  |
| Animalhaemperoxidase                                   | 7  | 9  |
| Glycosylhydrolasefamily115                             | 3  | 3  |
| Prp19/Pso4-like                                        | 1  | 1  |
| Thiaminepyrophosphateenzyme,N-terminalTPPbindingdomain | 23 | 23 |
| GlyoxaloxidaseN-terminus                               | 1  | 1  |
| Eukaryotic-typecarbonicanhydrase                       | 5  | 5  |
| DomainofUnknownFunction(DUF913)                        | 1  | 1  |
| Domainofunknownfunction(DUF1771)                       | 1  | 1  |
| Insulinase(PeptidasefamilyM16)                         | 3  | 1  |
| TypeI3-dehydroquinase                                  | 1  | 1  |
| Shikimatedehydrogenasesubstratebindingdomain           | 1  | 1  |
| Phospholipid-translocatingP-typeATPaseC-terminal       | 1  | 1  |
| Nsp1-likeC-terminalregion                              | 1  | 1  |
| 14-3-3protein                                          | 7  | 7  |
| GETcomplexsubunitGET2                                  | 1  | 1  |
| Transmembraneaminoacidtransporterprotein               | 31 | 29 |
| Glycosylhydrolasesfamily15                             | 1  | 1  |
| Proteinofunknownfunction(DUF974)                       | 1  | 1  |
| IBRdomain,ahalfRING-fingerdomain                       | 11 | 11 |
| Alanineracemase,N-terminaldomain                       | 3  | 1  |
| Aspartylprotease                                       | 1  | 1  |
| ATP-graspN-terminaldomain                              | 1  | 1  |

|                                                   |    |    |
|---------------------------------------------------|----|----|
| GDP-mannose4,6dehydratase                         | 5  | 3  |
| Proteasomesubunit                                 | 7  | 7  |
| Domainofunknownfunction(DUF1993)                  | 5  | 5  |
| Aminoacidkinasefamily                             | 3  | 3  |
| UbiAprenyltransferasefamily                       | 3  | 3  |
| Serineaminopeptidase,S33                          | 23 | 23 |
| Serinedehydratasealphachain                       | 1  | 1  |
| TaurinecatabolismdioxygenaseTauD,TfdAfamily       | 15 | 16 |
| PeptidasefamilyM13                                | 3  | 3  |
| CVNHdomain                                        | 1  | 1  |
| Arrestin(orS-antigen),C-terminaldomain            | 7  | 7  |
| MCMAAA-liddomain                                  | 1  | 1  |
| ScaffoldproteinNfu/NifUNterminal                  | 1  | 0  |
| Dihydrouridinesynthase(Dus)                       | 5  | 5  |
| Anaphase-promotingcomplexsubunit4WD40domain       | 1  | 1  |
| ErgosterolbiosynthesisERG4/ERG24family            | 9  | 9  |
| SAMdomain(Sterilealphamotif)                      | 1  | 1  |
| Sulfatase                                         | 23 | 21 |
| Proteinofunknownfunction(DUF933)                  | 1  | 1  |
| Bacterialalpha-L-rhamnosidaseC-terminaldomain     | 1  | 1  |
| CentromerekinetochorecomponentCENP-Thistonefold   | 5  | 5  |
| Fusaricacidresistanceprotein-like                 | 1  | 1  |
| 6-phosphogluconatedehydrogenase,C-terminaldomain  | 3  | 3  |
| PULdomain                                         | 1  | 1  |
| GTPcyclohydrolaseNterminal                        | 1  | 1  |
| Enoyl-CoAhydratase/isomerase                      | 17 | 19 |
| WWdomain                                          | 9  | 9  |
| Uncharacterizedalpha/betahydrolasedomain(DUF2235) | 19 | 17 |
| ATPsynthasesubunitC                               | 1  | 1  |
| Ribonuclease2-5A                                  | 1  | 1  |



|                                               |    |    |
|-----------------------------------------------|----|----|
| GlucosidaseIIbetasubunit-likeprotein          | 1  | 1  |
| Proteinofunknownfunction(DUF3445)             | 3  | 5  |
| VHSdomain                                     | 3  | 3  |
| Ribosomebiogenesisprotein,C-terminal          | 1  | 1  |
| RanBP1domain                                  | 3  | 3  |
| Ig-like domainfromnexttoBRCA1gene             | 1  | 1  |
| MannitoldehydrogenaseC-terminaldomain         | 1  | 1  |
| Eukaryoticaspartylprotease                    | 30 | 30 |
| Asp/Glu/Hydantoinracemase                     | 11 | 9  |
| Peroxidase,family2                            | 13 | 11 |
| NAD(P)-bindingRossmann-like domain            | 21 | 27 |
| tRNAsynthetasesclassII(A)                     | 1  | 1  |
| Glycosidehydrolasefamily2C-terminaldomain5    | 1  | 1  |
| CoatmerWDassociatedregion                     | 1  | 1  |
| PLU-1-likeprotein                             | 1  | 1  |
| Proteinofunknownfunction(DUF3292)             | 1  | 1  |
| Candidaagglutinin-like(ALS)                   | 3  | 1  |
| NAD(P)H-binding                               | 46 | 49 |
| KetopantoatereductasePanE/ApbACterminal       | 5  | 3  |
| Glycosylhydrolasefamily79C-terminalbetadomain | 5  | 5  |
| NYNdomain                                     | 5  | 5  |
| Cid1familypolyApolymerase                     | 1  | 1  |
| Proteinofunknownfunction(DUF1593)             | 9  | 11 |
| HomeoboxKNdomain                              | 11 | 11 |
| Pectinesterase                                | 8  | 8  |
| EVE domain                                    | 1  | 1  |
| MoaFC-terminaldomain                          | 1  | 1  |
| NDT80/PhoGlikeDNA-bindingfamily               | 7  | 7  |
| PeptidaseA4family                             | 5  | 5  |
| ATP-graspdomain                               | 1  | 1  |

|                                                               |    |     |
|---------------------------------------------------------------|----|-----|
| Pyridoxal-dependentdecarboxylase,pyridoxalbindingdomain       | 3  | 3   |
| DSHCT(NUC185)domain                                           | 1  | 1   |
| Iron/zincpurpleacidphosphatase-likeproteinC                   | 1  | 1   |
| Glycosyltransferasefamilygroup2                               | 5  | 7   |
| Glycosylhydrolasefamily59                                     | 1  | 1   |
| TransportproteinAvl9                                          | 1  | 1   |
| Domainofunknownfunction(DUF4419)                              | 5  | 5   |
| Ninonebinding(NOB1)Zn-ribbonlike                              | 1  | 1   |
| Cyclophilintypepeptidyl-prolylcis-transisomerase/CLD          | 9  | 9   |
| ACTdomain                                                     | 1  | 1   |
| lactate/malatedehydrogenase,NADbindingdomain                  | 3  | 3   |
| Glycosyltransferasesgroup1                                    | 9  | 9   |
| NADdependentepimerase/dehydratasefamily                       | 58 | 60  |
| Amidohydrolase                                                | 57 | 53  |
| 3-hydroxyacyl-CoAdehydrogenase,NADbindingdomain               | 3  | 5   |
| ThreoninesynthaseNterminus                                    | 1  | 1   |
| Dienelactonehydrolasefamily                                   | 27 | 27  |
| RAMsignallingpathwayprotein                                   | 1  | 1   |
| MembraneboundO-acyltransferasefamily                          | 3  | 1   |
| DHHA2domain                                                   | 1  | 1   |
| hATfamilyC-terminaldimerisationregion                         | 94 | 496 |
| Glycosylhydrolasesfamily28                                    | 21 | 19  |
| Metallo-peptidasefamilyM12                                    | 1  | 1   |
| FattyacidsynthasesubunitalphaAcylcarrierdomain                | 1  | 1   |
| SRF-typetranscriptionfactor(DNA-bindinganddimerisationdomain) | 9  | 15  |
| Thiolase,C-terminaldomain                                     | 1  | 1   |
| CoenzymeAtransferase                                          | 3  | 1   |
| THOcomplexsubunit2N-terminus                                  | 1  | 1   |
| EZH2N-terminaldomain                                          | 3  | 3   |
| Seedmaturationprotein                                         | 1  | 1   |

|                                                              |    |    |
|--------------------------------------------------------------|----|----|
| Cationeffluxfamily                                           | 9  | 9  |
| X-Prodipeptidyl-peptidaseC-terminalnon-catalyticdomain       | 3  | 3  |
| Tetrahydrofolatedehydrogenase/cyclohydrolase,catalyticdomain | 1  | 1  |
| GlycinecleavagesystemP-protein                               | 1  | 1  |
| Pyoverdine/dityrosinebiosynthesisprotein                     | 1  | 1  |
| Glycosyltransferasesugar-bindingregioncontainingDXDmotif     | 5  | 5  |
| Tyrosinephosphatasefamily                                    | 3  | 3  |
| mRNACappingenzyme,catalyticdomain                            | 1  | 1  |
| Telomeraseribonucleoproteincomplex-RNAbindingdomain          | 1  | 1  |
| S-adenosyl-L-homocysteinehydrolase,NADbindingdomain          | 1  | 1  |
| RibonucleaseT2family                                         | 3  | 3  |
| EPSPsynthase(3-phosphoshikimate1-carboxyvinyltransferase)    | 1  | 1  |
| Carbohydrateesterase2N-terminal                              | 1  | 1  |
| Glutamate/Leucine/Phenylalanine/Valinedehydrogenase          | 3  | 5  |
| ERCC3/RAD25/XPBC-terminalhelicase                            | 1  | 1  |
| HNHendonuclease                                              | 25 | 31 |
| GLEYAdomain                                                  | 5  | 7  |
| RecQzinc-binding                                             | 3  | 0  |
| LicDfamily                                                   | 1  | 1  |
| ANTHdomain                                                   | 1  | 1  |
| TAP-likeprotein                                              | 3  | 3  |
| Frequencyclockprotein                                        | 17 | 17 |
| Proteinofunknownfunction(DUF4246)                            | 11 | 9  |
| SIR2-likedomain                                              | 1  | 1  |
| Pyridoxamine5'-phosphateoxidase                              | 7  | 7  |
| haloaciddehalogenase-likehydrolase                           | 3  | 3  |
| Acyltransferasedomain                                        | 3  | 1  |
| Poly(ADP-ribose)polymerase,regulatorydomain                  | 3  | 3  |
| Glycosylhydrolasesfamily6                                    | 1  | 1  |
| NuclearporeproteinNUP188C-terminaldomain                     | 1  | 1  |

|                                                 |    |    |
|-------------------------------------------------|----|----|
| Indole-3-glycerolphosphatesynthase              | 1  | 1  |
| Apg6BARAdomain                                  | 1  | 1  |
| Integrasecoredomain                             | 1  | 1  |
| Glycosylhydrolasefamily76                       | 13 | 13 |
| PAP2superfamily                                 | 15 | 13 |
| Polyketidesynthasedehydratase                   | 1  | 3  |
| OTT_1508-likedeaminase                          | 25 | 25 |
| FAD-bindingdomain                               | 3  | 7  |
| Iron-containingalcoholdehydrogenase             | 19 | 21 |
| SesBdomainonfungaldeath-pathwayprotein          | 1  | 1  |
| Dihydrodipicolinatesynthetasefamily             | 13 | 11 |
| Glycosylhydrolasefamily65,N-terminaldomain      | 5  | 5  |
| Uncharacterisedproteinfamily(UPF0183)           | 1  | 1  |
| Formate/nitritetransporter                      | 3  | 3  |
| Chromatetransporter                             | 5  | 5  |
| Phagelysozyme                                   | 3  | 5  |
| Caleosinrelatedprotein                          | 5  | 5  |
| Glycosylhydrolasefamily1                        | 35 | 35 |
| RasGEFdomain                                    | 1  | 1  |
| Putativeserinedehydratasedomain                 | 1  | 1  |
| Proteinofunknownfunction(DUF3659)               | 5  | 5  |
| Squalene-hopenecyclaseN-terminaldomain          | 1  | 1  |
| MmgE/PrpDC-terminaldomain                       | 1  | 1  |
| tRNAsynthetasesclassI(R)                        | 1  | 1  |
| Mis12-Mtw1proteinfamily                         | 13 | 13 |
| Pirin                                           | 3  | 3  |
| Orsellinicacid/F9775biosynthesisclusterproteinD | 33 | 79 |
| Zinccarboxypeptidase                            | 11 | 11 |
| SRR1                                            | 5  | 5  |
| Clathrinadaptorcomplexsmallchain                | 1  | 1  |

|                                                        |    |    |
|--------------------------------------------------------|----|----|
| SHNi-TPR                                               | 1  | 1  |
| Zinc-bindingdomain                                     | 1  | 1  |
| Transmembraneproteins14C                               | 3  | 3  |
| 3-betahydroxysteroiddehydrogenase/isomerasefamily      | 11 | 9  |
| Secretorylipase                                        | 7  | 7  |
| Proteinofunknownfunction(DUF4238)                      | 3  | 5  |
| SMP-30/Gluconolactonase/LRE-likeregion                 | 11 | 11 |
| BTB/POZdomain                                          | 40 | 38 |
| Cyclin-dependentkinaseregulatorysubunit                | 1  | 1  |
| CPSFAsubunitregion                                     | 3  | 3  |
| Phytanoyl-CoAdioxygenase(PhyH)                         | 20 | 20 |
| Domainofunknownfunction(DUF4345)                       | 3  | 3  |
| Kinesinmotordomain                                     | 5  | 5  |
| Cysteine-richTMmodulestresstolerance                   | 1  | 1  |
| Proteinofunknownfunction(DUF3759)                      | 1  | 1  |
| Amino-transferaseclassIV                               | 13 | 15 |
| Alcoholacetyltransferase                               | 11 | 11 |
| YCII-relateddomain                                     | 5  | 5  |
| SAMdependentcarboxylmethyltransferase                  | 5  | 5  |
| Aromaticaminoacidlyase                                 | 3  | 3  |
| Lipocalin-likedomain                                   | 1  | 1  |
| 2EXRfamily                                             | 46 | 49 |
| EpoxidehydrolaseNterminus                              | 11 | 13 |
| Isoprenylcysteinocarboxylmethyltransferase(ICMT)family | 7  | 5  |
| Majorintrinsicprotein                                  | 11 | 11 |
| Nucleotide-diphospho-sugartransferase                  | 3  | 3  |
| Acetyltransferase(GNAT)family                          | 45 | 43 |
| IncreasedlossofmitochondrialDNAprotein1                | 1  | 1  |
| EthDdomain                                             | 13 | 15 |
| ChrRCupin-likedomain                                   | 5  | 5  |

|                                                       |    |    |
|-------------------------------------------------------|----|----|
| Lactonase,7-bladedbeta-propeller                      | 7  | 9  |
| MycotoxinbiosynthesisproteinUstYa                     | 3  | 3  |
| Polyketidecyclase/dehydraseandlipidtransport          | 8  | 10 |
| Indoleamine2,3-dioxygenase                            | 7  | 7  |
| NUBPLiron-transferP-loopNTPase                        | 1  | 1  |
| Basicregionleucinezipper                              | 7  | 11 |
| Proteintyrosineandserine/threoninekinase              | 3  | 1  |
| Proteinofunknownfunction(DUF3455)                     | 7  | 11 |
| Ubiquinol-cytochromeCreductasecomplex14kDsubunit      | 1  | 1  |
| Hsp20/alphacrystallinfamily                           | 7  | 9  |
| Up-regulatedDuringSeptation                           | 13 | 13 |
| Lipase(class3)                                        | 5  | 5  |
| Glycosylhydrolasesfamily16                            | 49 | 61 |
| Uncharacterizedproteinconservedinbacteria(DUF2263)    | 5  | 5  |
| Aldose1-epimerase                                     | 1  | 1  |
| CorA-likeMg2+transporterprotein                       | 9  | 5  |
| GDSL-likeLipase/Acylhydrolase                         | 39 | 39 |
| Pro-kumamolisin,activationdomain                      | 5  | 5  |
| Cytidineanddeoxycytidylatedeaminasezinc-bindingregion | 1  | 1  |
| Necrosisinducingprotein(NPP1)                         | 5  | 7  |
| Proteinofunknownfunction(DUF2439)                     | 1  | 1  |
| EndoribonucleaseL-PSP                                 | 21 | 21 |
| BRCTdomain,aBRCA1C-terminusdomain                     | 1  | 1  |
| FungalTransformingacidicoiled-coil(TACC)proteins      | 1  | 1  |
| Yip1domain                                            | 1  | 1  |
| Bacterialphospho-glucoseisomeraseC-terminalSISdomain  | 1  | 1  |
| Acetyltransferase(GNAT)domain                         | 27 | 27 |
| Metal-independentalpha-mannosidase(GH125)             | 3  | 3  |
| Transferasefamily                                     | 24 | 24 |
| alpha-L-rhamnosidase                                  | 41 | 41 |

|                                                 |    |    |
|-------------------------------------------------|----|----|
| Haem-containingdehydratase                      | 7  | 7  |
| F-boxdomain                                     | 21 | 23 |
| Iontransportprotein                             | 1  | 1  |
| S1/P1Nuclease                                   | 1  | 1  |
| Glycosyltransferasefamily8                      | 9  | 9  |
| O-methyltransferasedomain                       | 21 | 27 |
| GDP/GTPexchange factorSec2p                     | 1  | 1  |
| 3-hydroxyacyl-CoAdehydrogenase,C-terminaldomain | 1  | 1  |
| Trichodienesynthase(TRI5)                       | 1  | 1  |
| Proteinofunknownfunction(DUF1349)               | 3  | 3  |
| Phosphoglyceratekinase                          | 1  | 1  |
| HpcH/HpaIaldolase/citratelasefamily             | 19 | 15 |
| Serinecarboxypeptidase                          | 24 | 24 |
| Histidinoldehydrogenase                         | 1  | 1  |
| TctoxincomplexTcAC-terminalTcB-bindingdomain    | 1  | 1  |
| galactosyltransferaseGMA12/MNN10family          | 5  | 5  |
| Sir2family                                      | 3  | 3  |
| YetA-likeprotein                                | 1  | 1  |
| Eukaryoticproteinofunknownfunction(DUF829)      | 5  | 5  |
| OrganicsolutetransporterOstalpha                | 3  | 3  |
| F-box-like                                      | 31 | 31 |
| Prolinedehydrogenase                            | 3  | 3  |
| Predictedmembraneprotein(DUF2306)               | 5  | 5  |
| Phosphoenolpyruvatephosphomutase                | 5  | 5  |
| Porphyromonas-typepeptidyl-argininedeiminase    | 3  | 3  |
| Proteinofunknownfunction(DUF2456)               | 1  | 1  |
| Ecdysteroidkinase-likefamily                    | 11 | 11 |
| KinetochoreSim4complexsubunitFTA2               | 10 | 11 |
| Lysinemethyltransferase                         | 3  | 3  |
| Glycosyltransferaselikefamily2                  | 5  | 5  |

|                                                     |    |    |
|-----------------------------------------------------|----|----|
| StressresponsiveA/BBarrelDomain                     | 5  | 5  |
| homogentisate1,2-dioxygenase                        | 3  | 3  |
| Cys/MetmetabolismPLP-dependentenzyme                | 19 | 19 |
| Terpenesynthasefamily2,C-terminalmetalbinding       | 11 | 13 |
| Fungalproteinkinase                                 | 5  | 5  |
| Cupinsuperfamily(DUF985)                            | 3  | 3  |
| Dihydroorotatedehydrogenase                         | 1  | 1  |
| DomainofUnknownFunction(DUF1907)                    | 3  | 3  |
| HDdomain                                            | 9  | 11 |
| Haloaciddehalogenase-likehydrolase                  | 15 | 15 |
| Glycosidehydrolase131catalyticN-terminaldomain      | 1  | 1  |
| Thioesterase-likesuperfamily                        | 15 | 15 |
| Glycosylhydrolasesfamily39                          | 3  | 3  |
| MeioticcellcortexC-terminalpleckstrinhomology       | 1  | 1  |
| GlycosylHydrolaseFamily88                           | 3  | 5  |
| Lysophospholipasecatalyticdomain                    | 5  | 5  |
| Domainofunknownfunction(DUF1989)                    | 3  | 1  |
| Autophagocytosisassociatedprotein,active-sitedomain | 5  | 4  |
| SMI1/KNR4family(SUKH-1)                             | 3  | 3  |
| ADP-ribosylglycohydrolase                           | 7  | 7  |
| EsteraseFrsA-like                                   | 5  | 3  |
| bZIPtranscriptionfactor                             | 27 | 30 |
| Mating-typeproteinMATalpha1HMG-box                  | 1  | 1  |
| Domainofunknownfunction(DUF1338)                    | 9  | 9  |
| Matingtypeprotein1-1-2ofunknownfunction             | 1  | 1  |
| Proteinofunknownfunction(DUF1479)                   | 11 | 9  |
| ATPsynthasesubunitD                                 | 1  | 1  |
| HMG(highmobilitygroup)box                           | 5  | 5  |
| GDA1/CD39(nucleosidephosphatase)family              | 1  | 1  |
| ER-GolgitraffickingTRAPPIcomplex85kDasubunit        | 1  | 1  |



|                                                 |     |     |
|-------------------------------------------------|-----|-----|
| XPGdomaincontaining                             | 1   | 1   |
| Ubiquitin3bindingproteinBut2C-terminaldomain    | 5   | 5   |
| CytochromecoxidasesubunitVIa                    | 1   | 1   |
| Phenazinebiosynthesis-likeprotein               | 7   | 7   |
| Glycosylhydrolasefamily12                       | 11  | 11  |
| Helix-loop-helixDNA-bindingdomain               | 15  | 15  |
| Sodium:solutesymporterfamily                    | 3   | 3   |
| Rhamnogalacturonanlyasesbeta-sheetdomain        | 1   | 1   |
| Alginatelyase                                   | 5   | 5   |
| Hypotheticalmethyltransferase                   | 1   | 1   |
| PredictedAdoMet-dependentmethyltransferase      | 1   | 1   |
| pfkBfamilycarbohydratekinase                    | 3   | 3   |
| ChorismatemutasetypeII                          | 1   | 1   |
| Fungalproteinofunknownfunction(DUF1752)         | 19  | 19  |
| Rhodanese-likedomain                            | 5   | 5   |
| SodiumBileacidsymporterfamily                   | 5   | 5   |
| Naturalresistance-associatedmacrophageprotein   | 5   | 5   |
| NUDEprotein,C-terminalconservedregion           | 1   | 1   |
| Dynactinp62family                               | 1   | 1   |
| Bacterialproteinofunknownfunction(DUF924)       | 3   | 3   |
| TranscriptionfactorIIA,alpha/betasubunit        | 1   | 1   |
| Hypoxiainducedproteinconservedregion            | 3   | 3   |
| DNApolymeraseLigase(LigD)                       | 1   | 1   |
| UDP-glucuronosylandUDP-glucosyltransferase      | 7   | 7   |
| Ankyrinrepeat                                   | 245 | 223 |
| Trypsin                                         | 7   | 7   |
| Proteinofunknownfunction(DUF3632)               | 5   | 5   |
| Pyridoxal-dependentdecarboxylaseconserveddomain | 11  | 11  |
| Forkheaddomain                                  | 1   | 1   |
| CoenzymeQ(ubiquinone)biosynthesisproteinCoq4    | 1   | 1   |

|                                            |    |    |
|--------------------------------------------|----|----|
| Transaldolase/Fructose-6-phosphatealdolase | 7  | 7  |
| Proteinofunknownfunction(DUF1688)          | 1  | 1  |
| Acetoacetatedecarboxylase(ADC)             | 8  | 8  |
| DJ-1/PfpIfamily                            | 14 | 14 |
| SaccharopinedehydrogenaseNADPbindingdomain | 5  | 5  |
| Astacin(PeptidasefamilyM12A)               | 5  | 7  |
| Caspasedomain                              | 11 | 11 |
| Rasfamily                                  | 21 | 21 |
| Bacteriorhodopsin-likeprotein              | 15 | 19 |
| Fungalfruitbodylectin                      | 1  | 1  |
| Proteinofunknownfunction(DUF3237)          | 11 | 11 |
| CFEMdomain                                 | 23 | 25 |
| RibDC-terminaldomain                       | 1  | 1  |
| Antibioticbiosynthesismonooxygenase        | 7  | 7  |
| Glycosyltransferasefamily90                | 7  | 7  |
| Peroxisomalbiogenesisfactor11(PEX11)       | 3  | 3  |
| Alpha/betahydrolasedomain                  | 1  | 0  |
| Thioesterasesuperfamily                    | 9  | 7  |
| MAPEGfamily                                | 7  | 5  |
| Tryptophandimethylallyltransferase         | 7  | 5  |
| Phosphoesterasefamily                      | 3  | 1  |
| PP-loopfamily                              | 1  | 1  |
| Pex2/Pex12aminoterminalregion              | 1  | 1  |
| vonWillebrandfactortypeAdomain             | 3  | 7  |
| Serinehydrolase(FSH1)                      | 3  | 3  |
| LITAF-likezincribbondomain                 | 11 | 11 |
| Domainofunknownfunction(DUF1772)           | 3  | 3  |
| Proteinofunknownfunction(DUF2985)          | 3  | 3  |
| WD40-likeBetaPropellerRepeat               | 1  | 1  |
| Ferritin-likedomain                        | 3  | 5  |

|                                                  |    |    |
|--------------------------------------------------|----|----|
| Familyofunknownfunction(DUF5519)                 | 3  | 3  |
| ClassIIAldolaseandAdducinN-terminaldomain        | 5  | 5  |
| HPC2andubicleindomain                            | 1  | 1  |
| Golgi phosphoprotein3(GPP34)                     | 1  | 1  |
| Zincfingerprotein                                | 1  | 1  |
| CASC3/BarentszeIF4AIIIbinding                    | 1  | 1  |
| Familyofunknownfunction(DUF6060)                 | 2  | 1  |
| Proteinofunknownfunction(DUF3176)                | 9  | 9  |
| Ribose/GalactoseIsomerase                        | 3  | 3  |
| FtsJ-likemethyltransferase                       | 5  | 5  |
| Isochorismatasefamily                            | 11 | 11 |
| MCRAfamily                                       | 1  | 3  |
| PeptidasefamilyM3                                | 3  | 3  |
| Purinenucleosidepermease(NUP)                    | 1  | 1  |
| Cysteine-richsecretoryproteinfamily              | 15 | 19 |
| FAR-17a/AIG1-likeprotein                         | 1  | 1  |
| Putativecyclase                                  | 11 | 11 |
| Domainofunknownfunction(DUF4267)                 | 11 | 9  |
| Telomeric single stranded DNA binding POT1/CDC13 | 1  | 1  |
| Ribosomal protein S14p/S29e                      | 3  | 3  |
| Beta-eliminatinglyase                            | 1  | 1  |
| Egh16-likevirulencefactor                        | 9  | 7  |
| TM2domain                                        | 1  | 3  |
| Glycosyltransferasefamily64domain                | 3  | 3  |
| hTAFII28-likeprotein conserved region            | 1  | 1  |
| GTPcyclohydrolaseI                               | 1  | 1  |
| Transientreceptorpotential(TRP)ionchannel        | 1  | 1  |
| Glycine-richdomain-containingprotein-like        | 1  | 1  |
| RING-variantdomain                               | 1  | 1  |
| Alpha-L-arabinofuranosidaseC-terminaldomain      | 5  | 5  |

|                                                 |    |     |
|-------------------------------------------------|----|-----|
| Stc1domain                                      | 1  | 1   |
| Rhomboidfamily                                  | 3  | 3   |
| Luciferase-likemonooxygenase                    | 5  | 5   |
| Ham1family                                      | 1  | 1   |
| ProteinHRI1                                     | 1  | 1   |
| ECL1/2/3zincbindingproteins                     | 5  | 7   |
| K+potassiumtransporter                          | 5  | 3   |
| Arginosuccinatesynthase                         | 3  | 3   |
| Choline/ethanolaminekinase                      | 3  | 3   |
| Flavoprotein                                    | 7  | 7   |
| HrpE/YscL/FliHandV-typeATPasesubunitE           | 1  | 1   |
| Vacuolarproteinorting-associatedprotein62       | 1  | 1   |
| Transposase                                     | 73 | 104 |
| U3-containing90Spre-ribosomalcomplexsubunit     | 1  | 1   |
| Cryptococcalmannosyltransferase1                | 9  | 9   |
| Pathogeneffector                                | 3  | 3   |
| Las17-bindingproteinactinregulator              | 5  | 7   |
| Competence-damagedprotein                       | 1  | 1   |
| 2'-5'RNAligasesuperfamily                       | 1  | 1   |
| Flavinreductaselikedomain                       | 5  | 5   |
| Meioticallyup-regulatedgenefamily               | 5  | 13  |
| Sybindin-likefamily                             | 3  | 3   |
| Phosphatetransporterfamily                      | 5  | 5   |
| LanthioninesynthetaseC-likeprotein              | 1  | 1   |
| Matrixin                                        | 1  | 1   |
| Phosphatidylglycerollysyltransferase,C-terminal | 1  | 1   |
| Glutamineamidotransferasesclass-II              | 1  | 1   |
| Hypotheticalglycosylhydrolase6                  | 3  | 3   |
| RQCdomain                                       | 1  | 1   |
| GINScomplexprotein                              | 3  | 3   |

|                                                                              |    |    |
|------------------------------------------------------------------------------|----|----|
| Gamma-glutamylcyclotransferase,AIG2-like                                     | 6  | 6  |
| Citrate synthase,C-terminal domain                                           | 1  | 1  |
| Glycosylhydrolase catalytic core                                             | 3  | 3  |
| HicA toxin of bacterial toxin-antitoxin, Family of unknown function(DUF5695) | 1  | 1  |
| Spt20 family                                                                 | 3  | 3  |
| RNA dependent RNA polymerase                                                 | 1  | 1  |
| AFG1-like ATPase                                                             | 9  | 11 |
| Lipoxygenase                                                                 | 1  | 1  |
| Sodium/hydrogen exchanger family                                             | 3  | 3  |
| Activator of mitotic machinery Cdc14 phosphatase activation C-term           | 9  | 15 |
| RPA43 OB domain in RNA Pol II                                                | 1  | 1  |
| Heme oxygenase                                                               | 1  | 1  |
| Right handed beta helix region                                               | 1  | 1  |
| Putative amidoligase enzyme                                                  | 3  | 3  |
| Tuberculosis necrotizing toxin                                               | 5  | 5  |
| Acyltransferase family                                                       | 1  | 1  |
| Ion channel regulatory protein UNC-93                                        | 3  | 3  |
| Domain of unknown function(DUF4385)                                          | 3  | 3  |
| Alpha-galactosyl-binding fung allectin                                       | 1  | 1  |
| Nucleoporin autopeptidase                                                    | 1  | 1  |
| Spherulation-specific family4                                                | 1  | 1  |
| Glycoside-hydrolase family GH114                                             | 3  | 3  |
| Domain of unknown function(DUF5703)                                          | 3  | 3  |
| Protein-arginine deiminase(PAD)                                              | 1  | 1  |
| Exonuclease                                                                  | 9  | 9  |
| Peptidase family S41                                                         | 15 | 15 |
| Reactive mitochondrial oxygen species modulator1                             | 1  | 1  |
| Beta-1,3-glucanase                                                           | 1  | 1  |
| TENA/THI-4/PQQC family                                                       | 13 | 17 |
|                                                                              | 1  | 1  |

|                                                 |    |    |
|-------------------------------------------------|----|----|
| C-terminaldomainof1-Cysperoxidoredoxin          | 1  | 1  |
| Glycosylhydrolasefamily53                       | 3  | 3  |
| Deuterolysinmetalloprotease(M35)family          | 1  | 1  |
| Glutaredoxin                                    | 3  | 3  |
| Bacterialextracellularsolute-bindingprotein     | 3  | 5  |
| G-proteinalphasubunit                           | 7  | 7  |
| Arrestin_Nterminallike                          | 3  | 3  |
| Pregnancy-associatedplasma protein-A            | 3  | 3  |
| ExpansinC-terminaldomain                        | 1  | 1  |
| CysteinedioxygenasetypeI                        | 1  | 1  |
| Scytalonedehydratase                            | 1  | 3  |
| Hsp70protein                                    | 19 | 19 |
| Phenolicaciddecarboxylase(PAD)                  | 1  | 1  |
| Glucose-repressibleproteinGrg1                  | 3  | 3  |
| Mpv17/PMP22family                               | 7  | 7  |
| 3-octaprenyl-4-hydroxybenzoatecarboxy-lyase     | 9  | 9  |
| Cytochromec                                     | 15 | 15 |
| Fic/DOCfamily                                   | 9  | 9  |
| CopperfistDNA bindingdomain                     | 1  | 1  |
| VITfamily                                       | 1  | 1  |
| EXPERA(EXPandedEBPsuperfamily)                  | 5  | 5  |
| Carboxymuconolactonedecarboxylasefamily         | 11 | 11 |
| Putativelumazine-binding                        | 3  | 1  |
| Glycosyltransferasefamily2                      | 33 | 29 |
| Erg28likeprotein                                | 1  | 1  |
| Ulp1proteasefamily,C-terminalcatalyticdomain    | 11 | 15 |
| Domainofunknownfunction(DUF4451)                | 5  | 5  |
| Translocon-associatedprotein(TRAP),alphasubunit | 1  | 1  |
| Est1DNA/RNA bindingdomain                       | 5  | 13 |
| Tubulin-tyrosineligasefamily                    | 3  | 3  |

|                                                              |    |    |
|--------------------------------------------------------------|----|----|
| Creatinase/ProlidaseN-terminaldomain                         | 1  | 1  |
| HeterokaryonincompatibilityproteinHet-C                      | 3  | 3  |
| Thiolase-likeproteintype1additionalC-terminaldomain          | 1  | 1  |
| 50Sribosome-bindingGTPase                                    | 5  | 5  |
| Proteinofunknownfunction(DUF3533)                            | 7  | 7  |
| Putativeesterase                                             | 5  | 5  |
| Uncharacterizedproteinconservedinbacteria(DUF2264)           | 1  | 1  |
| Carbohydratebindingdomain                                    | 1  | 3  |
| Beta-L-arabinofuranosidase,GH127                             | 5  | 5  |
| Fungalcellulosebindingdomain                                 | 3  | 3  |
| Xyloseisomerase-likeTIMbarrel                                | 5  | 9  |
| D-arabinono-1,4-lactoneoxidase                               | 1  | 1  |
| Alternativeoxidase                                           | 1  | 1  |
| PHPdomain                                                    | 1  | 1  |
| Erv1/Alrfamily                                               | 1  | 1  |
| Familyofunknownfunction(DUF6055)                             | 1  | 1  |
| Hydroxymethylglutaryl-coenzymeAreductase                     | 7  | 15 |
| Glycosyltransferasefamily17                                  | 3  | 3  |
| SNF5/SMARCB1/INI1                                            | 3  | 3  |
| Phosphatidylserinedecarboxylase                              | 7  | 11 |
| NMT1-likefamily                                              | 1  | 1  |
| PKDdomain                                                    | 1  | 1  |
| Caulimovirusviroplasmin                                      | 1  | 1  |
| Proteinofunknownfunction(DUF2722)                            | 3  | 1  |
| Chromo(CHRromatinOrganisationMOfifier)domain                 | 25 | 29 |
| StageIIsporulationproteinE(SpoIIE)                           | 1  | 1  |
| Reticulon                                                    | 9  | 7  |
| C2H2typezinc-finger(2copies)                                 | 5  | 5  |
| NuclearfragileXmentalretardation-interactingprotein1(NUFIP1) | 1  | 1  |
| Nuclearporecomplexscaffold,nucleoporins186/192/205           | 3  | 1  |

|                                                    |    |    |
|----------------------------------------------------|----|----|
| Zinc-finger                                        | 3  | 5  |
| Lipopolysaccharidekinase(Kdo/WaaP)family           | 3  | 3  |
| CyanatelyaseC-terminaldomain                       | 1  | 1  |
| Carbonicanhydrase                                  | 7  | 7  |
| Cerato-platanin                                    | 1  | 1  |
| Ctrcoppertransporterfamily                         | 5  | 5  |
| UV-endonucleaseUvdE                                | 1  | 1  |
| Innermembranecomponentdomain                       | 1  | 1  |
| gag-polypeptideofLTRcopia-type                     | 5  | 3  |
| Linalooldehydratase/isomerase                      | 5  | 5  |
| Proteinofunknownfunction(DUF1749)                  | 1  | 1  |
| AAAATPasedomain                                    | 3  | 3  |
| DomainfoundinDishevelled,Egl-10,andPleckstrin(DEP) | 1  | 1  |
| Shortcoiled-coilprotein                            | 5  | 7  |
| Aminotransferaseclass-V                            | 7  | 7  |
| Septin                                             | 5  | 5  |
| Putativeoxalocrotonatetautomeraseenzyme            | 1  | 1  |
| SlimemoldcyclicAMPpreceptor                        | 5  | 5  |
| Histidinephosphatasesuperfamily(branch2)           | 9  | 11 |
| Domainofunknownfunction(DUF2431)                   | 1  | 1  |
| Damage-controlphosphataseARMT1-likedomain          | 1  | 1  |
| Anhydro-N-acetylmuramicacidkinase                  | 1  | 1  |
| Thiamine-bindingprotein                            | 1  | 3  |
| NADHubiquinoneoxidoreductase,20Kdsubunit           | 1  | 1  |
| Calcium-activatedchloridechannel                   | 3  | 3  |
| PDZ-likedomain                                     | 3  | 0  |
| T5orf172domain                                     | 11 | 11 |
| HemerythrinHHEcationbindingdomain                  | 7  | 7  |
| CentromereproteinScm3                              | 1  | 1  |
| Proteinofunknownfunction(DUF3807)                  | 1  | 1  |



|                                                        |    |    |
|--------------------------------------------------------|----|----|
| Vacuolartorting38andautophagy-relatedsubunit14         | 1  | 1  |
| Conservedhypotheticalprotein(DUF2461)                  | 3  | 3  |
| FAM32A                                                 | 1  | 1  |
| PescadilloN-terminus                                   | 1  | 1  |
| Proteinofunknownfunction(DUF659)                       | 5  | 17 |
| CentromereDNA-bindingproteincomplexCBF3subunit,domain2 | 3  | 10 |
| BRCA1CTerminus(BRCT)domain                             | 1  | 1  |
| Wingedhelix-turnhelix                                  | 1  | 1  |
| Adenosinedeaminase                                     | 5  | 5  |
| CHAPdomain                                             | 1  | 3  |
| AdoMetdependentprolinedi-methyltransferase             | 3  | 1  |
| Berberineandberberinlike                               | 1  | 1  |
| Neuraminidase-likedomain                               | 1  | 1  |
| 7transmembranereceptor(Secretinfamily)                 | 3  | 3  |
| WLMdomain                                              | 3  | 3  |
| PutativeFMN-bindingdomain                              | 5  | 3  |
| WGRdomain                                              | 1  | 1  |
| Glycosylhydrolasesfamily11                             | 1  | 1  |
| ProkaryoticphospholipaseA2                             | 3  | 3  |
| HSF-typeDNA-binding                                    | 7  | 7  |
| Nineteencomplex-relatedprotein2                        | 1  | 1  |
| LSMdomain                                              | 13 | 12 |
| Homeodomain                                            | 5  | 5  |
| ZIPZintransporter                                      | 3  | 3  |
| Bestrophin,RFP-TM,chloridechannel                      | 5  | 7  |
| SurvivalproteinSurE                                    | 5  | 5  |
| PSP1C-terminalconservedregion                          | 1  | 0  |
| MYNDfinger                                             | 11 | 56 |
| Erythromycinesterase                                   | 3  | 6  |
| Domainofunknownfunction(DUF1996)                       | 3  | 3  |

|                                                          |    |    |
|----------------------------------------------------------|----|----|
| Nis1family                                               | 3  | 3  |
| Copperamineoxidase,N2domain                              | 1  | 1  |
| PhospholipaseDActivesitemotif                            | 1  | 1  |
| Ringfingerdomain                                         | 13 | 11 |
| Alpha-acetolactatedecarboxylase                          | 3  | 0  |
| Eukaryoticeelongationfactor5Ahypusine,DNA-bindingOBfold  | 1  | 1  |
| Domainofunknownfunction(DUF4939)                         | 1  | 0  |
| Proteinofunknownfunction(DUF3429)                        | 1  | 1  |
| ER-boundoxygenasempaB/B'/Rubberoxygenase,catalyticdomain | 5  | 5  |
| L-asparaginaseII                                         | 1  | 5  |
| PASfold                                                  | 1  | 1  |
| CationtransportATPase(P-type)                            | 1  | 0  |
| Reversetranscriptase-like                                | 1  | 3  |
| FAR1DNA-bindingdomain                                    | 1  | 0  |
| NAT,N-acetyltransferase,ofN-acetylglutamatesynthase      | 1  | 1  |
| Proteinofunknownfunction(DUF3645)                        | 1  | 0  |
| PEP-utilisingenzyme,PEP-bindingdomain                    | 1  | 0  |
| Serineincorporator(Serinc)                               | 1  | 1  |
| SUKH-4immunityprotein                                    | 1  | 3  |
| Cyclin,C-terminaldomain                                  | 1  | 0  |
| TFIIEalphasubunit                                        | 1  | 1  |
| Nuclearcap-bindingproteinsubunit3                        | 1  | 1  |
| SNAREdomain                                              | 1  | 1  |
| RING-H2zincfingerdomain                                  | 3  | 3  |
| CASPCterminal                                            | 1  | 1  |
| Fibrillarin                                              | 1  | 1  |
| mRNACleavageandpolyadenylationfactorCLP1P-loop           | 1  | 1  |
| DASHcomplexsubunitDad1                                   | 1  | 1  |
| MitochondrialATPsynthaseepsilonchain                     | 1  | 1  |
| Mak10subunit,NatCN(alpha)-terminalacetyltransferase      | 1  | 1  |

|                                               |   |   |
|-----------------------------------------------|---|---|
| Skp1family,tetramerisationdomain              | 1 | 1 |
| V-typeATPase116kDasubunitfamily               | 1 | 1 |
| ARP2/3complex16kDasubunit(p16-Arc)            | 1 | 1 |
| Sds3-like                                     | 1 | 1 |
| Proteinofunknownfunction(DUF1757)             | 1 | 1 |
| Mechanosensitiveionchannel                    | 1 | 1 |
| Proteinofunknownfunction(DUF3128)             | 1 | 1 |
| RibosomalL15                                  | 1 | 1 |
| Complex1protein(LYRfamily)                    | 5 | 5 |
| Vps53-like,N-terminal                         | 1 | 1 |
| Dyneinlightchaintype1                         | 1 | 1 |
| Domainofunknownfunction(DUF1708)              | 1 | 1 |
| FirstLongindomainofINTU,CCZ1andHPS4           | 1 | 1 |
| Proteinphosphatase2C                          | 1 | 1 |
| Putativetransmembranefamily234                | 1 | 1 |
| RegioninClathrinandVPS                        | 1 | 1 |
| Proteinofunknownfunction(DUF2462)             | 1 | 1 |
| Coatomerepsilonsubunit                        | 1 | 1 |
| Proteinofunknownfunction(DUF1365)             | 1 | 1 |
| ARID/BRIGHTDNAbindingdomain                   | 3 | 3 |
| SUR7/PalIfamily                               | 7 | 7 |
| MitochondrialbiogenesisAIM24                  | 3 | 3 |
| Rad52/22familydouble-strandbreakrepairprotein | 1 | 1 |
| ORMDLfamily                                   | 1 | 1 |
| Frag1/DRAM/Sfk1family                         | 1 | 1 |
| tRNAsynthetasesclassI(WandY)                  | 5 | 5 |
| Tim10/DDPfamilyzincfinger                     | 1 | 1 |
| CUEdomain                                     | 1 | 1 |
| PPRrepeatfamily                               | 1 | 1 |
| ALG6,ALG8glycosyltransferasefamily            | 1 | 1 |

|                                                             |   |    |
|-------------------------------------------------------------|---|----|
| Sin3associatedpolypeptidp18(SAP18)                          | 1 | 1  |
| Fcf2pre-rRNAprocessing                                      | 1 | 1  |
| Histone-liketranscriptionfactor(CBF/NF-Y)andarchaealhistone | 5 | 5  |
| ExocystcomplexsubunitSec15-like                             | 1 | 1  |
| RNArecognitionmotif2                                        | 1 | 1  |
| Sad1/UNC-likeC-terminal                                     | 1 | 1  |
| PutativezincfingerinN-recognin(UBRbox)                      | 1 | 1  |
| KinetochorecomplexFta4ofSim4subunit,orCENP-50               | 1 | 1  |
| Rftprotein                                                  | 1 | 1  |
| FungalpheromonematingfactorSTE2GPCR                         | 1 | 1  |
| N-acetylglucosaminyltransferasecomponent(Gpi1)              | 1 | 1  |
| Proteinofunknownfunction(DUF1275)                           | 3 | 1  |
| WH1domain                                                   | 1 | 1  |
| RibosomalproteinL37e                                        | 1 | 1  |
| Membranetransportprotein                                    | 3 | 3  |
| RaptorN-terminalCASPaselikedomain                           | 1 | 1  |
| ABC1atypicalkinase-likedomain                               | 1 | 1  |
| MOZ/SASfamily                                               | 1 | 1  |
| CytochromecoxidaseassemblyproteinPET191                     | 1 | 1  |
| Pal1cellmorphologyprotein                                   | 1 | 1  |
| TranscriptioninitiationfactorTFIIDsubunitA                  | 1 | 1  |
| N-terminaldomainofCBF1interactingco-repressorCIR            | 1 | 1  |
| Iron-sulphurclusterbiosynthesis                             | 1 | 1  |
| NucleoporinproteinNdc1-Nup                                  | 1 | 1  |
| Gamma-glutamyltranspeptidase                                | 3 | 3  |
| TranscriptionfactorTfb4                                     | 1 | 1  |
| Anaphase-promotingcomplex,subunit10(APC10)                  | 1 | 1  |
| linkerhistoneH1andH5family                                  | 1 | 1  |
| D123                                                        | 1 | 1  |
| Proteinofunknownfunction(DUF3716)                           | 1 | 17 |

|                                                    |    |    |
|----------------------------------------------------|----|----|
| ChromatinassociatedproteinKTI12                    | 1  | 1  |
| Uncharacterisedproteinfamily,YAP/Alf4/glomulin     | 1  | 1  |
| Sterylacetylhydrolase                              | 1  | 1  |
| Sedlin,N-terminalconservedregion                   | 3  | 3  |
| PrpFprotein                                        | 1  | 1  |
| CENP-SassociatingCentromereproteinX                | 1  | 1  |
| Mitoticcheckpointregulator,MAD2B-interacting       | 1  | 1  |
| S25ribosomalprotein                                | 1  | 1  |
| Macrophagemigrationinhibitoryfactor(MIF)           | 1  | 1  |
| Proteinofunknownfunction(DUF2420)                  | 1  | 1  |
| Myotubularin-likephosphatasedomain                 | 1  | 1  |
| Der1-likefamily                                    | 3  | 3  |
| TruBfamilypseudouridylatesynthase(Nterminaldomain) | 1  | 1  |
| RF-1domain                                         | 1  | 1  |
| Urm1(Ubiquitinrelatedmodifier)                     | 1  | 1  |
| CSLzincfinger                                      | 1  | 1  |
| CutCfamily                                         | 1  | 1  |
| Alkalinephosphatase                                | 1  | 1  |
| Spt4/RpoE2zincfinger                               | 1  | 1  |
| Frataxin-likedomain                                | 1  | 1  |
| Chitinsynthaseexportchaperone                      | 1  | 1  |
| KAPfamilyP-loopdomain                              | 1  | 1  |
| ConservedhypotheticalATPbindingprotein             | 1  | 1  |
| Rpp14/Pop5family                                   | 1  | 1  |
| RibosomalL27proteinfamily                          | 1  | 1  |
| TPR/MLP1/MLP2-likeprotein                          | 1  | 1  |
| DUF218domain                                       | 3  | 3  |
| HistonechaperonedomainCHZ                          | 1  | 1  |
| Cyclin                                             | 43 | 44 |
| Telomerepeatbindingfactor(TRF)                     | 1  | 1  |

|                                                              |   |   |
|--------------------------------------------------------------|---|---|
| UncharacterizedproteinfamilyUPF0029                          | 1 | 1 |
| Eukaryoticproteinofunknownfunction(DUF866)                   | 1 | 1 |
| Innercentromereprotein,ARKbindingregion                      | 1 | 1 |
| TranscriptioninitiationfactorIID,18kDsubunit                 | 3 | 3 |
| Leucinecarboxylmethyltransferase                             | 1 | 1 |
| Beta-glucosidase(SUNfamily)                                  | 3 | 3 |
| MitochondrialK <sup>+</sup> -H <sup>+</sup> exchange-related | 1 | 1 |
| Domainofunknownfunction(DUF4149)                             | 1 | 1 |
| SOR/SNZfamily                                                | 1 | 1 |
| Phosphatidylinositol-4-phosphate5-Kinase                     | 1 | 1 |
| Nucleosidediphosphatekinase                                  | 1 | 1 |
| MitochondrialimportproteinPam17                              | 1 | 1 |
| RibosomebiogenesisproteinSLX9                                | 1 | 1 |
| SMODSandSLOG-associating2TMeffectordomain                    | 1 | 1 |
| zinc-RINGfingerdomain                                        | 1 | 1 |
| Spo7-likeprotein                                             | 1 | 1 |
| Inositolmonophosphatasefamily                                | 3 | 3 |
| DehydroquinaseclassII                                        | 1 | 1 |
| Myb/SANT-likeDNA-bindingdomain                               | 1 | 1 |
| U4/U6.U5smallnuclearribonucleoproteins                       | 1 | 1 |
| Acyl-coenzymeA:6-aminopenicillanicacidacyl-transferase       | 1 | 1 |
| Whi5like                                                     | 1 | 1 |
| Thi4family                                                   | 1 | 1 |
| MitochondrialF1-F0ATPsynthasesubunitFoffungi                 | 1 | 1 |
| ETCcomplexIsubunitconservedregion                            | 1 | 1 |
| RibosomalproteinS19e                                         | 1 | 1 |
| Universalstressproteinfamily                                 | 1 | 1 |
| MBOAT,membrane-boundO-acyltransferasefamily                  | 5 | 5 |
| CDP-alcoholphosphatidyltransferase                           | 3 | 3 |
| Gti1/Pac2family                                              | 3 | 3 |

|                                                    |   |   |
|----------------------------------------------------|---|---|
| ARD/ARD'family                                     | 1 | 1 |
| Proline-richnuclearreceptorcoactivatormotif        | 1 | 1 |
| Fructose-bisphosphatealdolaseclass-II              | 7 | 7 |
| Mediatorcomplexprotein                             | 1 | 1 |
| Clpprotease                                        | 1 | 1 |
| Lipid-dropletassociatedhydrolase                   | 1 | 1 |
| TypeIIBDNAtopoisomerase                            | 1 | 1 |
| Dcp1-likedecappingfamily                           | 1 | 1 |
| AmmoniumTransporterFamily                          | 5 | 5 |
| BAGdomain                                          | 1 | 1 |
| Proteinofunknownfunction(DUF1348)                  | 1 | 1 |
| LamB/YcsFfamily                                    | 1 | 1 |
| Septationproteinetd1                               | 1 | 1 |
| Ornithinecyclodeaminase/mu-crystallinfamily        | 1 | 1 |
| Ubiquinol-cytochromeCreductasehingeprotein         | 1 | 1 |
| CyclinMtransmembraneN-terminaldomain               | 1 | 1 |
| Fungalpotassiumchannel                             | 1 | 1 |
| Cytidylyltransferase-like                          | 3 | 3 |
| CHYzincfinger                                      | 3 | 3 |
| Proteinofunknownfunction(DUF2457)                  | 1 | 1 |
| ATPsynthase,Delta/Epsilonchain,beta-sandwichdomain | 1 | 1 |
| TATA-bindingproteininteracting(TIP20)              | 1 | 1 |
| DNA/RNAon-specificendonuclease                     | 1 | 1 |
| Apc13pprotein                                      | 1 | 1 |
| Uncharacterisedprotein(DUF2406)                    | 1 | 1 |
| RhoGEFdomain                                       | 1 | 1 |
| RTC4-likedomain                                    | 1 | 1 |
| ThiSfamily                                         | 1 | 1 |
| HITzincfinger                                      | 1 | 1 |
| RibosomalproteinL36e                               | 1 | 1 |

|                                                   |   |   |
|---------------------------------------------------|---|---|
| CIDdomain                                         | 1 | 1 |
| Yos1-like                                         | 1 | 1 |
| Proteinphosphatase2AregulatoryBsubunit(B56family) | 1 | 1 |
| Proteinofunknownfunction(DUF962)                  | 1 | 1 |
| PWWPdomain                                        | 1 | 1 |
| DHHCpalmitoyltransferase                          | 1 | 1 |
| ChromatinremodellingcomplexRsc7/Swp82subunit      | 3 | 3 |
| Proteinofunknownfunction(DUF1765)                 | 1 | 1 |
| RibosomalproteinL11methyltransferase(PrmA)        | 1 | 1 |
| Dualspecificityphosphatase,catalyticdomain        | 7 | 7 |
| CPL(NUC119)domain                                 | 1 | 1 |
| Triose-phosphateTransporterfamily                 | 1 | 1 |
| Fungaldomainofunknownfunction(DUF1746)            | 1 | 1 |
| Bromodomainassociated                             | 1 | 1 |
| HistoneacetyltransferasesubunitNuA4               | 1 | 1 |
| PWIdomain                                         | 1 | 1 |
| Carbohydratekinase                                | 1 | 1 |
| Phosphomethylpyrimidinekinase                     | 1 | 1 |
| Mysoin-bindingmotifofperoxisomes                  | 1 | 1 |
| RibosomalproteinL34                               | 1 | 1 |
| VitaminB6photo-protectionandhomeostasis           | 1 | 1 |
| Mediatorcomplexsubunit16                          | 1 | 1 |
| Proteinofunknownfunction(DUF1674)                 | 1 | 1 |
| HistonedeacetylationproteinRxt3                   | 1 | 1 |
| 60sAcidicribosomalprotein                         | 1 | 1 |
| D-Tyr-tRNA(Tyr)deacylase                          | 1 | 1 |
| SAC3/GANPfamily                                   | 1 | 1 |
| SisterchromatidcohesionproteinDcc1                | 1 | 1 |
| RHOproteinGDPdissociationinhibitor                | 1 | 1 |
| ExonucleaseV-a5'deoxyribonuclease                 | 1 | 1 |



|                                                  |   |   |
|--------------------------------------------------|---|---|
| FKBP-typepeptidyl-prolylcis-transisomerase       | 1 | 1 |
| C2domain                                         | 1 | 1 |
| Nitronatemonooxygenase                           | 3 | 3 |
| Tht1-likenuclearfusionprotein                    | 1 | 1 |
| ComplexIntermediate-associatedprotein30(CIA30)   | 1 | 1 |
| Mannosyltransferase(PIG-V)                       | 1 | 1 |
| Proteinofunknownfunction(DUF2433)                | 1 | 1 |
| Fungalhydrophobin                                | 4 | 4 |
| RNAligase                                        | 3 | 3 |
| Domainofunknownfunction(DUF4291)                 | 1 | 1 |
| Proteinofunknownfunction(DUF3112)                | 1 | 1 |
| GPR1/FUN34/yaaHfamily                            | 5 | 5 |
| TrypsinInhibitorlikecysteinerichdomain           | 1 | 1 |
| SISdomain                                        | 3 | 3 |
| MRC1-likedomain                                  | 1 | 1 |
| UbiquinonebiosynthesisproteinCOQ7                | 3 | 3 |
| DNAreplicationfactorCdt1C-terminaldomain         | 1 | 1 |
| GlycogenrecognitionsofAMP-activatedproteinkinase | 1 | 1 |
| RibosomalproteinL22p/L17e                        | 1 | 1 |
| Serinehydroxymethyltransferase                   | 1 | 1 |
| Ribosomalprotein60SL18and50SL18e                 | 1 | 1 |
| DDHDdomain                                       | 1 | 1 |
| SOSresponseassociatedpeptidase(SRAP)             | 1 | 1 |
| Down-regulatedinmetastasis                       | 1 | 1 |
| PeptidaseM50B-like                               | 1 | 1 |
| DNApolymerasephi                                 | 1 | 1 |
| Rad9                                             | 1 | 1 |
| Prephenatedehydrogenase                          | 1 | 1 |
| Atg29N-terminaldomain                            | 1 | 1 |
| PXdomain                                         | 3 | 3 |

|                                                            |   |   |
|------------------------------------------------------------|---|---|
| N-acetyltransferase                                        | 7 | 7 |
| Rogdileucinezippercontainingprotein                        | 1 | 1 |
| Bacterialextracellularsolute-bindingproteins,family5Middle | 1 | 1 |
| Fumble                                                     | 1 | 1 |
| TranscriptionfactorPcc1                                    | 1 | 1 |
| 3'-5'exonuclease                                           | 5 | 5 |
| Ricin-typebeta-trefoillectindomain-like                    | 1 | 1 |
| MIOREXcomplexcomponent7                                    | 1 | 1 |
| Prefoldinsubunit                                           | 5 | 5 |
| SigmadomainonNACHT-NTPases                                 | 1 | 1 |
| RibosomalproteinS26e                                       | 1 | 1 |
| Gcd10pfamily                                               | 1 | 1 |
| Chorismatesynthase                                         | 1 | 1 |
| MitochondrialribosomalproteinS25                           | 1 | 1 |
| CytochromecoxidasesubunitVIIC                              | 1 | 1 |
| Ima1N-terminaldomain                                       | 1 | 1 |
| GYFdomain                                                  | 1 | 1 |
| RNAmethyltransferase                                       | 7 | 7 |
| Cytidylyltransferasefamily                                 | 1 | 1 |
| Proteinofunknownfunction(DUF3636)                          | 1 | 1 |
| RibonucleaseH2non-catalyticsubunit(Ylr154p-like)           | 1 | 1 |
| TubulinbindingcofactorA                                    | 1 | 1 |
| RibosomalproteinL24e                                       | 1 | 1 |
| MA3domain                                                  | 1 | 1 |
| Interferon-induced6-16family                               | 1 | 1 |
| Legume-likelectinfamily                                    | 1 | 1 |
| PLD-likedomain                                             | 3 | 3 |
| Sulphurtransport                                           | 1 | 1 |
| EisosomecomponentPIL1                                      | 1 | 1 |
| Inorganicpyrophosphatase                                   | 1 | 1 |

|                                              |   |   |
|----------------------------------------------|---|---|
| MT-A70                                       | 1 | 1 |
| Cytochromeoxidaseassembly                    | 1 | 1 |
| RibosomalproteinL13e                         | 1 | 1 |
| Pam16                                        | 1 | 1 |
| MitochondrialgenomemaintenanceMGM101         | 1 | 1 |
| TB2/DP1,HVA22family                          | 1 | 1 |
| Sec1-bindingregionofMso1                     | 1 | 1 |
| Calreticulinfamily                           | 1 | 1 |
| Cenp-Okinetochorecentromerecomponent         | 1 | 1 |
| EssentialproteinYae1,Nterminal               | 1 | 1 |
| Mitochondrialinner-membrane-boundregulator   | 1 | 1 |
| Cofilin/tropomyosin-typeactin-bindingprotein | 3 | 3 |
| HITdomain                                    | 1 | 1 |
| Etoposide-inducedprotein2.4(EI24)            | 1 | 1 |
| Protoglobin                                  | 1 | 1 |
| Arylesterase                                 | 3 | 3 |
| DAHPsynthetaseIfamily                        | 1 | 1 |
| EMG1/NEP1methyltransferase                   | 1 | 1 |
| ConservedoligomericcomplexCOG6               | 1 | 1 |
| AutophagyproteinATG9                         | 1 | 1 |
| SGT1protein                                  | 1 | 1 |
| Lecithin:cholesterolacyltransferase          | 1 | 1 |
| Proteinofunknownfunction(DUF2013)            | 1 | 1 |
| Gar1/Naf1RNAbindingregion                    | 1 | 1 |
| ATPsynthasecomplexsubunith                   | 1 | 1 |
| CP2transcriptionfactor                       | 1 | 1 |
| EukaryotictranslationinitiationfactoreIF2A   | 1 | 1 |
| Retrotransposongagprotein                    | 1 | 1 |
| Nucleotide-sugartransporter                  | 1 | 1 |
| OsmC-likeprotein                             | 1 | 1 |

|                                                       |   |   |
|-------------------------------------------------------|---|---|
| AAA-ATPaseVps4-associatedprotein1                     | 1 | 1 |
| HistonechaperoneRtt106-like                           | 1 | 1 |
| ArgininosuccinatelyaseC-terminal                      | 1 | 1 |
| Proteinofunknownfunction(DUF1264)                     | 1 | 1 |
| MeiosisproteinSPO22/ZIP4like                          | 1 | 1 |
| NLIinteractingfactor-likephosphatase                  | 1 | 1 |
| MediatorofRNAPolymeraseIItranscriptioncomplexsubunit8 | 1 | 1 |
| Acylphosphatase                                       | 1 | 1 |
| RibosomalproteinS13/S18                               | 1 | 1 |
| Hepatocellularcarcinoma-associatedantigen59           | 1 | 1 |
| Transcriptionalregulator                              | 1 | 1 |
| Alg9-likemannosyltransferasefamily                    | 1 | 1 |
| Putativedeath-receptorfusionprotein(DUF2428)          | 1 | 1 |
| Proteinofunknownfunction(DUF3074)                     | 1 | 1 |
| AutophagyreceptorATG43                                | 1 | 1 |
| ChaC-likeprotein                                      | 1 | 1 |
| Proteinofunknownfunction(DUF1223)                     | 1 | 1 |
| Nitroreductasefamily                                  | 1 | 1 |
| AcidPhosphatase                                       | 1 | 1 |
| PHdomain                                              | 1 | 1 |
| Phosphatidatecytidyltransferase,mitochondrial         | 1 | 1 |
| ATPsynthaseEchain                                     | 1 | 1 |
| MitochondrialribosomalproteinL27                      | 1 | 1 |
| Utp14protein                                          | 1 | 1 |
| HECT-likeUbiquitin-conjugatingenzyme(E2)-binding      | 1 | 1 |
| WH2motif                                              | 1 | 1 |
| MitochondrialribosomalproteinL37                      | 1 | 1 |
| PeptidasefamilyM49                                    | 1 | 1 |
| Inosine-uridinepreferringnucleosidehydrolase          | 1 | 1 |
| Mitochondrialpyruvatecarriers                         | 1 | 1 |

|                                                               |   |   |
|---------------------------------------------------------------|---|---|
| MitochondrialribosomalproteinL51/S25/CI-B8domain              | 1 | 1 |
| Proteinofunknownfunction(DUF1687)                             | 1 | 1 |
| RibosomalproteinL14                                           | 1 | 1 |
| ATPsynthaseDchain,mitochondrial(ATP5H)                        | 1 | 1 |
| PhosphatidylinositolN-acetylglucosaminytransferase            | 1 | 1 |
| SOH1                                                          | 1 | 1 |
| Thaumatinfamily                                               | 1 | 1 |
| Domainofunknownfunction(DUF4336)                              | 1 | 1 |
| Salttolerancedown-regulator                                   | 1 | 1 |
| PGAP1-likeprotein                                             | 1 | 1 |
| Nucleolarprotein,Nop52                                        | 1 | 1 |
| L-lysine6-monooxygenase(NADPH-requiring)                      | 3 | 3 |
| RibosomalproteinS19                                           | 3 | 3 |
| 6-O-methylguanineDNAmethyltransferase,DNAbindingdomain        | 1 | 1 |
| ERCC4domain                                                   | 1 | 1 |
| Semialdehydedehydrogenase,NADbindingdomain                    | 1 | 1 |
| Phosphoglucomutase/phosphomannomutase,alpha/beta/alphadomainI | 1 | 1 |
| Cadmiumresistancetransporter                                  | 1 | 1 |
| ExocystcomplexcomponentSec6                                   | 1 | 1 |
| RibonucleaseP40kDa(Rpp40)subunit                              | 1 | 1 |
| Tim44-likedomain                                              | 1 | 1 |
| RibosomalproteinS7p/S5e                                       | 1 | 1 |
| PASdomain                                                     | 3 | 3 |
| Sodium:dicarboxylatesymporterfamily                           | 1 | 1 |
| Leucinerichrepeat                                             | 1 | 1 |
| Transcriptionalactivatorofglycolyticenzymes                   | 1 | 5 |
| Fungalchitosanaseofglycosylhydrolasegroup75                   | 1 | 1 |
| RNApolymeraseIIIRPC4                                          | 1 | 1 |
| N-terminaldomainonNACHT_NTPaseandP-loopNTPases                | 2 | 2 |
| Phospholipase_D-nucleaseN-terminal                            | 1 | 1 |

|                                                            |    |    |
|------------------------------------------------------------|----|----|
| Mature-T-CellProliferationItype                            | 1  | 1  |
| Eukaryotictranslationinitiationfactor3subunit7(eIF-3)      | 1  | 1  |
| Got1/Sft2-likefamily                                       | 1  | 1  |
| Acetokinasefamily                                          | 1  | 1  |
| HMG-boxdomain                                              | 1  | 1  |
| O-methyltransferase                                        | 29 | 35 |
| Condensincomplexsubunit2                                   | 1  | 1  |
| Memo-likeprotein                                           | 1  | 1  |
| Ssu72-likeprotein                                          | 1  | 1  |
| AhpC/TSAfamily                                             | 1  | 1  |
| Solutecarrierfamily35                                      | 1  | 1  |
| CLN3protein                                                | 1  | 1  |
| Ribosomebiogenesisregulatoryprotein(RRS1)                  | 1  | 1  |
| Mitochondrialribosomaldeath-associatedprotein3             | 1  | 1  |
| RepairproteinRad1/Rec1/Rad17                               | 1  | 1  |
| Eukaryoticinitiationfactor4E                               | 1  | 1  |
| TRAPPtraffickingsubunitTrs65                               | 1  | 1  |
| DNAreplicationregulatorSLD3                                | 1  | 1  |
| BNRrepeat-containingfamilymember                           | 1  | 1  |
| RapidALkalinizationFactor(RALF)                            | 1  | 1  |
| Pyroglutamylpeptidase                                      | 1  | 1  |
| DADfamily                                                  | 1  | 1  |
| GAFdomain                                                  | 1  | 1  |
| SANT/Myb-likedomainofDAMP1                                 | 1  | 1  |
| Pentatricopeptiderepeatdomain                              | 1  | 1  |
| SUZdomain                                                  | 1  | 1  |
| Utp25,U3smallnucleolarRNA-associatedSSUprocessomeprotein25 | 1  | 1  |
| Alteredinheritanceofmitochondria5                          | 1  | 1  |
| DomainfoundinIF2B/IF5                                      | 1  | 1  |
| Glycosyltransferasefamily28C-terminaldomain                | 1  | 0  |

|                                                       |   |   |
|-------------------------------------------------------|---|---|
| Uncharacterizedconservedprotein(DUF2183)              | 3 | 3 |
| CoproporphyrinogenIIIoxidase                          | 1 | 1 |
| HOOKdomain                                            | 1 | 1 |
| LYAR-typeC2HCzincfinger                               | 1 | 1 |
| R3Hdomain                                             | 1 | 1 |
| KaiC                                                  | 1 | 1 |
| Domainofunknownfunction(DUF202)                       | 3 | 3 |
| Ubiquitin-2likeRad60SUMO-like                         | 1 | 1 |
| NMD3family                                            | 1 | 1 |
| 16SrRNAmethyltransferaseRsmB/F                        | 3 | 3 |
| LETM1-likeprotein                                     | 1 | 1 |
| PeptidasefamilyC69                                    | 1 | 1 |
| Vacuolarproteinorting38                               | 1 | 1 |
| Guanylatekinase                                       | 1 | 1 |
| Fattyacidhydroxylasesuperfamily                       | 3 | 3 |
| EXSfamily                                             | 1 | 1 |
| Ppx/GppAphosphatasefamily                             | 1 | 1 |
| 3-hydroxyanthranilicaciddioxygenase                   | 1 | 1 |
| YT521-B-likedomain                                    | 1 | 1 |
| NucleoporinNup120/160                                 | 1 | 1 |
| ATPsynthaseregulationproteinNCA2                      | 1 | 1 |
| Pterin4alphacarbinolaminatedehydratase                | 1 | 1 |
| Dpy-30motif                                           | 1 | 1 |
| CatalyticLigBsubunitofaromaticring-openingdioxygenase | 3 | 3 |
| NADHubiquinoneoxidoreductasesubunitNDUFA12            | 3 | 3 |
| Calponinhomology(CH)domain                            | 1 | 1 |
| Chitinrecognitionprotein                              | 1 | 1 |
| Glycosylhydrolasefamily62                             | 1 | 1 |
| 3-dehydroquinate synthase                             | 1 | 1 |
| Chromatinmodification-relatedproteinEAF7              | 1 | 1 |

|                                                            |   |   |
|------------------------------------------------------------|---|---|
| RING-typezinc-finger                                       | 1 | 1 |
| RNApolymerasesM/15Kdsubunit                                | 1 | 1 |
| Surfeitlocusprotein5subunit22ofMediatorcomplex             | 1 | 1 |
| Proteinofunknownfunction(DUF3431)                          | 1 | 1 |
| Histoneacetylationprotein                                  | 1 | 1 |
| Alb1                                                       | 1 | 1 |
| Signalpeptidase,peptidaseS26                               | 1 | 1 |
| ReplicationfactorAprotein3                                 | 1 | 1 |
| RibosomalproteinL4/L1family                                | 1 | 1 |
| Domainofunknownfunction(DUF4188)                           | 1 | 1 |
| Ribonuclease-III-like                                      | 1 | 1 |
| Domainofunknownfunction(DUF4048)                           | 1 | 1 |
| TranscriptionfactorOpi1                                    | 1 | 1 |
| CyclinC-terminaldomain                                     | 1 | 1 |
| Syntaxin6,N-terminal                                       | 1 | 1 |
| Domainofunknownfunction(DUF1857)                           | 1 | 1 |
| CDC45-likeprotein                                          | 1 | 1 |
| ExocystcomplexcomponentSec5                                | 1 | 1 |
| mRNAcappingenzyme,betachain                                | 1 | 1 |
| PeptidaseC65Otubain                                        | 1 | 1 |
| Isy1-likesplicingfamily                                    | 1 | 1 |
| Bacterialproteinofunknownfunction(DUF885)                  | 1 | 0 |
| UncharacterisedACR,YagEfamilyCOG1723                       | 1 | 1 |
| KinetochoreproteinMis14like                                | 1 | 1 |
| VesiclecoatproteininvolvedinGolgitoplasmamembranetransport | 1 | 1 |
| DSBA-likethioredoxindomain                                 | 1 | 1 |
| betasubunitofN-acylethanolamine-hydrolyzingacidamidase     | 1 | 1 |
| Bacteriocin-protection,YdeIorOmpD-Associated               | 1 | 1 |
| YhhNfamily                                                 | 1 | 1 |
| Proteinofunknownfunction(DUF1295)                          | 1 | 1 |



|                                                              |   |   |
|--------------------------------------------------------------|---|---|
| Macrodomain                                                  | 1 | 1 |
| Stretch-activatedCa <sup>2+</sup> -permeablechannelcomponent | 1 | 1 |
| Eisosomeprotein1                                             | 1 | 1 |
| AdaptinNterminalregion                                       | 1 | 1 |
| Single-strandbindingproteinfamily                            | 1 | 1 |
| PheromoneAreceptor                                           | 1 | 1 |
| Sterol-sensingdomainofSREBPcleavage-activation               | 1 | 1 |
| B-blockbindingsubunitofTFIIIC                                | 1 | 1 |
| GolginsubfamilyAmember7/ERF4family                           | 1 | 1 |
| RibosomalproteinL1p/L10efamily                               | 1 | 1 |
| MinimalbindingmotifofHap4forbindingtoHap2/3/5                | 1 | 1 |
| SBF-likeCPAtransporterfamily(DUF4137)                        | 1 | 1 |
| RibosomalproteinS21                                          | 1 | 1 |
| Capsularpolysaccharidesynthesisprotein                       | 1 | 1 |
| Prolineracemase                                              | 1 | 1 |
| N2227-likeprotein                                            | 1 | 1 |
| Eukaryoticmembraneproteinfamily                              | 1 | 1 |
| U1zincfinger                                                 | 1 | 1 |
| Integrasezincbindingdomain                                   | 1 | 0 |
| TFIIICsubunittriplebarreldomain                              | 1 | 1 |
| Ornithinedecarboxylaseantizyme                               | 1 | 1 |
| INO80complexsubunitles4                                      | 1 | 1 |
| ThiopurineS-methyltransferase(TPMT)                          | 1 | 1 |
| OTU-likecysteineprotease                                     | 1 | 1 |
| Hexapeptiderepeatofsuccinyl-transferase                      | 1 | 1 |
| PeptidasefamilyS58                                           | 1 | 1 |
| PPIC-typePPIASEdomain                                        | 1 | 1 |
| tRNApseudouridinesynthaseD(TruD)                             | 1 | 1 |
| Copper/zincsuperoxidedismutase(SODC)                         | 1 | 0 |
| Uncharacterisedproteinfamily(UPF0139)                        | 1 | 1 |

|                                                            |   |   |
|------------------------------------------------------------|---|---|
| BacterialIg-likedomain(group3)                             | 1 | 1 |
| Bucentaurorcraniofacialdevelopment                         | 1 | 1 |
| Domainofunknownfunction(DUF4602)                           | 1 | 1 |
| ESCRT-IIcomplexsubunit                                     | 1 | 1 |
| Nucleosidetransporter                                      | 1 | 1 |
| Cytochromec/c1hemelyase                                    | 1 | 1 |
| BUD22                                                      | 1 | 1 |
| Integralperoxisomalmembraneperoxin                         | 1 | 1 |
| Acyltransferase                                            | 9 | 7 |
| Lungseventransmembranereceptor                             | 1 | 1 |
| PutativeS-adenosyl-L-methionine-dependentmethyltransferase | 1 | 1 |
| Haspinlikekinasedomain                                     | 1 | 1 |
| CytoplasmictRNA2-thiolationprotein2                        | 1 | 1 |
| pinin/SDK/memA/proteinconservedregion                      | 1 | 1 |
| ThreonylandAlanylRNA synthetasessecondadditionaldomain     | 3 | 3 |
| ElectrontransferflavoproteinFAD-bindingdomain              | 1 | 1 |
| 39SmitochondrialribosomalproteinL46                        | 1 | 1 |
| U3snoRNAassociated                                         | 1 | 1 |
| Nucleoside2-deoxyribosyltransferaselike                    | 1 | 1 |
| 4Fe-4Sdiclusterdomain                                      | 1 | 1 |
| MybDNA-bindinglike                                         | 1 | 1 |
| Ribosomalproteins50S-L15,50S-L18e,60S-L27A                 | 1 | 1 |
| Mtf2family                                                 | 1 | 1 |
| CytochromecoxidasebiogenesisproteinCmc1like                | 1 | 1 |
| Membrane-associatingdomain                                 | 1 | 1 |
| POTfamily                                                  | 5 | 5 |
| Orotidine5'-phosphatedecarboxylase/HUMPSfamily             | 1 | 1 |
| Carbohydrate/starch-bindingmodule(family21)                | 1 | 1 |
| Lyticpolysaccharidemono-oxygenase,cellulose-degrading      | 1 | 1 |
| High-affinitynickel-transportprotein                       | 1 | 1 |

|                                           |   |   |
|-------------------------------------------|---|---|
| RmlDsubstratebindingdomain                | 1 | 1 |
| Glyoxalase-likedomain                     | 3 | 3 |
| PBPsuperfamilydomain                      | 1 | 1 |
| Glyceratekinasefamily                     | 1 | 1 |
| Mus7/MMS22family                          | 1 | 1 |
| Pex14N-terminaldomain                     | 1 | 1 |
| PAPA-1-likeconservedregion                | 1 | 1 |
| Proteinofunknownfunction(DUF4050)         | 1 | 1 |
| Gon7family                                | 1 | 1 |
| HbrB-like                                 | 1 | 1 |
| LIM-domainbindingprotein                  | 1 | 1 |
| EMC6                                      | 1 | 1 |
| PHD-finger                                | 3 | 3 |
| UAAtransporterfamily                      | 3 | 3 |
| AMPdeaminase                              | 1 | 1 |
| Putativepeptidasefamily                   | 1 | 1 |
| TatDrelatedDNase                          | 1 | 1 |
| RNApolymeraseRpb3/Rpb11dimerisationdomain | 1 | 1 |
| Phosphatidylethanolamine-bindingprotein   | 1 | 1 |
| LVIVDrepeat                               | 1 | 1 |
| Glycosylhydrolasesfamily17                | 1 | 1 |
| MAC/Perforindomain                        | 1 | 1 |
| Domainofunknownfunction(DUF4604)          | 1 | 1 |
| CytochromecoxidasesubunitVb               | 1 | 1 |
| GCN5-likeprotein1(GCN5L1)                 | 1 | 1 |
| Ctf8                                      | 1 | 1 |
| Putativediphthamidesynthesisprotein       | 1 | 1 |
| DASHcomplexsubunitDad3                    | 1 | 1 |
| Sugar-transporters,12TM                   | 1 | 1 |
| Polyprenylsynthetase                      | 1 | 1 |

|                                                             |   |   |
|-------------------------------------------------------------|---|---|
| CorehistoneH2A/H2B/H3/H4                                    | 1 | 1 |
| UbiquitininfusiondegradationproteinUFD1                     | 1 | 1 |
| Proteinofunknownfunction(DUF726)                            | 1 | 1 |
| EutQ-likecupindomain                                        | 1 | 5 |
| PRA1familyprotein                                           | 1 | 1 |
| Aminoglycoside3-N-acetyltransferase                         | 1 | 1 |
| Arsenicalpumpmembraneprotein                                | 1 | 1 |
| Glucosamine-6-phosphateisomerases/6-phosphogluconolactonase | 1 | 1 |
| Diphthamidesynthase                                         | 1 | 1 |
| Squalene/phytoenesynthase                                   | 1 | 1 |
| TranscriptionfactorIwr1                                     | 1 | 1 |
| MINDYdeubiquitinase                                         | 0 | 1 |
| GlucoseinhibiteddivisionproteinA                            | 0 | 1 |
| Aromaticacidexporterfamilymember2                           | 0 | 1 |
| MOSCN-terminalbetabarreldomain                              | 0 | 1 |
| ABC-2familytransporterprotein                               | 0 | 1 |
| Proteinofunknownfunction(DUF1682)                           | 0 | 1 |
| Zinc-fingerofC2H2type                                       | 0 | 1 |
| BEDzincfinger                                               | 0 | 3 |
| Thymidylatesynthase                                         | 0 | 1 |
| HypervirulenceassociatedproteinsTUDORdomain                 | 0 | 1 |
| Bladdercancer-relatedproteinBC10                            | 0 | 1 |
| PeptidaseC26                                                | 0 | 1 |

| <b>Supplementary data 2-Table 4 : predicted unique-gene families of <i>Fusarium oxysporum</i>. f. sp <i>albedinis</i> strains.</b> |                                                               |                                                            |
|------------------------------------------------------------------------------------------------------------------------------------|---------------------------------------------------------------|------------------------------------------------------------|
| <b>Gene families</b>                                                                                                               | <b><i>Fusarium oxysporum</i>. f. sp <i>albedinis</i> 133.</b> | <b><i>Fusarium oxysporum</i>. f. sp <i>albedinis</i> 9</b> |
|                                                                                                                                    | <b>Gene count</b>                                             | <b>Gene count</b>                                          |
| Prion-inhibitionandpropagation                                                                                                     | 1                                                             | 0                                                          |
| FungalZn(2)-Cys(6)binuclearclusterdomain                                                                                           | 1                                                             | 24                                                         |
| FADbindingdomain                                                                                                                   | 3                                                             | 13                                                         |
| Asparaginesynthase                                                                                                                 | 1                                                             | 0                                                          |
| AMP-bindingenzyme                                                                                                                  | 1                                                             | 1                                                          |
| Fungalspecifictranscriptionfactordomain                                                                                            | 19                                                            | 41                                                         |
| Ankyrinrepeats(3copies)                                                                                                            | 15                                                            | 43                                                         |
| DDEsuperfamilyendonuclease                                                                                                         | 41                                                            | 273                                                        |
| Chromoshadowdomain                                                                                                                 | 1                                                             | 0                                                          |
| FMN-dependentdehydrogenase                                                                                                         | 1                                                             | 7                                                          |
| AuxiliaryActivityfamily9(formerlyGH61)                                                                                             | 1                                                             | 1                                                          |
| RegulatorofGproteinsignalingdomain                                                                                                 | 1                                                             | 1                                                          |
| hATfamilyC-terminaldimerisationregion                                                                                              | 21                                                            | 334                                                        |
| Possiblelysinedecarboxylase                                                                                                        | 1                                                             | 0                                                          |
| Responseregulatorreceiverdomain                                                                                                    | 1                                                             | 0                                                          |
| Transcriptionalactivatorofglycolyticenzymes                                                                                        | 1                                                             | 3                                                          |
| WGRdomain                                                                                                                          | 5                                                             | 1                                                          |
| MOSCdomain                                                                                                                         | 1                                                             | 0                                                          |
| CentromereDNA-bindingproteincomplexCBF3subunit,domain2                                                                             | 1                                                             | 31                                                         |
| Beta-lactamase                                                                                                                     | 5                                                             | 9                                                          |
| WDdomain,G-betarepeat                                                                                                              | 1                                                             | 9                                                          |
| NACHTdomain                                                                                                                        | 1                                                             | 9                                                          |
| Enoyl-CoAhydratase/isomerase                                                                                                       | 1                                                             | 0                                                          |
| Sulfatepermeasefamily                                                                                                              | 1                                                             | 5                                                          |
| Chromatetransporter                                                                                                                | 1                                                             | 3                                                          |

|                                                      |    |     |
|------------------------------------------------------|----|-----|
| Multicopperoxidase                                   | 1  | 0   |
| Tetratricopeptiderepeat                              | 1  | 9   |
| Proteinofunknownfunction(DUF3638)                    | 1  | 0   |
| Cyclin,N-terminaldomain                              | 1  | 1   |
| Reverse transcriptase(RNA-dependentDNAPolymerase)    | 13 | 160 |
| Calcium-dependentchannel,7TMregion,putativephosphate | 1  | 5   |
| Sodium/calciumexchangerprotein                       | 1  | 5   |
| Tc5transposaseDNA-bindingdomain                      | 5  | 43  |
| shortchaindehydrogenase                              | 3  | 5   |
| TransposaseIS4                                       | 19 | 85  |
| LysMdomain                                           | 3  | 0   |
| Sugar(andother)transporter                           | 3  | 9   |
| Heterokaryonincompatibilityprotein(HET)              | 3  | 21  |
| MajorFacilitatorSuperfamily                          | 9  | 9   |
| Domainofunknownfunction(DUF5071)                     | 1  | 0   |
| Orsellinicacid/F9775biosynthesisclusterproteinD      | 3  | 25  |
| WSCdomain                                            | 1  | 3   |
| AIG1family                                           | 1  | 1   |
| CytochromeP450                                       | 9  | 25  |
| Fungalproteinkinase                                  | 1  | 1   |
| alpha/betahydrolasefold                              | 3  | 1   |
| Whi5like                                             | 1  | 1   |
| GlutathioneS-transferase,C-terminaldomain            | 1  | 1   |
| Proteinofunknownfunction(DUF1593)                    | 1  | 0   |
| RNaseH                                               | 10 | 23  |
| Glycosylhydrolasesfamily18                           | 3  | 7   |
| CHATdomain                                           | 1  | 11  |
| Cellulase(glycosylhydrolasefamily5)                  | 1  | 1   |
| Flavin-bindingmonooxygenase-like                     | 1  | 5   |
| NADH:flavinoxidoreductase/NADHoxidasefamily          | 1  | 3   |

|                                                              |   |    |
|--------------------------------------------------------------|---|----|
| Ulp1proteasefamily,C-terminalcatalyticdomain                 | 1 | 1  |
| Phosphatidylserinedecarboxylase                              | 1 | 0  |
| MAC/Perforindomain                                           | 1 | 1  |
| Proteinofunknownfunction(DUF4238)                            | 1 | 0  |
| Glyoxalase/Bleomycinresistanceprotein/Dioxygenasesuperfamily | 1 | 0  |
| Methyltransferasedomain                                      | 1 | 5  |
| CFEMdomain                                                   | 3 | 1  |
| Phosphotransferaseenzymeefamily                              | 3 | 0  |
| Berberineandberberinlike                                     | 1 | 1  |
| HNHendonuclease                                              | 1 | 1  |
| Serinecarboxypeptidase                                       | 1 | 1  |
| PIF1-likehelicase                                            | 1 | 17 |
| Acetyltransferase(GNAT)family                                | 1 | 0  |
| NADdependentepimerase/dehydratasefamily                      | 1 | 0  |
| DnaJdomain                                                   | 3 | 3  |
| Amino-transferaseclassIV                                     | 1 | 0  |
| Cationtransportprotein                                       | 1 | 0  |
| Basicregionleucinezipper                                     | 1 | 0  |
| GAG-pre-integrasedomain                                      | 1 | 1  |
| Fumarylacetoacetate(FAA)hydrolasefamily                      | 1 | 1  |
| Commoncentraldomainoftyrosinase                              | 1 | 0  |
| NmrA-likefamily                                              | 1 | 17 |
| Cysteine-richsecretoryproteinfamily                          | 1 | 3  |
| Permeasefor cytosine/purines,uracil,thiamine,allantoin       | 3 | 1  |
| Retrotransposongagprotein                                    | 1 | 1  |
| FAR1DNA-bindingdomain                                        | 1 | 0  |
| BRCA1CTerminus(BRCT)domain                                   | 1 | 0  |
| Helitronhelicase-likedomainatN-terminus                      | 1 | 99 |
| Endonuclease-reversetranscriptase                            | 1 | 19 |
| Tubulin-tyrosineligasefamily                                 | 1 | 0  |

|                                                   |   |    |
|---------------------------------------------------|---|----|
| Poly(ADP-ribose)polymerasecatalyticdomain         | 3 | 7  |
| DEAD/DEAHboxhelicase                              | 1 | 5  |
| Uncharacterizedalpha/betahydrolasedomain(DUF2235) | 1 | 7  |
| Acetyltransferase(GNAT)domain                     | 1 | 0  |
| RNA3'-terminalphosphatecyclase                    | 1 | 0  |
| GLEYAdomain                                       | 1 | 0  |
| Aminoacidpermease                                 | 1 | 3  |
| L-asparaginaseII                                  | 1 | 0  |
| Sodium:neurotransmittersymporterfamily            | 0 | 1  |
| Alpha-acetolactatedecarboxylase                   | 0 | 1  |
| RecQzinc-binding                                  | 0 | 3  |
| Histidinekinase-,DNAgyraseB-,andHSP90-likeATPase  | 0 | 5  |
| Glycosylhydrolasefamily1                          | 0 | 1  |
| MULEtransposasedomain                             | 0 | 86 |
| Bul1Cterminus                                     | 0 | 1  |
| Bromodomain                                       | 0 | 3  |
| E1-E2ATPase                                       | 0 | 1  |
| Mis12-Mtw1proteinfamily                           | 0 | 3  |
| N-terminaldomainofNWDNACHT-NTPase                 | 0 | 7  |
| Melibiase                                         | 0 | 1  |
| GlutathioneS-transferase,N-terminaldomain         | 0 | 1  |
| PEP-utilisingenzyme,PEP-bindingdomain             | 0 | 1  |
| RNaseH-likedomainfoundinreversetranscriptase      | 0 | 15 |
| Putativelumazine-binding                          | 0 | 1  |
| CoAbindingdomain                                  | 0 | 1  |
| Glycosylhydrolasefamily3C-terminaldomain          | 0 | 5  |
| Subtilasefamily                                   | 0 | 1  |
| Dihydrodipicolinatesynthetasefamily               | 0 | 1  |
| AlcoholdehydrogenaseGroES-likedomain              | 0 | 1  |
| Ringfingerdomain                                  | 0 | 1  |



|                                               |   |    |
|-----------------------------------------------|---|----|
| Chitinsynthase                                | 0 | 1  |
| Matrixin                                      | 0 | 1  |
| AcyclicterpeneutilisationfamilyproteinAtuA    | 0 | 1  |
| tRNAsynthetasesclassII(D,KandN)               | 0 | 1  |
| Dak1domain                                    | 0 | 1  |
| Zincfinger,C2H2type                           | 0 | 5  |
| Aldehydedehydrogenasefamily                   | 0 | 7  |
| GMCoxidoreductase                             | 0 | 1  |
| HelicaseconservedC-terminaldomain             | 0 | 5  |
| Sulfotransferasedomain                        | 0 | 3  |
| Integrasezincbindingdomain                    | 0 | 1  |
| Trypsin-likepeptidasedomain                   | 0 | 5  |
| Middleorthirddomainofpeptidase_M16            | 0 | 1  |
| Proteinofunknownfunction(DUF3435)             | 0 | 1  |
| Proteinkinasedomain                           | 0 | 19 |
| Proteinofunknownfunction(DUF659)              | 0 | 17 |
| Proteinofunknownfunction(DUF4246)             | 0 | 3  |
| Putativeserinedehydratasedomain               | 0 | 1  |
| Regulatorofchromosomecondensation(RCC1)repeat | 0 | 1  |
| ScaffoldproteinNfu/NifUNterminal              | 0 | 1  |
| AdoMetdependentprolinedi-methyltransferase    | 0 | 1  |
| Proteinofunknownfunction(DUF1275)             | 0 | 1  |
| CoenzymeAtransferase                          | 0 | 1  |
| CoA-transferasefamilyIII                      | 0 | 1  |
| PutativeFMN-bindingdomain                     | 0 | 1  |
| Ubiquitincooxyl-terminalhydrolase             | 0 | 1  |
| 26SproteasomesubunitRPN7                      | 0 | 1  |
| ABC-2typetransporter                          | 0 | 1  |
| Glycosyltransferasefamily28N-terminaldomain   | 0 | 1  |
| Domainofunknownfunction(DUF1989)              | 0 | 1  |

|                                                          |   |   |
|----------------------------------------------------------|---|---|
| ABCtransporter                                           | 0 | 3 |
| Alphaamylase,catalyticdomain                             | 0 | 1 |
| Frequencyclockprotein                                    | 0 | 5 |
| TctoxincomplexTcAC-terminalTcB-bindingdomain             | 0 | 1 |
| Caspasedomain                                            | 0 | 3 |
| bZIPtranscriptionfactor                                  | 0 | 3 |
| Phosphorylasesuperfamily                                 | 0 | 3 |
| ABCtransportertransmembraneregion                        | 0 | 1 |
| Las17-bindingproteinactinregulator                       | 0 | 1 |
| Egh16-likevirulencefactor                                | 0 | 1 |
| 3-oxo-5-alpha-steroid4-dehydrogenase                     | 0 | 1 |
| TCP-1/cpn60chaperoninfamily                              | 0 | 1 |
| Peroxidase,family2                                       | 0 | 1 |
| GDSL-likeLipase/Acylhydrolase                            | 0 | 1 |
| RTA1likeprotein                                          | 0 | 1 |
| Amidohydrolase                                           | 0 | 1 |
| MYNDFinger                                               | 0 | 1 |
| Proteinofunknownfunction(DUF2985)                        | 0 | 1 |
| Patatin-likephospholipase                                | 0 | 5 |
| Chromo(CHRromatinOrganisationMODifier)domain             | 0 | 5 |
| Pleckstrinhomologydomain                                 | 0 | 3 |
| ER-boundoxygenasempaB/B'/Rubberoxygenase,catalyticdomain | 0 | 1 |
| EsteraseFrsA-like                                        | 0 | 1 |
| BacterialsignallingproteinNterminalrepeat                | 0 | 1 |
| helix-turn-helix,Psqdomain                               | 0 | 7 |
| 3-beta-hydroxysteroiddehydrogenase/isomerasefamily       | 0 | 3 |
| Domainofunknownfunction(DUF1996)                         | 0 | 3 |
| Beta-lactamasesuperfamilydomain                          | 0 | 3 |
| Proteinofunknownfunction(DUF3533)                        | 0 | 1 |
| BTB/POZdomain                                            | 0 | 1 |

|                                                        |   |   |
|--------------------------------------------------------|---|---|
| Proteinofunknownfunction(DUF3716)                      | 0 | 9 |
| Beta-ketoacylsynthase,N-terminaldomain                 | 0 | 1 |
| Spherulation-specificfamily4                           | 0 | 1 |
| Fungalproteinofunknownfunction(DUF1752)                | 0 | 5 |
| Aldo/ketoreductasefamily                               | 0 | 1 |
| Reticulon                                              | 0 | 1 |
| GATAzincfinger                                         | 0 | 1 |
| Alginatase                                             | 0 | 1 |
| HSF-typeDNA-binding                                    | 0 | 1 |
| Ca <sup>2+</sup> regulatorandmembranefusionproteinFig1 | 0 | 1 |
| Dienelactonehydrolasefamily                            | 0 | 3 |
| HpcH/HpaIaldolase/citratasefamily                      | 0 | 1 |
| Integrasecoredomain                                    | 0 | 1 |
| Sulfatase                                              | 0 | 1 |
| Glycosylhydrolasesfamily43                             | 0 | 1 |
| Glycosylhydrolasesfamily28                             | 0 | 2 |
| SurvivalproteinSurE                                    | 0 | 1 |
| Myb-likeDNA-bindingdomain                              | 0 | 1 |
| Proteinofunknownfunction(DUF3429)                      | 0 | 1 |
| Zincknuckle                                            | 0 | 1 |
| OTT_1508-likedeaminate                                 | 0 | 1 |
| BacteriallowtemperaturerequirementAprotein(LtrA)       | 0 | 1 |
| UV-endonucleaseUvdE                                    | 0 | 1 |
| FtsJ-likemethyltransferase                             | 0 | 1 |
| Proteinphosphatase2AregulatoryBsubunit(B56family)      | 0 | 1 |
| Conservedhypotheticalprotein(DUF2461)                  | 0 | 1 |
| Pyridinenucleotide-disulphideoxidoreductase            | 0 | 3 |
| EutQ-likecupindomain                                   | 0 | 1 |
| FADdependentoxidoreductase                             | 0 | 1 |
| BEDzincfinger                                          | 0 | 1 |

|                                                      |   |   |
|------------------------------------------------------|---|---|
| Eukaryoticproteinofunknownfunction(DUF829)           | 0 | 3 |
| Glycosylhydrolasefamily45                            | 0 | 1 |
| vonWillebrandfactortypeAdomain                       | 0 | 1 |
| Proteinofunknownfunction(DUF2722)                    | 0 | 1 |
| Up-regulatedDuringSeptation                          | 0 | 1 |
| Amidase                                              | 0 | 1 |
| Meioticallyup-regulatedgenefamily                    | 0 | 3 |
| Enoyl-(Acylcarrierprotein)reductase                  | 0 | 1 |
| Extracellulartail,of10TMputativephosphatetransporter | 0 | 1 |
| NAD(P)-bindingRossmann-likedomain                    | 0 | 1 |
| Proteinofunknownfunction(DUF3455)                    | 0 | 1 |
| PAP2superfamily                                      | 0 | 1 |
| Linalooldehydratase/isomerase                        | 0 | 1 |
| Ferricreductaseliketranmembranecomponent             | 0 | 1 |
| PutativeERtransporter,6TM,N-terminal                 | 0 | 1 |
| Eukaryoticaspartylprotease                           | 0 | 1 |
| AminotransferaseclassIandII                          | 0 | 1 |
| Glycosylhydrolasefamily3Nterminaldomain              | 0 | 1 |
| Familyofunknownfunction(DUF6060)                     | 0 | 1 |
| SnoaL-likedomain                                     | 0 | 1 |
| OxidoreductaseNAD-bindingdomain                      | 0 | 1 |
| Globin                                               | 0 | 1 |
| Glycosylhydrolasesfamily32Cterminal                  | 0 | 1 |
