# Supplementary material for: In silico comparative genomic analysis unravels a new candidate protein arsenal specifically associated with Fusarium oxysporum f. sp. albedinis pathogenesis
Source: PubMed Central journal article supplement (PMC9646873; doi:10.1038/s41598-022-21858-1), 2022-11-09
Supplement: 41598_2022_21858_MOESM3_ESM.pdf [file 41598_2022_21858_MOESM3_ESM.pdf]

**Supplementary data 3-Table 1 : predicted secreted effectors of the analyzed formae speciales belonging to Fusarium oxysporum species complex.**

| Stains                          | Core-secretome                              |                                           |                                            |                                          | accessory-secretome                         |                                           |                                            |                                          | Unique-secretome                            |                                           |                                            |                                          |
|---------------------------------|---------------------------------------------|-------------------------------------------|--------------------------------------------|------------------------------------------|---------------------------------------------|-------------------------------------------|--------------------------------------------|------------------------------------------|---------------------------------------------|-------------------------------------------|--------------------------------------------|------------------------------------------|
|                                 | Cytoplasmic effectors with Unknown Function | Cytoplasmic effectors with known Function | Apoplastic effectors with Unknown Function | Apoplastic effectors with known Function | Cytoplasmic effectors with Unknown Function | Cytoplasmic effectors with known Function | Apoplastic effectors with Unknown Function | Apoplastic effectors with known Function | Cytoplasmic effectors with Unknown Function | Cytoplasmic effectors with known Function | Apoplastic effectors with Unknown Function | Apoplastic effectors with known Function |
| F.o.f.sp.apiiNRRL38295          | 162                                         | 547                                       | 31                                         | 49                                       | 777                                         | 608                                       | 215                                        | 101                                      | 37                                          | 33                                        | 7                                          | 3                                        |
| F.o.f.sp.coriaandrii3-2         | 154                                         | 536                                       | 31                                         | 51                                       | 770                                         | 623                                       | 232                                        | 106                                      | 2                                           | 0                                         | 11                                         | 2                                        |
| F.o.f.sp.coriaandriiGL306       | 160                                         | 543                                       | 34                                         | 54                                       | 797                                         | 636                                       | 231                                        | 102                                      | 5                                           | 1                                         | 1                                          | 0                                        |
| F.o.f.sp.vasinfectumLA1E        | 152                                         | 534                                       | 32                                         | 49                                       | 610                                         | 508                                       | 174                                        | 88                                       | 73                                          | 75                                        | 13                                         | 11                                       |
| F.o.f.sp.spinaciaeFus254        | 152                                         | 585                                       | 33                                         | 54                                       | 669                                         | 577                                       | 175                                        | 88                                       | 91                                          | 73                                        | 10                                         | 5                                        |
| F.o.f.sp.momordicae90NF2-1      | 159                                         | 559                                       | 31                                         | 52                                       | 613                                         | 542                                       | 195                                        | 99                                       | 10                                          | 1                                         | 1                                          | 0                                        |
| F.o.f.sp.momordicaeNRRL26413    | 139                                         | 514                                       | 35                                         | 50                                       | 639                                         | 561                                       | 196                                        | 92                                       | 4                                           | 1                                         | 0                                          | 23                                       |
| F.o.f.sp.lagenariae01-03008     | 138                                         | 552                                       | 31                                         | 51                                       | 683                                         | 556                                       | 200                                        | 90                                       | 79                                          | 34                                        | 7                                          | 3                                        |
| F.o.f.sp.fragariae160609        | 154                                         | 543                                       | 34                                         | 48                                       | 701                                         | 574                                       | 196                                        | 98                                       | 44                                          | 11                                        | 3                                          | 0                                        |
| F.o.f.sp.niveumR1               | 153                                         | 556                                       | 35                                         | 54                                       | 526                                         | 494                                       | 189                                        | 97                                       | 120                                         | 168                                       | 25                                         | 15                                       |
| F.o.f.sp.spinaciaeMF15          | 139                                         | 568                                       | 32                                         | 49                                       | 709                                         | 564                                       | 199                                        | 105                                      | 124                                         | 63                                        | 21                                         | 6                                        |
| F.o.f.sp.nicotianaefT-1512      | 159                                         | 528                                       | 37                                         | 49                                       | 607                                         | 505                                       | 182                                        | 98                                       | 68                                          | 22                                        | 7                                          | 4                                        |
| F.o.f.sp.vasinfectumNRRL31665   | 163                                         | 612                                       | 34                                         | 52                                       | 620                                         | 529                                       | 178                                        | 90                                       | 100                                         | 59                                        | 16                                         | 7                                        |
| F.o.f.sp.liliiFol39             | 152                                         | 574                                       | 34                                         | 43                                       | 612                                         | 538                                       | 181                                        | 93                                       | 100                                         | 50                                        | 19                                         | 9                                        |
| F.o.f.sp.fragariaeBRIP5168a     | 162                                         | 542                                       | 35                                         | 52                                       | 507                                         | 462                                       | 168                                        | 89                                       | 52                                          | 14                                        | 9                                          | 2                                        |
| F.o.f.sp.LagenariaeLag3-1       | 150                                         | 544                                       | 32                                         | 59                                       | 514                                         | 469                                       | 175                                        | 85                                       | 102                                         | 31                                        | 17                                         | 7                                        |
| F.o.f.sp.koae44                 | 159                                         | 538                                       | 33                                         | 47                                       | 401                                         | 399                                       | 138                                        | 79                                       | 83                                          | 20                                        | 13                                         | 7                                        |
| F.o.f.sp.conglutinans58385      | 153                                         | 513                                       | 33                                         | 50                                       | 884                                         | 652                                       | 212                                        | 113                                      | 3                                           | 0                                         | 73                                         | 32                                       |
| F.o.f.sp.conglutinansFGL03-6    | 153                                         | 510                                       | 36                                         | 54                                       | 765                                         | 664                                       | 174                                        | 105                                      | 45                                          | 4                                         | 3                                          | 0                                        |
| F.o.f.sp.conglutinansrace254008 | 142                                         | 533                                       | 36                                         | 52                                       | 786                                         | 610                                       | 212                                        | 108                                      | 5                                           | 2                                         | 0                                          | 36                                       |
| F.o.f.sp.melonisFom005          | 152                                         | 566                                       | 35                                         | 51                                       | 615                                         | 555                                       | 206                                        | 109                                      | 130                                         | 65                                        | 19                                         | 4                                        |
| F.o.f.sp.niveumFon002           | 151                                         | 544                                       | 37                                         | 49                                       | 602                                         | 534                                       | 198                                        | 97                                       | 128                                         | 58                                        | 18                                         | 7                                        |
| F.o.f.sp.cucumerinumFoc018      | 138                                         | 527                                       | 31                                         | 51                                       | 809                                         | 651                                       | 217                                        | 118                                      | 85                                          | 39                                        | 9                                          | 1                                        |
| F.o.f.sp.cucumerinumFoc030      | 142                                         | 574                                       | 34                                         | 54                                       | 803                                         | 659                                       | 221                                        | 111                                      | 80                                          | 32                                        | 5                                          | 4                                        |
| F.o.f.sp.Raphani54005           | 133                                         | 527                                       | 34                                         | 52                                       | 683                                         | 565                                       | 199                                        | 95                                       | 117                                         | 66                                        | 19                                         | 11                                       |
| F.o.f.sp.MelongenaeJ-71         | 159                                         | 582                                       | 34                                         | 52                                       | 567                                         | 503                                       | 171                                        | 94                                       | 117                                         | 67                                        | 16                                         | 13                                       |
| F.o.f.sp.pisiHDV247             | 159                                         | 520                                       | 33                                         | 54                                       | 668                                         | 552                                       | 184                                        | 113                                      | 104                                         | 63                                        | 10                                         | 8                                        |
| F.o.f.sp.liniF282               | 145                                         | 598                                       | 33                                         | 54                                       | 540                                         | 470                                       | 158                                        | 85                                       | 30                                          | 24                                        | 9                                          | 4                                        |
| F.o.f.sp.liniF324               | 157                                         | 547                                       | 37                                         | 58                                       | 525                                         | 468                                       | 157                                        | 95                                       | 43                                          | 27                                        | 10                                         | 3                                        |
| F.o.f.sp.cubense160527          | 170                                         | 548                                       | 32                                         | 58                                       | 428                                         | 474                                       | 167                                        | 86                                       | 198                                         | 63                                        | 46                                         | 10                                       |
| F.o.f.sp.ciceris38-1            | 146                                         | 541                                       | 29                                         | 46                                       | 437                                         | 490                                       | 153                                        | 67                                       | 338                                         | 126                                       | 57                                         | 23                                       |
| F.o.f.sp.gladioliG76            | 130                                         | 533                                       | 28                                         | 54                                       | 598                                         | 504                                       | 178                                        | 93                                       | 257                                         | 142                                       | 34                                         | 19                                       |

|                                     |     |     |    |    |      |     |     |     |     |     |    |    |
|-------------------------------------|-----|-----|----|----|------|-----|-----|-----|-----|-----|----|----|
| F.o.f.sp.lycopersiciFol014          | 153 | 545 | 31 | 51 | 666  | 510 | 176 | 100 | 3   | 1   | 0  | 47 |
| F.o.f.sp.lycopersiciFol074          | 142 | 546 | 31 | 51 | 711  | 581 | 184 | 111 | 26  | 8   | 2  | 0  |
| F.o.f.sp.Melonis26406               | 137 | 545 | 30 | 52 | 628  | 579 | 192 | 101 | 125 | 106 | 32 | 8  |
| F.o.f.sp.albedinis133               | 175 | 550 | 33 | 55 | 1120 | 639 | 208 | 129 | 71  | 18  | 3  | 2  |
| F.o.f.sp.albedinis9                 | 158 | 562 | 31 | 51 | 627  | 600 | 200 | 115 | 46  | 25  | 1  | 2  |
| F.o.f.sp.matthiolaePHW726           | 155 | 512 | 33 | 47 | 723  | 572 | 174 | 94  | 76  | 21  | 5  | 0  |
| F.o.f.sp.tulipaeTu67                | 151 | 526 | 32 | 49 | 696  | 546 | 164 | 105 | 103 | 71  | 16 | 5  |
| F.o.f.sp.apii207                    | 138 | 526 | 32 | 50 | 582  | 560 | 193 | 104 | 159 | 104 | 54 | 9  |
| F.o.f.sp.radicis-cucumerinumForc024 | 150 | 535 | 36 | 50 | 568  | 508 | 190 | 102 | 11  | 2   | 3  | 0  |
| F.o.f.sp.radicis-cucumerinumForc031 | 161 | 546 | 34 | 53 | 580  | 502 | 189 | 107 | 2   | 1   | 0  | 16 |
| F.o.f.sp.gladioliG2                 | 131 | 516 | 32 | 50 | 656  | 551 | 173 | 105 | 75  | 40  | 11 | 5  |
| F.o.f.sp.cepaeFoC125                | 149 | 549 | 32 | 47 | 694  | 619 | 191 | 100 | 3   | 1   | 0  | 14 |
| F.o.f.sp.cepaeFoCFus2               | 134 | 537 | 31 | 55 | 603  | 627 | 196 | 97  | 6   | 1   | 0  | 20 |
| F.o.f.sp.medicaginisFom-5190a       | 146 | 541 | 34 | 51 | 552  | 514 | 181 | 101 | 107 | 54  | 14 | 4  |
| F.o.f.sp.Radicis-lycopersici26381   | 157 | 535 | 33 | 48 | 549  | 456 | 172 | 98  | 112 | 50  | 14 | 7  |
| F.o.f.sp.nicotianaeFt-Rob           | 150 | 528 | 29 | 50 | 533  | 492 | 169 | 98  | 84  | 31  | 10 | 2  |
| F.o.f.sp.narcissiN139               | 142 | 560 | 30 | 49 | 738  | 668 | 209 | 111 | 93  | 54  | 6  | 2  |
| F.o.f.sp.narcissiNa5                | 150 | 532 | 29 | 52 | 778  | 584 | 212 | 111 | 91  | 48  | 12 | 5  |
| F.o.f.sp.cubenseC1HIR9889           | 174 | 579 | 35 | 60 | 334  | 359 | 135 | 73  | 251 | 109 | 57 | 12 |

**Supplementary data 3-Table 2 : predicted effector families of *Fusarium oxysporum*.f. sp. *albedinis* strains**

| Effectors families                                    | <i>Fusarium oxysporum</i> . f. sp. <i>albedinis</i> 133 | <i>Fusarium oxysporum</i> . f. sp. <i>albedinis</i> 9 |
|-------------------------------------------------------|---------------------------------------------------------|-------------------------------------------------------|
|                                                       | Effector count                                          | Effector count                                        |
| Thioredoxin                                           | 15                                                      | 5                                                     |
| Righthandedbetahelixregion                            | 5                                                       | 11                                                    |
| Glycosylhydrolasesfamily43                            | 15                                                      | 13                                                    |
| Fasciclindomain                                       | 7                                                       | 9                                                     |
| Subtilasefamily                                       | 12                                                      | 13                                                    |
| Glucanosyltransferase                                 | 1                                                       | 1                                                     |
| Thioredoxin-likedomain                                | 1                                                       | 1                                                     |
| DnaJCTerminaldomain                                   | 1                                                       | 17                                                    |
| GlutathioneS-transferase,N-terminaldomain             | 7                                                       | 5                                                     |
| DnaJdomain                                            | 11                                                      | 13                                                    |
| Tuberculosisnecrotizingtoxin                          | 1                                                       | 1                                                     |
| AuxiliaryActivityfamily9(formerlyGH61)                | 9                                                       | 3                                                     |
| Lyticpolysaccharidemono-oxygenase,cellulose-degrading | 3                                                       | 1                                                     |
| Glycosylhydrolasesfamily11                            | 5                                                       | 7                                                     |
| Pregnancy-associatedplasmaprotein-A                   | 3                                                       | 28                                                    |
| Bacterialextracellularsolute-bindingprotein           | 3                                                       | 17                                                    |
| Pectinesterase                                        | 8                                                       | 14                                                    |
| S1/P1Nuclease                                         | 1                                                       | 7                                                     |
| GlucosidaseIbetasubunit-likeprotein                   | 3                                                       | 3                                                     |
| Autophagy-relatedprotein27                            | 1                                                       | 13                                                    |
| Glycosylhydrolasesfamily28                            | 9                                                       | 3                                                     |
| Pectatelyase                                          | 27                                                      | 9                                                     |
| Glycosylhydrolasesfamily16                            | 18                                                      | 5                                                     |
| GDSL-likeLipase/Acylhydrolasefamily                   | 13                                                      | 1                                                     |
| Phosphoesterasefamily                                 | 1                                                       | 8                                                     |
| Polysaccharidedeacetylase                             | 7                                                       | 6                                                     |
| Trypsin                                               | 3                                                       | 1                                                     |
| Fungalhydrophobin                                     | 5                                                       | 11                                                    |
| 60sAcidicribosomalprotein                             | 1                                                       | 9                                                     |
| EsterasePHBdepolymerase                               | 5                                                       | 1                                                     |
| Asparaginase                                          | 3                                                       | 3                                                     |
| emp24/gp25L/p24family/GOLD                            | 7                                                       | 5                                                     |
| Cerato-platanin                                       | 7                                                       | 3                                                     |
| SUR7/PalIfamily                                       | 1                                                       | 1                                                     |
| Necrosisinducingprotein(NPP1)                         | 7                                                       | 1                                                     |
| Pathogeneffector putativenecrosis-inducingfactor      | 3                                                       | 3                                                     |
| FKBP-typepeptidyl-prolylcis-transisomerase            | 3                                                       | 1                                                     |

|                                                          |    |    |
|----------------------------------------------------------|----|----|
| Hsp70protein                                             | 1  | 5  |
| Lipase(class3)                                           | 1  | 19 |
| Inorganicpyrophosphatase                                 | 1  | 1  |
| PeptidasefamilyM28                                       | 1  | 1  |
| CFEMdomain                                               | 9  | 5  |
| Glycosyltransferasesugar-bindingregioncontainingDXDmotif | 1  | 1  |
| LicDfamily                                               | 3  | 1  |
| Alternariaalternataallergen1                             | 1  | 1  |
| CHRDdomain                                               | 1  | 1  |
| Cysteine-richsecretoryproteinfamily                      | 18 | 1  |
| ElectrontransferDM13                                     | 1  | 1  |
| ribonuclease                                             | 17 | 3  |
| Glycoside-hydrolasefamilyGH114                           | 5  | 1  |
| NucleotideexchangefactorSIL1                             | 1  | 7  |
| Histidinephosphatasesuperfamily(branch1)                 | 5  | 1  |
| Zinccarboxypeptidase                                     | 3  | 7  |
| HydrophobicsurfacebindingproteinA                        | 1  | 1  |
| MLdomain                                                 | 1  | 1  |
| Glycerophosphoryldiesterphosphodiesterasefamily          | 1  | 1  |
| WSCdomain                                                | 7  | 1  |
| EndoplasmicReticulumOxidoreductin1(ERO1)                 | 1  | 5  |
| Histidinephosphatasesuperfamily(branch2)                 | 1  | 3  |
| Glycosylhydrolasefamily45                                | 1  | 6  |
| Alpha-L-arabinofuranosidaseB,catalytic                   | 1  | 3  |
| Glycosylhydrolasefamily7                                 | 3  | 1  |
| LysMdomain                                               | 9  | 5  |
| PANdomain                                                | 6  | 1  |
| Putativenuclearenvelopeorganisationprotein               | 1  | 7  |
| Platelet-activatingfactoracetylhydrolase,isoformII       | 1  | 1  |
| Phagelysozyme                                            | 3  | 1  |
| Cupin                                                    | 17 | 1  |
| Proteinofunknownfunction(DUF3455)                        | 3  | 3  |
| EthDdomain                                               | 5  | 3  |
| Aldo/ketoreductasefamily                                 | 11 | 1  |
| Glycosidehydrolase131catalyticN-terminaldomain           | 1  | 7  |
| Glycosylhydrolasefamily12                                | 7  | 1  |
| Phospholipase/Carboxylesterase                           | 1  | 1  |
| Alginatylase                                             | 1  | 1  |
| ChorismatemutasetypeII                                   | 1  | 1  |
| Astacin(PeptidasefamilyM12A)                             | 5  | 1  |

|                                                             |    |    |
|-------------------------------------------------------------|----|----|
| Eukaryoticaspartylprotease                                  | 3  | 5  |
| Familyofunknownfunction(DUF6060)                            | 1  | 1  |
| FADdependentoxidoreductase                                  | 3  | 1  |
| Egh16-likevirulencefactor                                   | 7  | 1  |
| Cutinase                                                    | 5  | 1  |
| Glycosylhydrolasefamily10                                   | 1  | 7  |
| SMP-30/Gluconolactonase/LRE-likeregion                      | 3  | 3  |
| Proteinofunknownfunction(DUF3237)                           | 5  | 1  |
| ExpansinC-terminaldomain                                    | 1  | 3  |
| Translocon-associatedprotein(TRAP),alphasubunit             | 1  | 1  |
| CHAPdomain                                                  | 1  | 9  |
| Glycosylhydrolasesfamily18                                  | 7  | 3  |
| Spt4/RpoE2zincfinger                                        | 1  | 1  |
| Nis1family                                                  | 1  | 1  |
| Pro-kumamolisin,activationdomain                            | 1  | 5  |
| TrypsinInhibitorlikecysteinerichdomain                      | 1  | 1  |
| Calreticulinfamily                                          | 1  | 1  |
| Dienelactonehydrolasefamily                                 | 5  | 4  |
| Glycosyltransferasefamily17                                 | 1  | 1  |
| Fungalchitosanaseofglycosylhydrolasegroup75                 | 1  | 5  |
| RapidALKalinizationFactor(RALF)                             | 1  | 1  |
| GLEYAdomain                                                 | 1  | 5  |
| Chitinrecognitionprotein                                    | 1  | 1  |
| SurvivalproteinSurE                                         | 1  | 1  |
| Glycosylhydrolasefamily62                                   | 1  | 0  |
| Cyclophilintypepeptidyl-prolylcis-transisomerase/CLD        | 5  | 1  |
| RibonucleaseT2family                                        | 1  | 1  |
| PBPsuperfamilydomain                                        | 1  | 5  |
| Rieske[2Fe-2S]domain                                        | 0  | 1  |
| Beta-glucosidase(SUNfamily)                                 | 1  | 13 |
| ProkaryoticphospholipaseA2                                  | 3  | 27 |
| Phosphatidylethanolamine-bindingprotein                     | 1  | 1  |
| PeptidaseA4family                                           | 1  | 3  |
| Tc5transposaseDNA-bindingdomain                             | 24 | 17 |
| hATfamilyC-terminaldimerisationregion                       | 15 | 1  |
| Nse4C-terminal                                              | 1  | 1  |
| D-isomerspecific2-hydroxyaciddehydrogenase,NADbindingdomain | 3  | 1  |
| Ubiquitin-bindingdomain                                     | 1  | 1  |
| C2HE/C2H2/C2HCzinc-bindingfinger                            | 1  | 1  |
| OxidoreductaseNAD-bindingdomain                             | 3  | 1  |

|                                                           |    |    |
|-----------------------------------------------------------|----|----|
| Proteinprenyltransferasealphasubunitrepeat                | 1  | 1  |
| Actincytoskeleton-regulatorycomplexproteinEND3            | 1  | 1  |
| Zincfinger,C2H2type                                       | 13 | 1  |
| RibosomalS13/S15N-terminaldomain                          | 1  | 1  |
| Synaptobrevin                                             | 3  | 3  |
| PPIC-typePPIASEdomain                                     | 1  | 1  |
| Cofilin/tropomyosin-typeactin-bindingprotein              | 7  | 1  |
| UncharacterizedproteinfamilyUPF0029                       | 1  | 1  |
| EF-handdomainpair                                         | 7  | 1  |
| Pre-mRNAsplicingfactor                                    | 1  | 1  |
| Domainofunknownfunction(DUF4187)                          | 1  | 1  |
| RibosomalproteinL4/L1family                               | 1  | 1  |
| TFA2Wingedhelixdomain2                                    | 1  | 7  |
| Velvetfactor                                              | 1  | 1  |
| Signalpeptidasesubunit                                    | 1  | 1  |
| 3-hydroxyacyl-CoAdehydrogenase,NADbindingdomain           | 1  | 3  |
| Cullinbinding                                             | 1  | 1  |
| RibosomalproteinS5,C-terminaldomain                       | 1  | 1  |
| CSLzincfinger                                             | 3  | 1  |
| SWIB/MDM2domain                                           | 1  | 1  |
| MannitoldehydrogenaseC-terminaldomain                     | 1  | 1  |
| Ribosome-associatedcomplexheaddomain                      | 1  | 3  |
| Galactose-1-phosphateuridylyltransferase,N-terminaldomain | 1  | 1  |
| 2Fe-2Siron-sulfurclusterbindingdomain                     | 1  | 1  |
| RNApolymeraseIIsubunitRpc25                               | 1  | 1  |
| CDK-activatingkinaseassemblyfactorMAT1                    | 1  | 1  |
| Ribosomal_S17N-terminal                                   | 1  | 7  |
| JAB1/Mov34/MPN/PAD-1ubiquitinprotease                     | 1  | 16 |
| ATPasefamilyassociatedwithvariouscellularactivities(AAA)  | 7  | 1  |
| Coiled-coildomaincontainingprotein(DUF2052)               | 1  | 1  |
| Acyl-CoAdehydrogenase,C-terminaldomain                    | 1  | 1  |
| Zinc-binding                                              | 7  | 1  |
| WDdomain,G-betarepeat                                     | 1  | 1  |
| Multiproteinbridgingfactor1                               | 1  | 7  |
| Cytokine-inducedanti-apoptosisinhibitor1,Fe-Sbiogenesis   | 1  | 3  |
| Aft1HRRdomain                                             | 1  | 3  |
| bZIPtranscriptionfactor                                   | 16 | 1  |
| RibosomalfamilyS4e                                        | 1  | 1  |
| Ubiquitincooxyl-terminalhydrolase                         | 3  | 3  |
| NucleotideexchangeefactorFes1                             | 1  | 1  |

|                                                           |    |   |
|-----------------------------------------------------------|----|---|
| Pyridoxine5'-phosphateoxidaseC-terminaldimerisationregion | 1  | 1 |
| ATPsynthasesubunitC                                       | 1  | 1 |
| TranscriptioninitiationfactorIIA,gammasubunit             | 1  | 1 |
| PP-loopfamily                                             | 1  | 5 |
| Proteasomesubunit                                         | 1  | 1 |
| RPELrepeat                                                | 1  | 1 |
| Sof1-likedomain                                           | 1  | 5 |
| 2OG-Fe(II)oxygenasesuperfamily                            | 9  | 1 |
| Ubiquitin-conjugatingenzyme                               | 22 | 1 |
| Nucleoporincomplexsubunit54                               | 1  | 7 |
| RibosomalproteinL6                                        | 3  | 1 |
| EB1-likeC-terminalmotif                                   | 1  | 1 |
| RibosomalProteinsL2,C-terminaldomain                      | 3  | 1 |
| CHORD                                                     | 1  | 1 |
| ReplicationfactorCC-terminaldomain                        | 1  | 1 |
| Glutathione-dependentformaldehyde-activatingenzyme        | 15 | 1 |
| IEC3subunitoftheIno80complex,chromatinre-modelling        | 1  | 1 |
| AN1-likeZincfinger                                        | 3  | 1 |
| Nuf2family                                                | 1  | 1 |
| TranscriptionfactorTFIIBrepeat                            | 1  | 3 |
| F-boxonlyproteinC-terminalregion                          | 1  | 1 |
| TranscriptionfactorTFIIDcomplexsubunit8C-term             | 1  | 1 |
| Uricase                                                   | 1  | 7 |
| NIPSNAP                                                   | 1  | 1 |
| Calcineurin-likephosphoesterase                           | 3  | 1 |
| CTDkinasesubunitgammaCTK3                                 | 1  | 1 |
| DEAD/DEAHboxhelicase                                      | 3  | 1 |
| Gelsolinrepeat                                            | 1  | 1 |
| C-terminusofhistoneH2A                                    | 1  | 1 |
| R3Hdomain                                                 | 1  | 1 |
| Rasfamily                                                 | 25 | 1 |
| SBDSproteinC-terminaldomain                               | 1  | 1 |
| Chromoshadowdomain                                        | 3  | 1 |
| EF-1guaninenucleotideexchangedomain                       | 1  | 1 |
| 2-oxoaciddehydrogenasesacyltransferase(catalyticdomain)   | 1  | 1 |
| HSCBC-terminaloligomerisationdomain                       | 1  | 1 |
| RibosomalproteinL7Ae/L30e/S12e/Gadd45family               | 1  | 3 |
| SWIRMdomain                                               | 1  | 1 |
| Zinc-fingerdouble-strandedRNA-binding                     | 3  | 3 |
| Lowmolecularweightphosphotyrosineproteinphosphatase       | 1  | 1 |

|                                                             |    |    |
|-------------------------------------------------------------|----|----|
| Nucleotidyltransferase                                      | 1  | 1  |
| Acetyltransferase(GNAT)family                               | 35 | 1  |
| BTB/POZdomain                                               | 15 | 1  |
| DSS1/SEM1family                                             | 1  | 1  |
| PXdomain                                                    | 3  | 21 |
| ARP2/3complex20kDasubunit(ARPC4)                            | 1  | 1  |
| Peroxidase,family2                                          | 5  | 1  |
| Cupindomain                                                 | 13 | 1  |
| Nucleartransportfactor2(NTF2)domain                         | 1  | 1  |
| MafB19-likedeaminase                                        | 1  | 1  |
| Shikimatekinase                                             | 1  | 1  |
| YqcI/YcgGfamily                                             | 1  | 1  |
| RibosomalproteinL21e                                        | 1  | 3  |
| RNApolymeraseRpb8                                           | 1  | 1  |
| ComplexIintermediate-associatedprotein30(CIA30)             | 1  | 1  |
| Tim44-likedomain                                            | 1  | 9  |
| NFACTproteinRNAbindingdomain                                | 1  | 1  |
| RibosomalproteinS7e                                         | 1  | 3  |
| MYNDfinger                                                  | 3  | 1  |
| SURF1family                                                 | 1  | 1  |
| Domainofunknownfunction(DUF4452)                            | 1  | 1  |
| RibosomalS3Aefamily                                         | 1  | 3  |
| Hptdomain                                                   | 1  | 1  |
| Grap2andcyclin-D-interacting                                | 1  | 1  |
| AKAP72'5'RNAligase-likedomain                               | 1  | 1  |
| Rtf2RING-finger                                             | 1  | 1  |
| TranscriptionfactorS-II(TFIIS)                              | 3  | 3  |
| Sin3bindingregionofhistonedecetylasecomplexsubunitSAP30     | 1  | 3  |
| Familyofunknownfunction(DUF5308)                            | 1  | 1  |
| Proteolipidmembranepotentialmodulator                       | 1  | 7  |
| RibonucleaseIIIdomain                                       | 1  | 1  |
| Heatshockfactorbindingprotein1                              | 1  | 3  |
| CobW/HypB/UreG,nucleotide-bindingdomain                     | 1  | 1  |
| Peptidyl-tRNAhydrolasePTH2                                  | 1  | 1  |
| Pyoverdine/dityrosinebiosynthesisprotein                    | 1  | 13 |
| Autophagy-relatedprotein101                                 | 1  | 3  |
| NADH-ubiquinoneoxidoreductaseB18subunit(NDUFB7)             | 1  | 3  |
| Putativeamidoligaseenzyme                                   | 1  | 1  |
| Histone-liketranscriptionfactor(CBF/NF-Y)andarchaealhistone | 11 | 7  |
| Ringhydroxylatingalphasubunit(catalyticdomain)              | 1  | 1  |



|                                                |    |    |
|------------------------------------------------|----|----|
| IGRproteinmotif                                | 1  | 1  |
| GlycinecleavageH-protein                       | 3  | 1  |
| Rtr1/RPAP2family                               | 1  | 1  |
| Putativeheavy-metal-binding                    | 1  | 15 |
| ERproteinPkr1                                  | 1  | 1  |
| Alpha/betahydrolasefamily                      | 5  | 11 |
| Dephospho-CoAkinase                            | 1  | 11 |
| D-mannosebindinglectin                         | 1  | 15 |
| CSdomain                                       | 1  | 1  |
| Helix-loop-helixDNA-bindingdomain              | 19 | 45 |
| A49-likeRNAPolymeraseIassociatedfactor         | 1  | 7  |
| Familyofunknownfunction(DUF5572)               | 1  | 3  |
| GDSL-likeLipase/Acylhydrolase                  | 15 | 1  |
| Tim10/DDPfamilyzincfinger                      | 5  | 1  |
| NAD(P)H-binding                                | 3  | 1  |
| SKIP/SNWdomain                                 | 1  | 1  |
| RibosomalproteinS21e                           | 1  | 5  |
| RibosomalproteinL14p/L23e                      | 3  | 1  |
| shortchaindehydrogenase                        | 32 | 1  |
| Peptidemethioninesulfoxidereductase            | 1  | 1  |
| Oxidoreductasefamily,NAD-bindingRossmannfold   | 7  | 1  |
| Rhodanese-likedomain                           | 7  | 1  |
| RNAPolymeraseIspecificinitiationfactor         | 1  | 1  |
| ETCcomplexIsubunitconservedregion              | 3  | 1  |
| TaurinecatabolismdioxygenaseTauD,TfdAfamily    | 3  | 24 |
| Clathrinlightchain                             | 1  | 11 |
| Serineaminopeptidase,S33                       | 1  | 5  |
| RibosomalproteinL22p/L17e                      | 3  | 1  |
| RibosomalproteinL16p/L10e                      | 3  | 1  |
| ATPsynthasedelta(OSCP)subunit                  | 1  | 1  |
| Alanineracemase,N-terminaldomain               | 1  | 11 |
| Ribosomerecyclingfactor                        | 1  | 1  |
| RibosomalproteinL36                            | 3  | 3  |
| RNAPolymerasesN/8kDasubunit                    | 1  | 1  |
| RibosomalproteinS18                            | 1  | 1  |
| Lysinemethyltransferase                        | 1  | 1  |
| Interferon-relateddevelopmentalregulator(IFRD) | 1  | 5  |
| Cytochromeb5-likeHeme/Steroidbindingdomain     | 7  | 1  |
| Cupinsuperfamily(DUF985)                       | 1  | 1  |
| TranscriptionalCoactivatorp15(PC4)             | 1  | 1  |

|                                                        |   |    |
|--------------------------------------------------------|---|----|
| Mitochondriallargesubunitribosomalprotein(Img2)        | 1 | 1  |
| RibosomalproteinL44                                    | 1 | 1  |
| DSBA-likethioredoxindomain                             | 1 | 1  |
| PredictedSAM-dependentRNAmethyltransferase             | 1 | 1  |
| 25SrRNA(adenine(2142)-N(1))-methyltransferase,Bmt2     | 1 | 5  |
| Fungalproteinofunknownfunction(DUF2015)                | 1 | 1  |
| Mis12protein                                           | 1 | 1  |
| Proteinofunknownfunction(DUF3767)                      | 1 | 5  |
| Myb-likeDNA-bindingdomain                              | 9 | 1  |
| tRNAsynthetasesclassI(WandY)                           | 1 | 1  |
| SAMdomain(Sterilealphamotif)                           | 1 | 3  |
| Thioesterase-likesuperfamily                           | 5 | 1  |
| NifU-likeNterminaldomain                               | 1 | 1  |
| HORMAdomain                                            | 1 | 1  |
| Aldose1-epimerase                                      | 1 | 1  |
| PETassemblyofcytochromecoxidase,mitochondrial          | 1 | 3  |
| Vacuolar(H <sup>+</sup> )-ATPaseGsubunit               | 1 | 1  |
| Uncharacterisedproteinfamily(UPF0203)                  | 1 | 1  |
| RNApolymeraseIItranscriptionmediatorcomplexsubunit9    | 1 | 1  |
| CBP4                                                   | 1 | 1  |
| RibosomalproteinL24e                                   | 1 | 1  |
| Redoxin                                                | 3 | 3  |
| HDdomain                                               | 3 | 37 |
| Copper/zincsuperoxidedismutase(SODC)                   | 3 | 11 |
| SPFHdomain/Band7family                                 | 1 | 3  |
| Cnl2/NKP2familyprotein                                 | 1 | 7  |
| Uncharacterizedconservedprotein                        | 1 | 3  |
| RibosomalproteinL30p/L7e                               | 1 | 1  |
| 6-O-methylguanineDNAmethyltransferase,DNAbindingdomain | 3 | 1  |
| DNApolymerasedelta,subunit4                            | 1 | 1  |
| Prefoldinsubunit                                       | 5 | 3  |
| Cwf15/Cwc15cellcyclecontrolprotein                     | 1 | 1  |
| Familyofunknownfunction(DUF5321)                       | 1 | 1  |
| RibosomalproteinS10p/S20e                              | 1 | 1  |
| MitochondrialribosomalproteinL31                       | 1 | 1  |
| Gamma-glutamylcyclotransferase,AIG2-like               | 3 | 9  |
| Transcriptionalregulationofmitochondrialrecombination  | 1 | 1  |
| HomeoboxKNdomain                                       | 1 | 1  |
| RNasePsubunitPop3                                      | 1 | 28 |
| RibosomalproteinS7p/S5e                                | 3 | 1  |

|                                                       |    |   |
|-------------------------------------------------------|----|---|
| Lowtemperatureviabilityprotein                        | 1  | 3 |
| GDP/GTPexchangefactorSec2p                            | 1  | 1 |
| CytochromecoxidasesubunitVa                           | 1  | 1 |
| NLIinteractingfactor-likephosphatase                  | 1  | 1 |
| RibosomalproteinS9/S16                                | 1  | 1 |
| Pyridoxamine5'-phosphateoxidaselike                   | 1  | 1 |
| Extracellularmutantprotein11                          | 1  | 1 |
| Large-conductancemechanosensitivechannel,MscL         | 1  | 1 |
| Leucine-richrepeat                                    | 1  | 1 |
| Non-classicalexportprotein1                           | 1  | 1 |
| Spc24subunitofNdc80                                   | 1  | 1 |
| S4domain                                              | 1  | 1 |
| EndoribonucleaseL-PSP                                 | 15 | 1 |
| Lateendosomal/lysosomaladaptorandMAPKandMTORactivator | 1  | 1 |
| MED7protein                                           | 1  | 5 |
| Proteinofunknownfunction(DUF1168)                     | 1  | 1 |
| RNAsePRpr2/Rpp21/SNM1subunitdomain                    | 1  | 1 |
| RibosomalproteinL31e                                  | 1  | 1 |
| PCIdomain                                             | 1  | 1 |
| RegulatorofVps4activityintheMVBpathway                | 1  | 1 |
| Methyltransferasedomain                               | 25 | 7 |
| Shortcoiled-coilprotein                               | 7  | 1 |
| Initiationfactor2subunitfamily                        | 1  | 1 |
| SNOglutamineamidotransferasefamily                    | 1  | 3 |
| CTLH/CRAC-terminaltoLisHmotifdomain                   | 1  | 1 |
| CatalyticLigBsubunitofaromaticring-openingdioxygenase | 1  | 1 |
| Autophagyprotein16(ATG16)                             | 1  | 1 |
| Guanylatekinase                                       | 3  | 1 |
| Thioesterasedomain                                    | 1  | 1 |
| Peptidyl-tRNAhydrolase                                | 3  | 1 |
| Chalconeisomeraselike                                 | 1  | 1 |
| RibosomalproteinL13                                   | 3  | 1 |
| DJ-1/PfpIfamily                                       | 1  | 1 |
| CHCHdomain                                            | 1  | 3 |
| SCO1/SenC                                             | 1  | 1 |
| Complex1_LYR-like                                     | 5  | 1 |
| Pyridoxamine5'-phosphateoxidase                       | 5  | 1 |
| Sir2family                                            | 1  | 1 |
| SelRdomain                                            | 1  | 1 |
| Whi5like                                              | 3  | 1 |

|                                                   |    |    |
|---------------------------------------------------|----|----|
| TranscriptionfactorsubunitMed10ofMediatorcomplex  | 1  | 1  |
| RNApolymeraseRpb6                                 | 1  | 1  |
| MitochondrialribosomalproteinL51/S25/CI-B8domain  | 3  | 1  |
| Domainofunknownfunction(DUF4748)                  | 1  | 3  |
| Proteinofunknownfunction(DUF3602)                 | 5  | 1  |
| Magobinding                                       | 1  | 1  |
| RibosomalproteinS8e                               | 1  | 1  |
| ERCC4domain                                       | 1  | 15 |
| RNApolymeraseRpb4                                 | 1  | 1  |
| RNArecognitionmotif.(a.k.a.RRM,RBD,orRNPdomain)   | 11 | 1  |
| G-patchdomain                                     | 3  | 1  |
| Cytochromec/c1hemelyase                           | 1  | 1  |
| Nucleotide-diphospho-sugartransferase             | 1  | 1  |
| Murligasemiddledomain                             | 1  | 1  |
| UBXdomain                                         | 1  | 1  |
| MitochondrialribosomalproteinsubunitL20           | 1  | 1  |
| Isocitrate/isopropylmalatedehydrogenase           | 1  | 3  |
| R3H-associatedN-terminaldomain                    | 1  | 1  |
| Mitochondrial18KDaprotein(MTP18)                  | 1  | 5  |
| Translationinitiationfactor1A/IF-1                | 1  | 3  |
| She9/Mdm33family                                  | 1  | 1  |
| Sas10/Utp3/C1Dfamily                              | 1  | 1  |
| U-boxdomain                                       | 1  | 1  |
| TIM21                                             | 1  | 3  |
| Iron-sulfurclusterassemblyprotein                 | 1  | 12 |
| BindingdomainofDNArepairproteinErcc1(rad10/Swi10) | 1  | 1  |
| DehydrogenaseE1component                          | 1  | 1  |
| Las17-bindingproteinactinregulator                | 1  | 1  |
| Breastcarcinomaamplifiedsequence2(BCAS2)          | 1  | 1  |
| Hyaluronan/mRNAbindingfamily                      | 1  | 3  |
| DNLzincfinger                                     | 1  | 1  |
| MitochondrialexportproteinSom1                    | 1  | 1  |
| RibosomalproteinL34e                              | 1  | 1  |
| MitochondrialimportreceptorsubunitTom22           | 1  | 1  |
| YEATSfamily                                       | 1  | 1  |
| CytochromeCoxidasecopperchaperone(COX17)          | 1  | 1  |
| Spc19                                             | 1  | 1  |
| RibosomalproteinS16                               | 1  | 1  |
| PLAC8family                                       | 1  | 1  |
| Acetyltransferase(GNAT)domain                     | 5  | 1  |

|                                               |    |   |
|-----------------------------------------------|----|---|
| Domainofunknownfunction(DUF1993)              | 3  | 1 |
| SWIMzincfinger                                | 1  | 1 |
| ARP2/3complexARPC3(21kDa)subunit              | 1  | 1 |
| RibosomalproteinS19                           | 3  | 7 |
| Dihydroneopterinaldolase                      | 1  | 1 |
| alpha/betahydrolasefold                       | 7  | 1 |
| Conidiationprotein6                           | 3  | 1 |
| Nnf1                                          | 1  | 1 |
| Rdxfamily                                     | 1  | 1 |
| GGLdomain                                     | 1  | 9 |
| UBA-likedomain                                | 1  | 1 |
| Mitochondrial39-SribosomalproteinL47(MRP-L47) | 1  | 1 |
| Yqey-likeprotein                              | 1  | 3 |
| RibosomalproteinL23                           | 1  | 1 |
| 39SribosomalproteinL53/MRP-L53                | 1  | 1 |
| Splicingfactor3Bsubunit10(SF3b10)             | 1  | 1 |
| Ribosome-assemblyprotein3                     | 1  | 1 |
| CSN8/PSMD8/EIF3Kfamily                        | 3  | 1 |
| THUMPdomain                                   | 1  | 3 |
| Erv1/Alrfamily                                | 1  | 1 |
| Proteinkinasedomain                           | 11 | 1 |
| Domainofunknownfunction(DUF1917)              | 1  | 1 |
| Ubiquitincarboxyl-terminalhydrolase,family1   | 1  | 1 |
| UncharacterisedACR,YggUfamilyCOG1872          | 1  | 1 |
| CUEdomain                                     | 1  | 1 |
| Ribosomalproteins50S-L18Ae/60S-L20/60S-L18A   | 1  | 5 |
| HYPKUBAdomain                                 | 1  | 1 |
| ATPsynthase                                   | 17 | 1 |
| Pet100                                        | 1  | 3 |
| UncharacterisedproteinfamilyUPF0047           | 1  | 3 |
| Zinc-fingerdomain                             | 1  | 5 |
| RibosomalproteinL1p/L10efamily                | 3  | 1 |
| G10protein                                    | 1  | 1 |
| RNApolymeraseRpb3/Rpb11dimerisationdomain     | 3  | 1 |
| CVNHdomain                                    | 3  | 1 |
| ECL1/2/3zincbindingproteins                   | 3  | 1 |
| Glucose-repressibleproteinGrg1                | 5  | 1 |
| 4'-phosphopantetheinyltransferasesuperfamily  | 1  | 1 |
| ConservedhypotheticalATPbindingprotein        | 1  | 3 |
| RibosomalproteinL6e                           | 1  | 1 |

|                                             |   |   |
|---------------------------------------------|---|---|
| RibosomalL29protein                         | 1 | 1 |
| HCNGP-likeprotein                           | 1 | 1 |
| Proteinofunknownfunction(DUF3712)           | 1 | 1 |
| PHD-finger                                  | 1 | 1 |
| PeptidaseinhibitorI78family                 | 1 | 1 |
| TranslationmachineryassociatedTMA7          | 1 | 1 |
| DNA-directedRNAPolymerase,7kDa subunit      | 1 | 1 |
| Coiled-coildomain-containingprotein56       | 1 | 1 |
| Sds3-like                                   | 1 | 1 |
| FungalZn(2)-Cys(6)binuclearclusterdomain    | 5 | 3 |
| Exonuclease                                 | 1 | 1 |
| Ankyrinrepeats(manycopies)                  | 3 | 1 |
| Vacuolarimportanddegradationprotein         | 1 | 1 |
| RibosomalproteinS11                         | 1 | 1 |
| NADARdomain                                 | 1 | 1 |
| LSMdomain                                   | 9 | 1 |
| Phytanoyl-CoA dioxygenase(PhyH)             | 1 | 1 |
| Oxidoreductase-likeprotein,N-terminal       | 1 | 1 |
| Alternativeoxidase                          | 1 | 1 |
| Adenylatekinase                             | 1 | 1 |
| Adenylylsulphatekinase                      | 1 | 1 |
| Modifierofrudimentary(Mod(r))protein        | 1 | 1 |
| Ubiquitin-2likeRad60SUMO-like               | 1 | 1 |
| Complex1protein(LYRfamily)                  | 7 | 1 |
| Flavoprotein                                | 3 | 1 |
| SCP-2steroltransferfamily                   | 1 | 3 |
| CytochromecoxidasebiogenesisproteinCmc1like | 3 | 5 |
| RibosomalproteinL17                         | 1 | 1 |
| Mitochondrialimport2                        | 1 | 1 |
| Mitochondrialribosomal subunitprotein       | 1 | 1 |
| Tctex-1family                               | 1 | 1 |
| RibosomalL28family                          | 1 | 1 |
| Disorderedregionofunknownfunction(DUF5315)  | 1 | 9 |
| RibosomalproteinS12/S23                     | 1 | 1 |
| Mo25-like                                   | 1 | 1 |
| Bromodomain                                 | 5 | 1 |
| ProteasomematurationfactorUMP1              | 1 | 1 |
| Basicregionleucinezipper                    | 7 | 7 |
| FAM192A/Fyv6,N-terminaldomain               | 1 | 1 |
| Glutaredoxin                                | 1 | 1 |

|                                                       |   |    |
|-------------------------------------------------------|---|----|
| Hsp20/alphacrystallinfamily                           | 7 | 1  |
| CentromereproteinH(CENP-H)                            | 1 | 5  |
| MitochondrialATPsynthaseBchainprecursor(ATP-synt_B)   | 1 | 1  |
| CBF/Mak21family                                       | 1 | 1  |
| CCAAT-bindingtranscriptionfactor(CBF-B/NF-YA)subunitB | 1 | 1  |
| DASHcomplexsubunitDad4                                | 1 | 1  |
| Profilin                                              | 1 | 1  |
| CytochromecoxidaseassemblyproteinCOX16                | 1 | 3  |
| Ribonucleotidereductaseinhibitor                      | 1 | 1  |
| Translationmachinery-associatedprotein16              | 1 | 1  |
| Mitochondrialglycoprotein                             | 1 | 5  |
| Carbonicanhydrase                                     | 5 | 1  |
| FADbindingdomain                                      | 5 | 1  |
| Gammainterferoninduciblelysosomalthiolreductase(GILT) | 1 | 1  |
| HITdomain                                             | 1 | 1  |
| TAP42-likefamily                                      | 1 | 1  |
| DASHcomplexsubunitAsk1                                | 1 | 1  |
| 5-formyltetrahydrofolatecyclo-ligasefamily            | 1 | 1  |
| TranslationinitiationfactorIF-3,C-terminaldomain      | 1 | 1  |
| Proteinofunknownfunction(DUF1115)                     | 1 | 1  |
| BCCIP                                                 | 1 | 1  |
| ATPsynthase(F/14-kDa)subunit                          | 1 | 9  |
| CytochromeoxidasesubunitVIb                           | 3 | 1  |
| DNAreplicationandcheckpointprotein                    | 1 | 11 |
| Tyrosinephosphatasefamily                             | 1 | 1  |
| RibosomalproteinS13/S18                               | 1 | 1  |
| Trm112p-likeprotein                                   | 1 | 1  |
| COG(conservedoligomericGolgi)complexcomponent,COG2    | 1 | 1  |
| Vacuolarproteinorting-associatedprotein62             | 1 | 1  |
| RibosomalproteinL19                                   | 1 | 1  |
| TranscriptionfactorTFIIHcomplexsubunitTfb5            | 1 | 1  |
| RibosomalL22eproteinfamily                            | 1 | 3  |
| Anp1                                                  | 1 | 1  |
| Celldivisioncontrolprotein14,SINcomponent             | 1 | 1  |
| Enoyl-CoAhydratase/isomerase                          | 5 | 1  |
| RibosomalproteinS8                                    | 3 | 1  |
| MoaEprotein                                           | 1 | 1  |
| Rix1complexcomponentinvolvedin60Sribosomematuration   | 1 | 1  |
| Cellulase(glycosylhydrolasefamily5)                   | 1 | 1  |
| DNArepairproteinCrb2Tudordomain                       | 1 | 3  |

|                                                          |    |     |
|----------------------------------------------------------|----|-----|
| Sen15protein                                             | 1  | 1   |
| Yippee zinc-binding/DNA-binding/Mis18,centromereassembly | 1  | 1   |
| SCA7,zinc-bindingdomain                                  | 1  | 1   |
| RibosomalL37aeproteinfamily                              | 1  | 1   |
| VanZlikefamily                                           | 1  | 1   |
| BolA-likeprotein                                         | 1  | 1   |
| RecQmediatedgenomeinstabilityprotein                     | 1  | 1   |
| Phosphopantetheineattachmentsite                         | 1  | 1   |
| Utp11protein                                             | 1  | 1   |
| Pyridinenucleotide-disulphideoxidoreductase              | 1  | 1   |
| Eukaryoticinitiationfactor4E                             | 1  | 1   |
| Rox3mediatorcomplexsubunit                               | 1  | 3   |
| HemerythrinHHEcationbindingdomain                        | 5  | 1   |
| RibosomalproteinS6                                       | 1  | 1   |
| OHCUdecarboxylase                                        | 1  | 1   |
| HITzincfinger                                            | 1  | 1   |
| OsmC-likeprotein                                         | 1  | 1   |
| Domainofunknownfunction(DUF5102)                         | 1  | 1   |
| MitochondrialATPaseinhibitor,IATP                        | 1  | 1   |
| MitochondrialribosomalproteinmL59                        | 1  | 3   |
| Proteinphosphataseinhibitor                              | 1  | 3   |
| Glu-tRNA GlnamidotransferaseCsubunit                     | 1  | 1   |
| Domainofunknownfunction(DUF3425)                         | 7  | 3   |
| TIP41-likefamily                                         | 1  | 11  |
| PeptidaseM76family                                       | 1  | 5   |
| RegulatorofGproteinsignalingdomain                       | 1  | 1   |
| helix-turn-helix,Psqdomain                               | 11 | 106 |
| Conservedmidregionofcactin                               | 1  | 19  |
| Zincfinger,ZZtype                                        | 1  | 1   |
| Stress-inducedbacterialacidophilicrepeatmotif            | 5  | 1   |
| DDEsuperfamilyendonuclease                               | 41 | 1   |
| Poly(ADP-ribose)polymerasecatalyticdomain                | 7  | 1   |
| Extracellular tail,of10TMputativephosphatetransporter    | 3  | 1   |
| TransposaseIS4                                           | 29 | 3   |
| Ankyrinrepeats(3copies)                                  | 10 | 7   |
| Zincknuckle                                              | 7  | 3   |
| ribosomalL5PfamilyC-terminus                             | 1  | 1   |
| RNaseH                                                   | 11 | 5   |
| RibosomalproteinL35Ae                                    | 1  | 1   |
| BCS1Nterminal                                            | 1  | 1   |



|                                                    |    |    |
|----------------------------------------------------|----|----|
| Nas2N_terminaldomain                               | 1  | 3  |
| Ubiquitinfamily                                    | 3  | 1  |
| Proteinofunknownfunction(DUF3140)                  | 1  | 1  |
| N-terminaldomainofoxidoreductase                   | 1  | 1  |
| Subunit21ofMediatorcomplex                         | 1  | 1  |
| CRAL/TRIOdomain                                    | 1  | 1  |
| (2R)-phospho-3-sulfolactatesynthase(ComA)          | 1  | 1  |
| NACdomain                                          | 1  | 1  |
| Pre-PUA-likedomain                                 | 1  | 3  |
| Vesiculovirusphosphoprotein                        | 1  | 9  |
| MULEtransposasedomain                              | 5  | 3  |
| Phosphotransferaseenzyme family                    | 5  | 1  |
| Aflatoxinregulatoryprotein                         | 1  | 1  |
| Metallo-beta-lactamasesuperfamily                  | 1  | 1  |
| CoAbindingdomain                                   | 1  | 1  |
| NADbindingdomainof6-phosphogluconatedehydrogenase  | 1  | 1  |
| HelicaseconservedC-terminaldomain                  | 1  | 1  |
| MCMAAA-liddomain                                   | 1  | 1  |
| MOSCdomain                                         | 1  | 3  |
| Annexin                                            | 1  | 1  |
| Dioxygenase                                        | 11 | 1  |
| CytochromeP450                                     | 19 | 1  |
| Seedmaturationprotein                              | 1  | 1  |
| Zinc-bindingdehydrogenase                          | 3  | 1  |
| Cyclin,N-terminaldomain                            | 5  | 1  |
| Tetratricopeptiderepeat                            | 3  | 1  |
| SesBdomainonfungaldeath-pathwayprotein             | 1  | 7  |
| Clathrinadaptorcomplexsmallchain                   | 1  | 1  |
| Zinc-bindingdomain                                 | 1  | 11 |
| Cyclin-dependentkinaseregulatorysubunit            | 1  | 1  |
| Cysteine-richTMmodulestressolerance                | 1  | 1  |
| Proteinofunknownfunction(DUF3759)                  | 1  | 1  |
| MycotoxinbiosynthesisproteinUstYa                  | 1  | 9  |
| Proteinofunknownfunction(DUF3445)                  | 1  | 1  |
| Oxysterol-bindingprotein                           | 1  | 1  |
| Ubiquinol-cytochromeCreductasecomplex14kDsubunit   | 1  | 1  |
| Uncharacterizedproteinconservedinbacteria(DUF2263) | 1  | 1  |
| Carbon-nitrogenhydrolase                           | 1  | 1  |
| Haem-containingdehydratase                         | 1  | 1  |
| F-boxdomain                                        | 3  | 7  |

|                                                         |    |   |
|---------------------------------------------------------|----|---|
| SnoaL-like domain                                       | 7  | 1 |
| Fungal N-terminal domain of STAND proteins              | 1  | 5 |
| galactosyltransferase GMA12/MNN10 family                | 3  | 1 |
| Eukaryotic protein of unknown function (DUF829)         | 1  | 1 |
| KR domain                                               | 1  | 1 |
| Amino acid permease                                     | 1  | 1 |
| Domain of Unknown Function (DUF1907)                    | 1  | 1 |
| Fungal specific transcription factor domain             | 5  | 1 |
| Autophagocytosis associated protein, active-site domain | 1  | 1 |
| NmrA-like family                                        | 26 | 1 |
| ATP synthase subunit D                                  | 1  | 1 |
| HMG (high mobility group) box                           | 1  | 5 |
| Cytochrome c oxidase subunit VIa                        | 1  | 3 |
| Orsellinic acid/F9775 biosynthesis cluster protein D    | 15 | 5 |
| Translation initiation factor SUI1                      | 3  | 1 |
| Fungal protein of unknown function (DUF1752)            | 7  | 1 |
| Bacterial protein of unknown function (DUF924)          | 1  | 1 |
| Asp/Glu/Hydantoin racemase                              | 1  | 1 |
| Polyketide cyclase/dehydrase and lipid transport        | 3  | 7 |
| Caspase domain                                          | 3  | 7 |
| Fungal fruit body lectin                                | 1  | 1 |
| Antibiotic biosynthesis monooxygenase                   | 3  | 1 |
| Prion-inhibition and propagation                        | 3  | 1 |
| Thioesterase superfamily                                | 3  | 1 |
| YCII-related domain                                     | 1  | 3 |
| Frequency clock protein                                 | 1  | 1 |
| Ferritin-like domain                                    | 1  | 1 |
| Golgi phosphoprotein 3 (GPP34)                          | 1  | 1 |
| Ribose/Galactose Isomerase                              | 3  | 1 |
| ADP-ribosylglycohydrolase                               | 1  | 1 |
| NACHT domain                                            | 5  | 5 |
| AAA domain                                              | 1  | 1 |
| Ribosomal protein S14p/S29e                             | 3  | 1 |
| GATA zinc finger                                        | 5  | 3 |
| Glycosyltransferase family 64 domain                    | 1  | 1 |
| Heterokaryon incompatibility protein (HET)              | 5  | 1 |
| Enoyl-(Acyl carrier protein) reductase                  | 5  | 7 |
| Sulfotransferase domain                                 | 3  | 1 |
| Choline/ethanolamine kinase                             | 1  | 1 |
| 2EXR family                                             | 3  | 1 |

|                                                              |    |    |
|--------------------------------------------------------------|----|----|
| 2'-5'RNAligasesuperfamily                                    | 1  | 3  |
| GINScomplexprotein                                           | 1  | 3  |
| SETdomain                                                    | 3  | 1  |
| LITAF-likezincribbondomain                                   | 5  | 1  |
| Domainofunknownfunction(DUF4385)                             | 1  | 1  |
| CysteinedioxygenasetypeI                                     | 1  | 5  |
| Scytalonedehydratase                                         | 1  | 1  |
| Cytochromec                                                  | 17 | 4  |
| Fic/DOCfamily                                                | 8  | 5  |
| Carboxymuconolactonedecarboxylasefamily                      | 3  | 1  |
| RNaseH-likedomainfoundinreversetranscriptase                 | 3  | 3  |
| Glyoxalase/Bleomycinresistanceprotein/Dioxygenasesuperfamily | 7  | 5  |
| Amino-transferaseclassIV                                     | 1  | 1  |
| GMCoxidoreductase                                            | 1  | 1  |
| 3-octaprenyl-4-hydroxybenzoatecarboxy-lyase                  | 1  | 1  |
| C2H2typezinc-finger(2copies)                                 | 5  | 1  |
| SRR1                                                         | 1  | 1  |
| Chromo(CHRromatinOrganisationMOfifier)domain                 | 7  | 1  |
| gag-polypeptideofLTRcopia-type                               | 1  | 1  |
| NUDIXdomain                                                  | 5  | 5  |
| Putativeoxalocrotonatetautomeraseenzyme                      | 1  | 1  |
| Proteinofunknownfunction(DUF1479)                            | 1  | 3  |
| Phosphatidylserinedecarboxylase                              | 1  | 3  |
| Thiamine-bindingprotein                                      | 1  | 1  |
| NAD(P)-bindingRossmann-likedomain                            | 3  | 1  |
| HNHendonuclease                                              | 9  | 5  |
| T5orf172domain                                               | 5  | 3  |
| Proteinofunknownfunction(DUF3295)                            | 7  | 1  |
| Conservedhypotheticalprotein(DUF2461)                        | 1  | 1  |
| FAM32A                                                       | 1  | 5  |
| Proteinofunknownfunction(DUF659)                             | 1  | 3  |
| Asparaginase,N-terminal                                      | 1  | 1  |
| Wingedhelix-turnhelix                                        | 1  | 1  |
| Adenosinedeaminase                                           | 1  | 1  |
| Aldehydedehydrogenasefamily                                  | 1  | 13 |
| WLMdomain                                                    | 3  | 1  |
| Transposase                                                  | 33 | 1  |
| Homeodomain                                                  | 1  | 3  |
| Putativeserineesterase(DUF676)                               | 1  | 1  |
| Copperamineoxidase,N2domain                                  | 1  | 1  |

|                                                              |    |   |
|--------------------------------------------------------------|----|---|
| Patatin-likephospholipase                                    | 1  | 1 |
| O-methyltransferasedomain                                    | 1  | 1 |
| Alpha-acetolactatedecarboxylase                              | 1  | 1 |
| Reversetranscriptase(RNA-dependentDNAPolymerase)             | 15 | 1 |
| HSF-typeDNA-binding                                          | 1  | 1 |
| Helitronhelicase-likedomainatN-terminus                      | 9  | 1 |
| Pleckstrinhomologydomain                                     | 1  | 1 |
| FAR1DNA-bindingdomain                                        | 1  | 1 |
| HpcH/HpaIaldolase/citratelasefamily                          | 1  | 1 |
| Uncharacterizedalpha/betahydrolysedomain(DUF2235)            | 1  | 1 |
| non-haemdioxygenaseinmorphinesynthesisN-terminal             | 1  | 1 |
| Beta-1,3-glucanase                                           | 1  | 3 |
| Responseregulatorreceiverdomain                              | 1  | 1 |
| Endonuclease-reversetranscriptase                            | 1  | 1 |
| FMN-dependentdehydrogenase                                   | 1  | 1 |
| 14-3-3protein                                                | 1  | 1 |
| Nuclearcap-bindingproteinsubunit3                            | 1  | 3 |
| ARP2/3complex16kDasubunit(p16-Arc)                           | 1  | 1 |
| Proteinofunknownfunction(DUF3128)                            | 1  | 3 |
| RibosomalL15                                                 | 1  | 1 |
| Proteinofunknownfunction(DUF2462)                            | 1  | 1 |
| Fcf2pre-rRNAprocessing                                       | 1  | 1 |
| KinetochorecomplexFta4ofSim4subunit,orCENP-50                | 1  | 3 |
| KinetochoreSim4complexsubunitFTA2                            | 3  | 1 |
| RibosomalproteinL37e                                         | 1  | 1 |
| CytochromecoxidaseassemblyproteinPET191                      | 1  | 1 |
| Iron-sulphurclusterbiosynthesis                              | 1  | 3 |
| ChromatinassociatedproteinKTI12                              | 1  | 1 |
| CENP-SassociatingCentromereproteinX                          | 1  | 1 |
| Macrophagemigrationinhibitoryfactor(MIF)                     | 1  | 1 |
| RF-1domain                                                   | 1  | 1 |
| Frataxin-likedomain                                          | 1  | 1 |
| KAPfamilyP-loopdomain                                        | 1  | 1 |
| Rpp14/Pop5family                                             | 1  | 1 |
| SnoaL-likepolyketidecyclase                                  | 3  | 1 |
| HistonechaperonedomainCHZ                                    | 1  | 1 |
| MitochondrialK <sup>+</sup> -H <sup>+</sup> exchange-related | 1  | 1 |
| Phosphatidylinositol-4-phosphate5-Kinase                     | 1  | 1 |
| MitochondrialimportproteinPam17                              | 1  | 5 |
| Zincfinger,C3HC4type(RINGfinger)                             | 1  | 1 |

|                                              |   |   |
|----------------------------------------------|---|---|
| DehydroquinaseclassII                        | 1 | 1 |
| MitochondrialF1-F0ATPsynthasesubunitFoffungi | 1 | 1 |
| RibosomalproteinS19e                         | 1 | 1 |
| BAGdomain                                    | 1 | 1 |
| Ubiquinol-cytochromeCreductasehingeprotein   | 1 | 1 |
| Proteinofunknownfunction(DUF2457)            | 1 | 1 |
| Putativeesterase                             | 1 | 1 |
| Apc13pprotein                                | 1 | 3 |
| Uncharacterisedprotein(DUF2406)              | 1 | 1 |
| RibosomalproteinL36e                         | 1 | 1 |
| Dualspecificityphosphatase,catalyticdomain   | 1 | 1 |
| Sybindin-likefamily                          | 1 | 1 |
| Clr5domain                                   | 3 | 1 |
| Proteinofunknownfunction(DUF1674)            | 1 | 1 |
| D-Tyr-tRNA(Tyr)deacylase                     | 1 | 1 |
| RHOproteinGDPdissociationinhibitor           | 1 | 1 |
| Bacterialtransferasehexapeptide(sixrepeats)  | 1 | 1 |
| Haloaciddehalogenase-likehydrolase           | 3 | 1 |
| RanBP1domain                                 | 1 | 1 |
| MIOREXcomplexcomponent7                      | 1 | 1 |
| RibosomalproteinS26e                         | 1 | 1 |
| TubulinbindingcofactorA                      | 1 | 1 |
| EisosomecomponentPIL1                        | 1 | 1 |
| Pam16                                        | 1 | 1 |
| Cenp-Okinetochorecentromerecomponent         | 1 | 1 |
| EMG1/NEP1methyltransferase                   | 1 | 1 |
| AAA-ATPaseVps4-associatedprotein1            | 1 | 1 |
| ArgininosuccinatelyaseC-terminal             | 1 | 1 |
| NB-ARCdomain                                 | 1 | 1 |
| Acylphosphatase                              | 1 | 1 |
| Transcriptionalregulator                     | 1 | 1 |
| AutophagyreceptorATG43                       | 1 | 1 |
| ChaC-likeprotein                             | 1 | 1 |
| Proteinofunknownfunction(DUF1223)            | 1 | 1 |
| ATPsynthaseEchain                            | 1 | 1 |
| MitochondrialribosomalproteinL27             | 1 | 1 |
| Mitochondrialpyruvatecarriers                | 1 | 1 |
| Proteinofunknownfunction(DUF1687)            | 1 | 1 |
| RibosomalproteinL14                          | 5 | 1 |
| ATPsynthaseDchain,mitochondrial(ATP5H)       | 1 | 1 |

|                                                                   |   |   |
|-------------------------------------------------------------------|---|---|
| SOH1                                                              | 1 | 1 |
| Thaumatinfamily                                                   | 1 | 3 |
| NADdependentepimerase/dehydratasefamily                           | 1 | 1 |
| Phosphoglucomutase/phosphomannomutase,alpha/beta/<br>alphadomainI | 1 | 1 |
| Maltoseacetyltransferase                                          | 1 | 1 |
| ADP-ribosylationfactorfamily                                      | 1 | 1 |
| Transcriptionalactivatorofglycolyticenzymes                       | 1 | 1 |
| N-terminaldomainonNACHT_NTPaseandP-loopNTPases                    | 1 | 1 |
| DADfamily                                                         | 1 | 1 |
| Alteredinheritanceofmitochondria5                                 | 1 | 1 |
| CoproporphyrinogenIIIoxidase                                      | 1 | 1 |
| LYAR-typeC2HCzincfinger                                           | 1 | 1 |
| Domainofunknownfunction(DUF202)                                   | 1 | 1 |
| LETM1-likeprotein                                                 | 1 | 1 |
| AlcoholdehydrogenaseGroES-likedomain                              | 1 | 1 |
| 3-hydroxyanthranilicaciddioxygenase                               | 1 | 1 |
| Dpy-30motif                                                       | 1 | 1 |
| Alb1                                                              | 1 | 1 |
| NADHubiquinoneoxidoreductasesubunitNDUFA12                        | 1 | 1 |
| Fructose-bisphosphatealdolaseclass-II                             | 1 | 1 |
| Isy1-likesplicingfamily                                           | 1 | 1 |
| KinetochoreproteinMis14like                                       | 1 | 1 |
| Ringfingerdomain                                                  | 3 | 0 |
| Bacteriocin-protection,YdeIorOmpD-Associated                      | 1 | 0 |
| RibosomalproteinS21                                               | 3 | 0 |
| CHYzincfinger                                                     | 1 | 0 |
| Proteinofunknownfunction(DUF3723)                                 | 1 | 0 |
| UbiquinonebiosynthesisproteinCOQ7                                 | 1 | 0 |
| Pirin                                                             | 1 | 0 |
| Catalase                                                          | 1 | 0 |
| Bucentaurorcraniofacialdevelopment                                | 1 | 0 |
| BUD22                                                             | 1 | 0 |
| ThreonylandAlanyl-tRNAsynthetasessecondadditionaldomain           | 1 | 0 |
| 50Sribosome-bindingGTPase                                         | 1 | 0 |
| 39SmitochondrialribosomalproteinL46                               | 1 | 0 |
| 4Fe-4Sdiclusterdomain                                             | 1 | 0 |
| MybDNA-bindinglike                                                | 1 | 0 |
| Mtf2family                                                        | 1 | 0 |
| Amidase                                                           | 1 | 0 |
| TatDrelatedDNase                                                  | 1 | 0 |

|                           |   |   |
|---------------------------|---|---|
| GCN5-likeprotein1(GCN5L1) | 1 | 0 |
| Ctf8                      | 1 | 0 |
| DASHcomplexsubunitDad3    | 1 | 0 |
| CorehistoneH2A/H2B/H3/H4  | 1 | 0 |
| EutQ-likecupindomain      | 1 | 0 |
| WGRdomain                 | 3 | 0 |

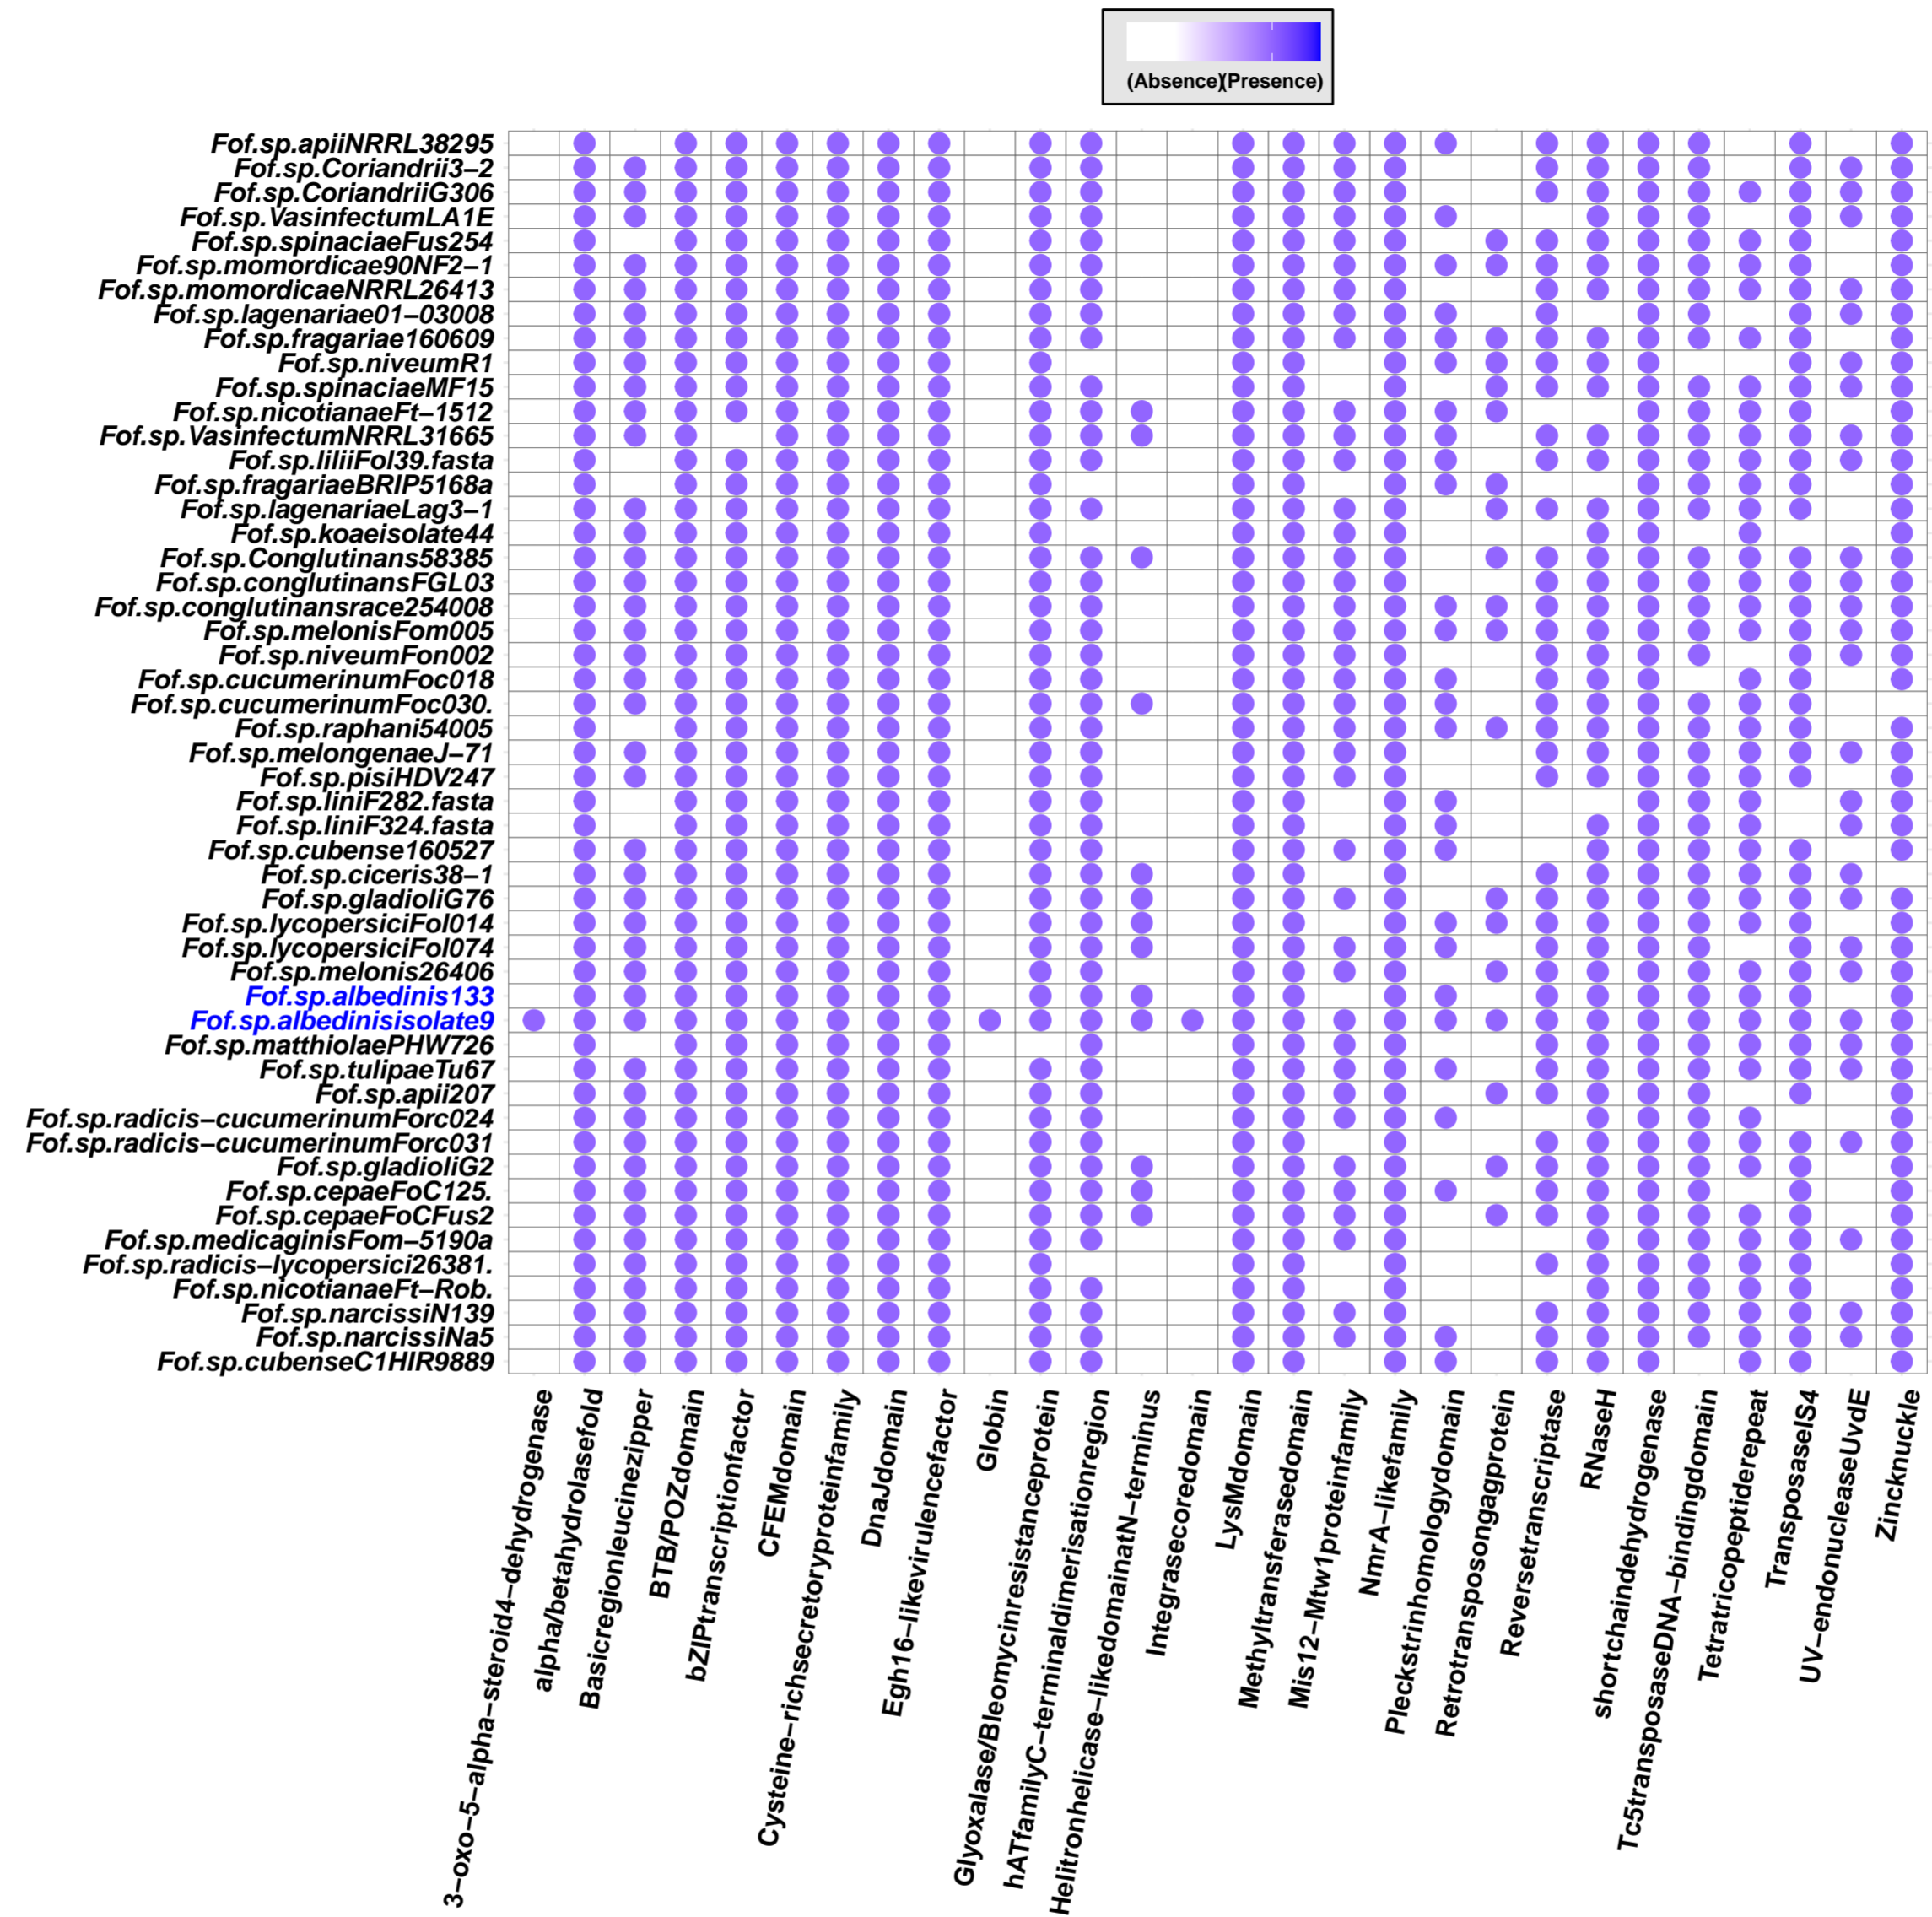

**Figure 1 : Presence/absence map of Foa unique effector distribution in the effector repertoire of Foa and other analyzed formae speciales.** The bubbles indicate the presence of Foa unique effectors and the empty boxes represent their absence in each strain. Abbreviations: (Fusarium); o (oxysporum); f (forma); sp (specialis). The names following the abbreviations represent the names of the formae speciales; the abbreviations coming after the names of the formae speciales correspond to the strains belonging to these formae speciales (F.o.f.sp. albedinis 133: Fusarium oxysporum forma specialis albedinis Foa 133).
