# Supplementary material for: In silico comparative genomic analysis unravels a new candidate protein arsenal specifically associated with Fusarium oxysporum f. sp. albedinis pathogenesis
Source: PubMed Central journal article supplement (PMC9646873; doi:10.1038/s41598-022-21858-1), 2022-11-09
Supplement: 41598_2022_21858_MOESM4_ESM.pdf [file 41598_2022_21858_MOESM4_ESM.pdf]

**Supplementary data 4 : Table 1 : predicted secreted CAZYme families /sub-families of *Fusarium oxysporum*.f. sp. *albedinis* strains**

| <i>Fusarium oxysporum</i> . f. sp. <i>albedinis</i> 133 |                              |              | <i>Fusarium oxysporum</i> . f. sp. <i>albedinis</i> 9 |                              |              |
|---------------------------------------------------------|------------------------------|--------------|-------------------------------------------------------|------------------------------|--------------|
| CAZYme classes                                          | CAZYme families/sub-families | CAZYme count | CAZYme classes                                        | CAZYme families/sub-families | CAZYme count |
| AA                                                      | AA1_3                        | 5            | AA                                                    | AA1_3                        | 4            |
| AA                                                      | AA2                          | 3            | AA                                                    | AA3_2                        | 3            |
| AA                                                      | AA3_2                        | 3            | AA                                                    | AA3_3                        | 1            |
| AA                                                      | AA3_3                        | 1            | AA                                                    | AA5_2                        | 5            |
| AA                                                      | AA5_2                        | 5            | AA                                                    | AA6                          | 1            |
| CBM                                                     | CBM1                         | 7            | AA                                                    | AA9                          | 1            |
| CBM                                                     | CBM18                        | 2            | CBM                                                   | CBM1                         | 8            |
| CBM                                                     | CBM20                        | 1            | CBM                                                   | CBM18                        | 2            |
| CBM                                                     | CBM32                        | 4            | CBM                                                   | CBM32                        | 4            |
| CBM                                                     | CBM38                        | 1            | CBM                                                   | CBM38                        | 1            |
| CBM                                                     | CBM42                        | 1            | CBM                                                   | CBM42                        | 1            |
| CE                                                      | CE1                          | 2            | CE                                                    | CE1                          | 2            |
| CE                                                      | CE4                          | 1            | CE                                                    | CE4                          | 2            |
| CE                                                      | CE5                          | 4            | CE                                                    | CE5                          | 4            |
| CE                                                      | CE8                          | 1            | CE                                                    | CE8                          | 1            |
| CE                                                      | CE12                         | 1            | CE                                                    | CE12                         | 1            |
| CE                                                      | CE16                         | 1            | CE                                                    | CE16                         | 1            |
| GH                                                      | GH3                          | 16           | GH                                                    | GH2                          | 4            |
| GH                                                      | GH5_5                        | 2            | GH                                                    | GH3                          | 18           |
| GH                                                      | GH5_7                        | 1            | GH                                                    | GH5_5                        | 1            |
| GH                                                      | GH5_9                        | 1            | GH                                                    | GH5_7                        | 1            |

|    |        |   |    |         |   |
|----|--------|---|----|---------|---|
| GH | GH5_15 | 1 | GH | GH5_15  | 2 |
| GH | GH6    | 1 | GH | GH6     | 1 |
| GH | GH7    | 2 | GH | GH7     | 2 |
| GH | GH10   | 3 | GH | GH10    | 3 |
| GH | GH11   | 3 | GH | GH11    | 3 |
| GH | GH12   | 2 | GH | GH12    | 2 |
| GH | GH13_1 | 1 | GH | GH13_1  | 1 |
| GH | GH15   | 1 | GH | GH13_25 | 1 |
| GH | GH17   | 3 | GH | GH13_40 | 1 |
| GH | GH18   | 3 | GH | GH16_1  | 1 |
| GH | GH27   | 1 | GH | GH17    | 3 |
| GH | GH28   | 8 | GH | GH18    | 4 |
| GH | GH31   | 2 | GH | GH27    | 1 |
| GH | GH32   | 1 | GH | GH28    | 8 |
| GH | GH35   | 3 | GH | GH31    | 2 |
| GH | GH36   | 1 | GH | GH32    | 1 |
| GH | GH37   | 1 | GH | GH35    | 3 |
| GH | GH43_5 | 2 | GH | GH36    | 1 |
| GH | GH47   | 2 | GH | GH37    | 1 |
| GH | GH49   | 1 | GH | GH38    | 1 |
| GH | GH53   | 1 | GH | GH43_1  | 1 |
| GH | GH54   | 1 | GH | GH43_5  | 2 |
| GH | GH55   | 1 | GH | GH43_11 | 1 |
| GH | GH62   | 1 | GH | GH47    | 5 |
| GH | GH63   | 1 | GH | GH49    | 1 |
| GH | GH65   | 1 | GH | GH51    | 1 |
| GH | GH67   | 2 | GH | GH53    | 1 |

|    |      |   |    |      |   |
|----|------|---|----|------|---|
| GH | GH75 | 2 | GH | GH54 | 1 |
|----|------|---|----|------|---|

|    |       |   |    |       |   |
|----|-------|---|----|-------|---|
| GH | GH76  | 2 | GH | GH55  | 1 |
| GT | GT2   | 4 | GH | GH62  | 1 |
| GT | GT4   | 2 | GH | GH63  | 1 |
| GT | GT31  | 3 | GH | GH65  | 1 |
| GT | GT32  | 1 | GH | GH67  | 2 |
| GT | GT33  | 1 | GH | GH75  | 2 |
| GT | GT39  | 3 | GH | GH76  | 2 |
| GT | GT57  | 1 | GH | GH133 | 1 |
| GT | GT58  | 1 | GT | GT1   | 3 |
| GT | GT59  | 1 | GT | GT2   | 3 |
| PL | PL1_2 | 1 | GT | GT4   | 3 |
| PL | PL1_4 | 5 | GT | GT32  | 1 |
| PL | PL1_7 | 3 | GT | GT33  | 1 |
| PL | PL3_2 | 6 | GT | GT39  | 2 |
| PL | PL4_1 | 1 | GT | GT48  | 1 |
| PL | PL4_3 | 2 | GT | GT57  | 1 |
|    |       |   | GT | GT66  | 1 |
|    |       |   | PL | PL1_2 | 1 |
|    |       |   | PL | PL1_4 | 5 |
|    |       |   | PL | PL1_7 | 3 |
|    |       |   | PL | PL3_2 | 6 |
|    |       |   | PL | PL4_1 | 1 |
|    |       |   | PL | PL4_3 | 2 |
